# Supplementary material for: Cell type-specific NRBF2 orchestrates autophagic flux and adult hippocampal neurogenesis in chronic stress-induced depression
Source: PubMed Central journal article supplement (PMC10465581; doi:10.1038/s41421-023-00583-7), 2023-08-29
Supplement: 41421_2023_583_MOESM1_ESM.pdf [file 41421_2023_583_MOESM1_ESM.pdf]

1 **Cell type-specific NRBF2 orchestrates autophagic flux and adult**  
2 **hippocampal neurogenesis in chronic stress-induced depression**

3 Shao-Qi Zhang<sup>1,7</sup>, Qiao Deng<sup>1,7</sup>, Qi Zhu<sup>2,7</sup>, Zhuang-Li Hu<sup>1,3,4,5</sup>, Li-Hong Long<sup>1,3,4,5</sup>,  
4 Peng-Fei Wu<sup>1,4,5</sup>, Jin-Gang He<sup>1,4,5</sup>, Hong-Sheng Chen<sup>1,3</sup>, Zhenyu Yue<sup>6</sup>, Jia-Hong Lu<sup>2,✉</sup>,  
5 Fang Wang<sup>1,3,4,5, ✉</sup>, & Jian-Guo Chen<sup>1,3,4,5, ✉</sup>

6  
7 <sup>1</sup>Department of Pharmacology, School of Basic Medicine, Tongji Medical College,  
8 Huazhong University of Science and Technology, Wuhan, Hubei, China

9 <sup>2</sup>State Key Laboratory of Quality Research in Chinese Medicine, Institute of Chinese  
10 Medical Sciences, University of Macau, Macau SAR, China

11 <sup>3</sup>The Key Laboratory of Neurological Diseases (HUST), Ministry of Education of  
12 China, Wuhan, Hubei, China

13 <sup>4</sup>Laboratory of Neuropsychiatric Diseases, The Institute of Brain Research, Huazhong  
14 University of Science and Technology, Wuhan, Hubei, China

15 <sup>5</sup>The Key Laboratory for Drug Target Researches and Pharmacodynamic Evaluation of  
16 Hubei Province, Wuhan, Hubei, China

17 <sup>6</sup>Department of Neuroscience, Friedman Brain Institute, Icahn School of Medicine at  
18 Mount Sinai, New York, NY, USA

19 <sup>7</sup>These authors contributed equally: Shao-Qi Zhang, Qiao Deng, Qi Zhu.

20  
21 ✉e-mail: chenj@mails.tjmu.edu.cn; wangfanghust@hust.edu.cn;  
22 jiahonglu@um.edu.mo

23  
24 Running title: aNSCs-specific NRBF2 regulates depression-like behavior

28

29 **Supplementary figures**

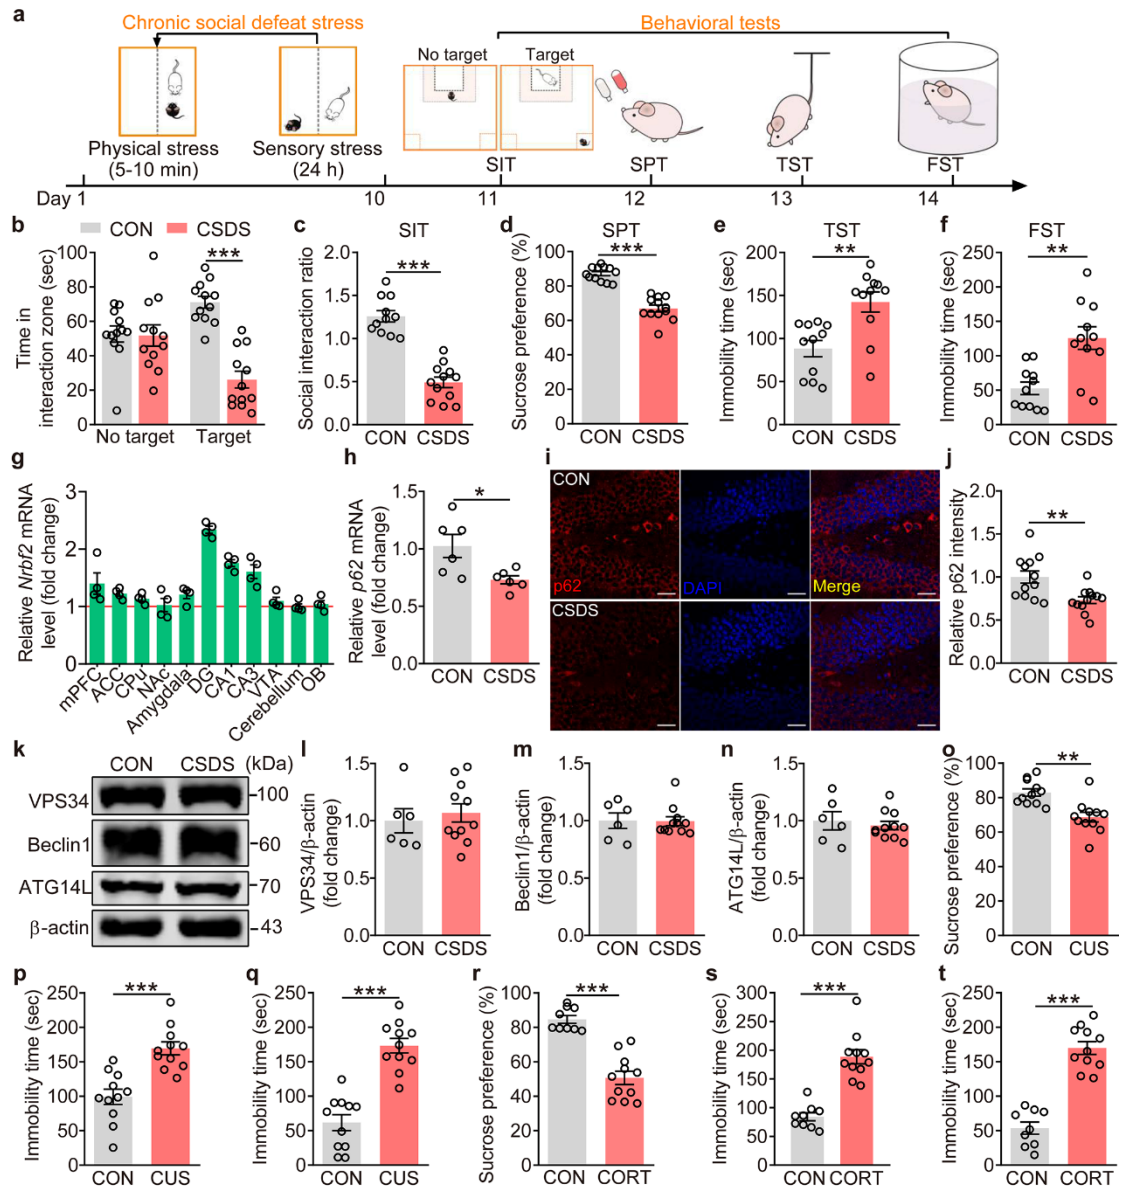

30

31 **Supplementary Fig. S1. Chronic stress induces depression-like behavior in mice.**

32 **a** Experimental paradigms for CSDS and behavioral tests.

33 **b-f** Depression-like behavior in CSDS-exposed mice, as measured by the social interaction time (**b**)  
 34 and social interaction ratio (**c**) in SIT, the sucrose preference in SPT (**d**), and the immobility time in  
 35 TST (**e**) and FST (**f**) ( $n = 11-12$  mice per group).

36 **g** *Nrbf2* mRNA level in different brain areas of adult naive mice ( $n = 4$  mice per group). mPFC,  
 37 medial prefrontal cortex; ACC, anterior cingulate cortex; CPu, caudate putamen; NAc, nucleus  
 38 accumbens; DG, dentate gyrus, CA1, cornu ammonis 1; CA3, cornu ammonis 3; VTA, ventral  
 39 tegmental area; OB, olfactory bulb.

40 **h** Quantitative real-time PCR result showing the *p62* mRNA level in the DG ( $n = 6$  mice per group).

41 **i, j** Representative images (**i**) and quantification (**j**) of p62 intensity in the DG ( $n = 12$  slices per

42 group). Scale bars, 30  $\mu\text{m}$ .  
43 **k-n** Representative images (**k**) and quantification of the protein expressions of VPS34 (**l**), Beclin1  
44 (**m**), and ATG14L (**n**) in the DG ( $n = 6-11$  mice per group).  
45 **o-q** Behavioral tests of SPT (**o**), TST (**p**), and FST (**q**) in control and CUS-treated mice ( $n = 11$  mice  
46 per group).  
47 **r-t** Behavioral tests of SPT (**r**), TST (**s**) and FST (**t**) in control and CORT-treated mice ( $n = 9-11$   
48 mice per group).  
49 Data are presented as mean  $\pm$  SEM and analyzed by two-sided unpaired t test (**c-f**, **h**, **j**, **l-t**) or two-  
50 way ANOVA following by Bonferroni's post hoc test (**b**). \* $P < 0.05$ , \*\* $P < 0.01$ , and \*\*\* $P < 0.001$ .

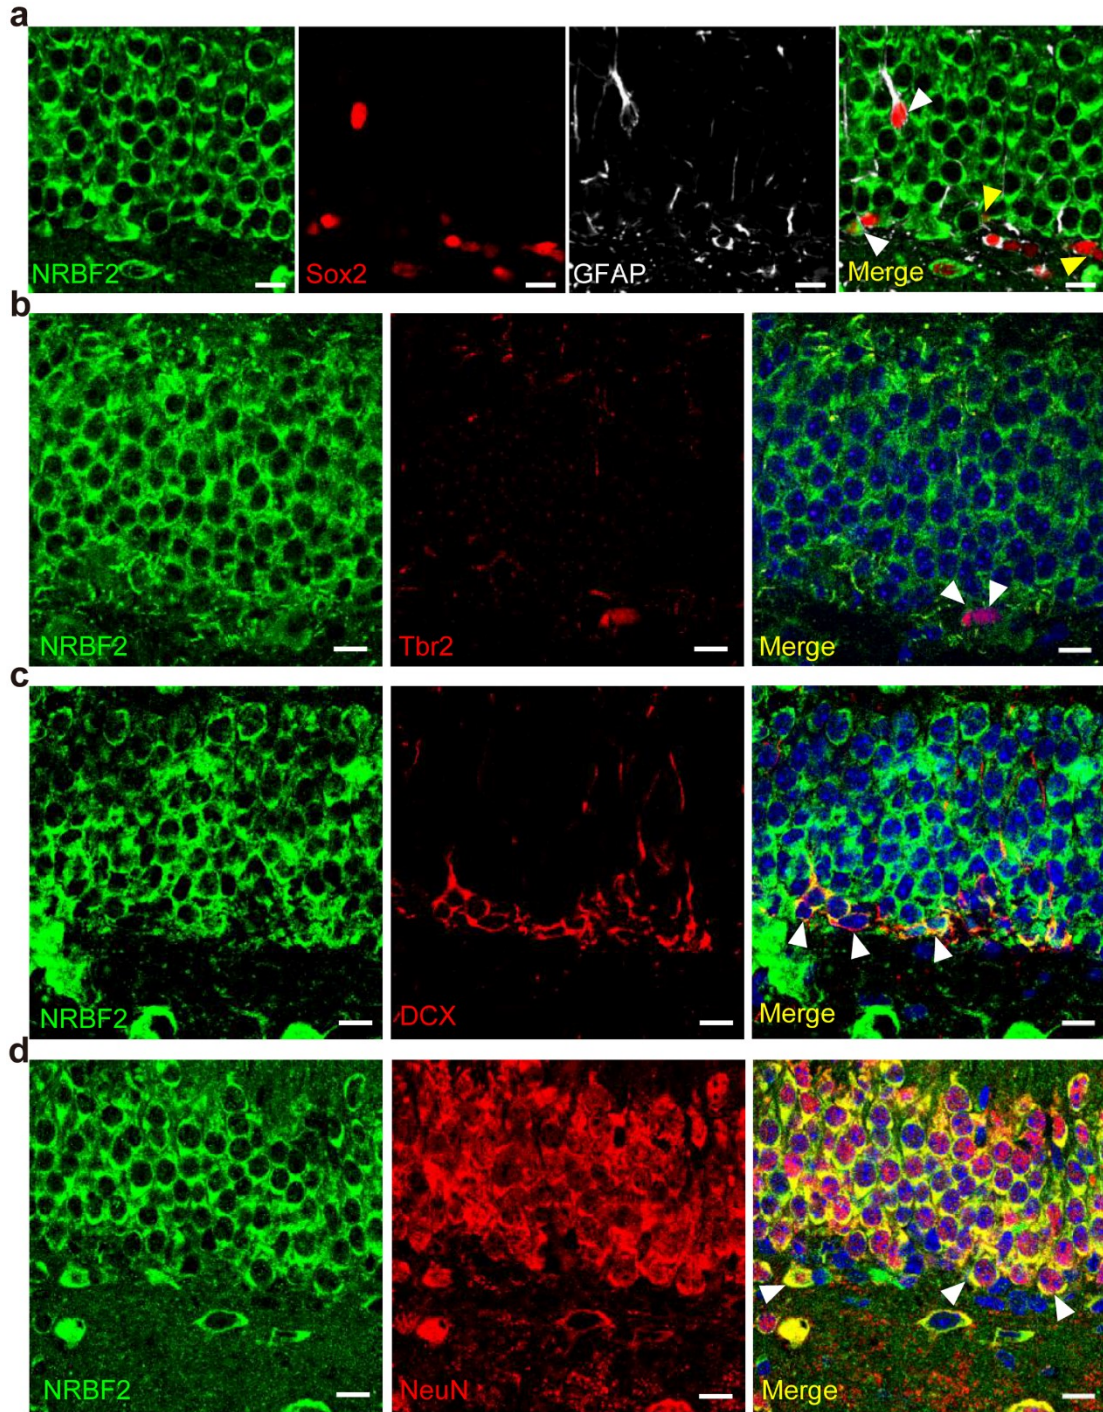

51

52 **Supplementary Fig. S2 The NRBF2 expression in dentate gyrus of adult mice.**

53 **a** Immunofluorescent analysis of NRBF2 expression in Sox2<sup>+</sup>GFAP<sup>+</sup> type 1 NSCs and Sox2<sup>+</sup>GFAP<sup>-</sup>  
 54 type 2 NSCs. White arrows indicating NRBF2<sup>+</sup>Sox2<sup>+</sup>GFAP<sup>+</sup> type 1 NSCs and yellow arrows  
 55 indicating NRBF2<sup>+</sup>Sox2<sup>+</sup>GFAP<sup>-</sup> type 2 NSCs. Scale bars, 10 μm.

56 **b** Immunofluorescent analysis of NRBF2 expression in Tbr2<sup>+</sup> IPCs. White arrow indicating  
 57 NRBF2<sup>+</sup>Tbr2<sup>+</sup> IPCs. Scale bars, 10 μm.

58 **c, d** Immunofluorescent analysis of NRBF2 expression in DCX<sup>+</sup> neuroblasts (**c**) and NeuN<sup>+</sup> neurons  
 59 (**d**) in the DG. White arrows indicating NRBF2<sup>+</sup>DCX<sup>+</sup> neuroblasts or NRBF2<sup>+</sup>NeuN<sup>+</sup> neurons. Scale

60 bars, 10  $\mu\text{m}$ .

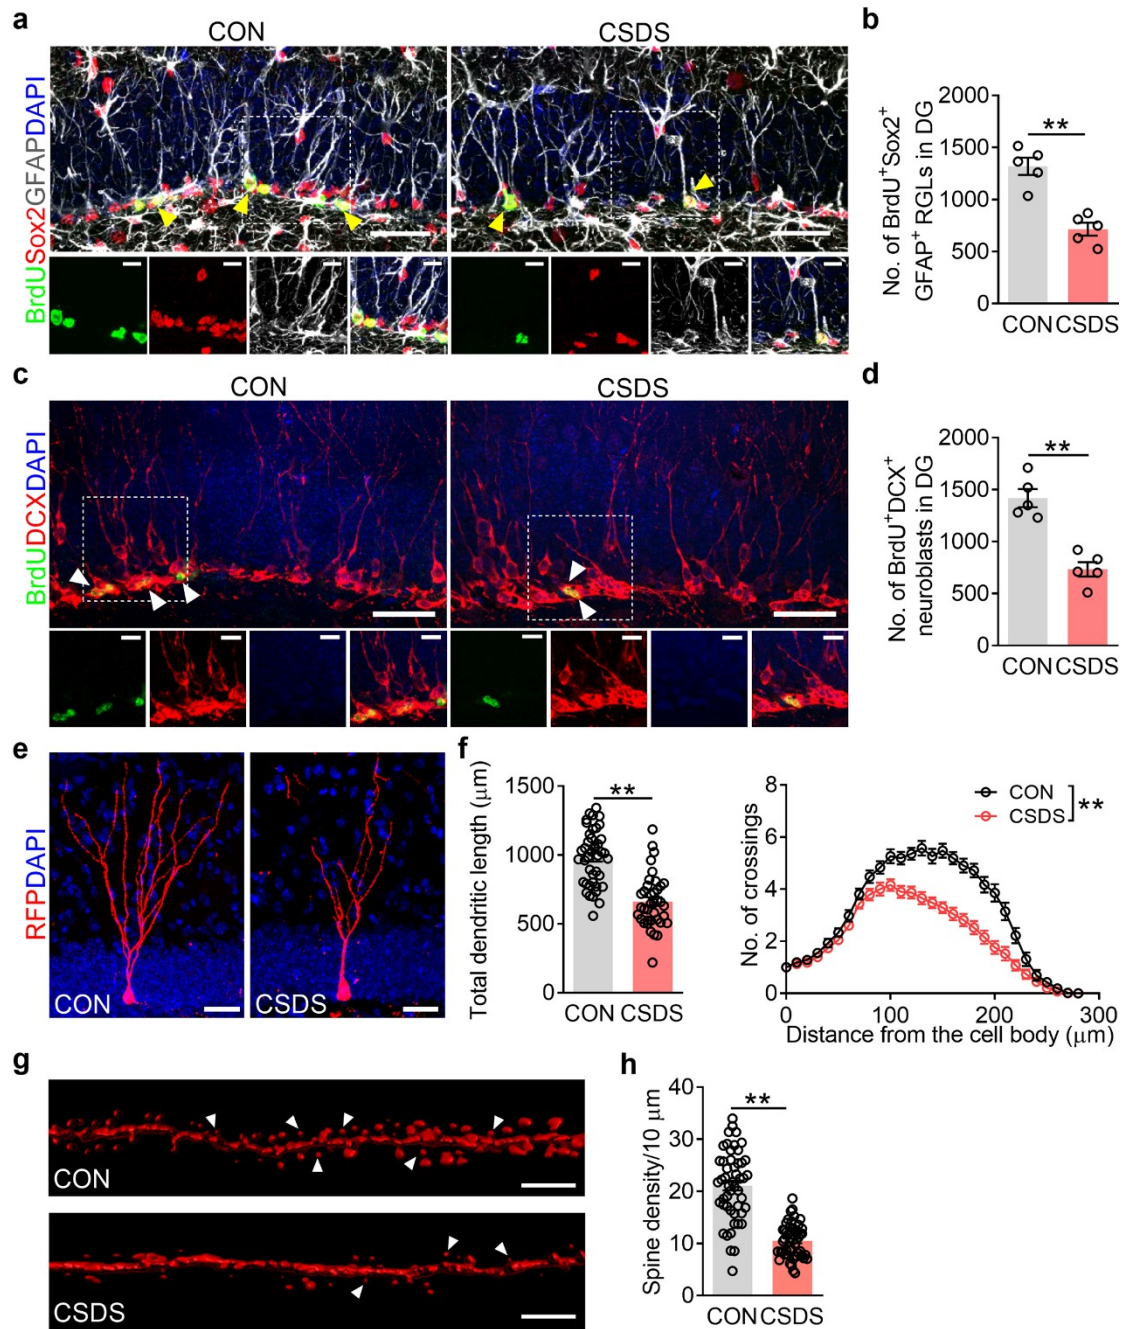

61

62

63

**Supplementary Fig. S3 CSDS impairs AHN and the development of newborn neuron in the DG of mice.**

64

65

66

67

68

69

70

71

72

**a** Representative confocal image of BrdU<sup>+</sup>Sox2<sup>+</sup>GFAP<sup>+</sup> RGLs in the DG of control and CSDS-exposed mice. Bottom panels: higher magnification views of selected regions (white square), BrdU (green), Sox2 (red), GFAP (white), and DAPI (blue). Yellow arrows indicating BrdU<sup>+</sup>Sox2<sup>+</sup>GFAP<sup>+</sup> RGLs. Scale bars, 30 μm (overview) and 10 μm (zoom).

**b** Quantifications showing the number of BrdU<sup>+</sup>Sox2<sup>+</sup>GFAP<sup>+</sup> RGLs in the DG ( $n = 5$  mice per group).

**c, d** Representative images (**c**) and quantifications (**d**) showing the number of BrdU<sup>+</sup>DCX<sup>+</sup> neuroblasts in the DG ( $n = 5$  mice per group). BrdU (green), DCX (red), and DAPI (blue). White arrows indicating BrdU<sup>+</sup>DCX<sup>+</sup> neuroblasts. Scale bars, 30 μm (overview) and 10 μm (zoom).

73 **e, f** Representative confocal images (**e**) and quantifications of the dendritic length (**f**, left) and  
74 dendritic complexity (**f**, right) in RFP<sup>+</sup> newborn neurons ( $n = 38-42$  cells per group). Scale bars, 30  
75  $\mu\text{m}$ .  
76 **g, h** Representative images (**g**) and quantifications (**h**) of dendritic spines density of RFP<sup>+</sup> newborn  
77 neurons ( $n = 50$  segments per group). White arrows indicating spines. Scale bars, 5  $\mu\text{m}$ .  
78 Data are presented as mean  $\pm$  SEM and analyzed by two-sided unpaired t test (**b, d, f, h**) or repeated  
79 measures ANOVA (**f**, right). \*\* $P < 0.01$  and \*\*\* $P < 0.001$ .

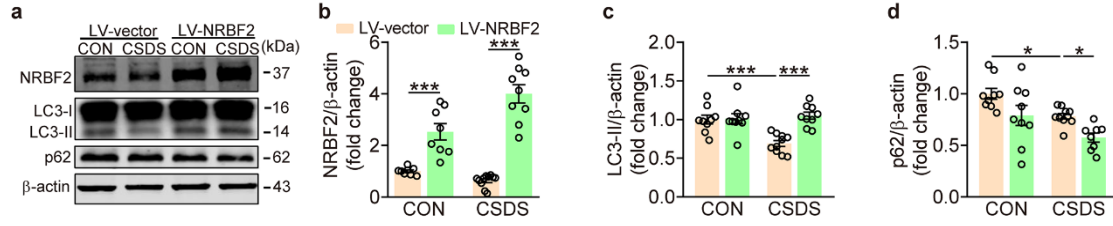

80

81 **Supplementary Fig. S4 Overexpression of NRBF2 ameliorates CSDS-induced autophagic**  
 82 **deficiency in the DG.**

83 **a-d** Representative images (**a**) and quantifications of NRBF2 (**b**), LC3-II (**c**) and p62 (**d**) protein  
 84 expression in the DG upon control and CSDS-exposed mice treated with LV-vector or LV-NRBF2  
 85 ( $n = 8-11$  mice per group).

86 Data are presented as mean  $\pm$  SEM and analyzed by two-way ANOVA following by Bonferroni's  
 87 post hoc test (**b-d**).  $*P < 0.05$  and  $***P < 0.001$ .



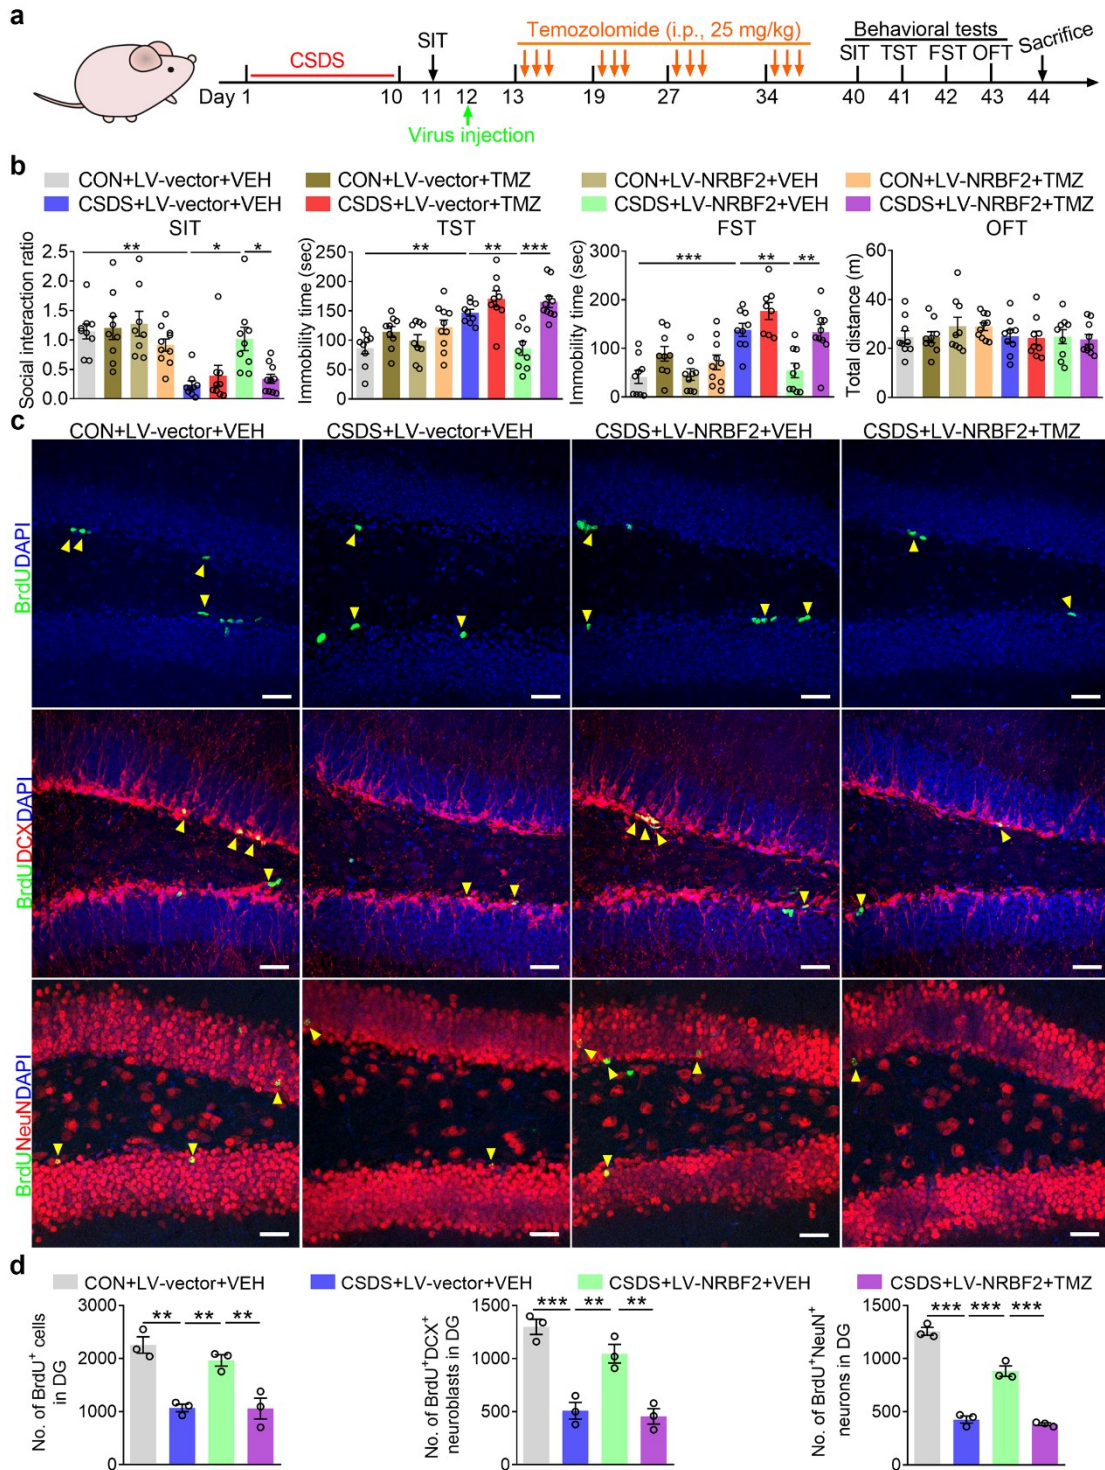

88

89 **Supplementary Fig. S5 Chronic temozolomide treatment abolishes the antidepressant and**  
 90 **proneurogenic effects of NRBF2 overexpression.**

91 **a** Timeline of experiments.

92 **b** Behavioral tests of SIT, TST, FST, and OFT in control and CSDS-exposed mice expressing LV-  
 93 vector or LV-NRBF2, and following by treatment with temozolomide (TMZ) for 4 weeks ( $n = 8$ -  
 94 10 mice per group).

95 **c** Representative images of BrdU<sup>+</sup> cells, BrdU<sup>+</sup>DCX<sup>+</sup> neuroblasts, and BrdU<sup>+</sup>NeuN<sup>+</sup> neurons in the

96 DG of CON + LV-vector + VEH, CSDS + LV-vector + VEH, CSDS + LV-NRBF2 + VEH, and  
97 CSDS + LV-NRBF2 + TMZ group. Yellow arrows indicating BrdU<sup>+</sup> and marker<sup>+</sup> cells. Scale bars,  
98 30  $\mu$ m.  
99 **d** Quantification of BrdU<sup>+</sup> cells, BrdU<sup>+</sup>DCX<sup>+</sup> neuroblasts, and BrdU<sup>+</sup>NeuN<sup>+</sup> neurons in the DG (*n*  
100 = 3 mice per group).  
101 Data are presented as mean  $\pm$  SEM and analyzed by one-way ANOVA following by Tukey's post  
102 hoc test (**b, d**). \**P* < 0.05, \*\**P* < 0.01, and \*\*\**P* < 0.001.

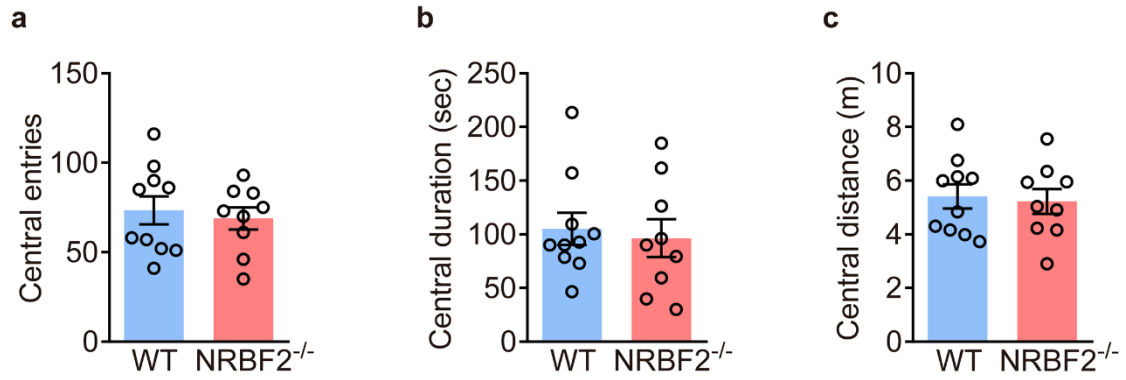

103

104 **Supplementary Fig. S6 NRBF2 deletion does not lead to anxiety-like behavior of mice.**

105 **a-c** Behavioral tests of OFT, such as central entries, central duration and central distance, in WT  
 106 and NRBF2<sup>-/-</sup> mice (*n* = 9-10 mice per group).

107 Data are presented as mean ± SEM and analyzed by two-sided unpaired t test (**a-c**).

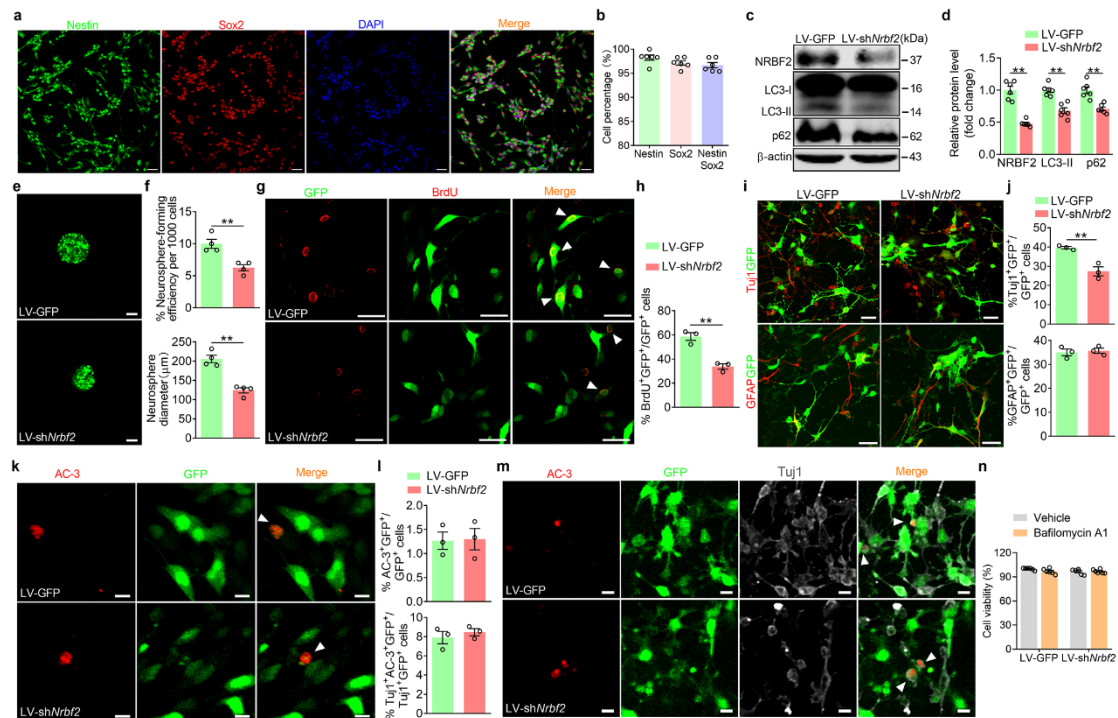

108

109

**Supplementary Fig. S7 Deficiency of NRBF2 impairs proliferation and neural differentiation, but not apoptosis in adult neural stem cells.**

110

**a, b** Representative images (**a**) and quantifications (**b**) of Nestin<sup>+</sup>Sox2<sup>+</sup> aNSCs, Nestin (green), Sox2 (red), DAPI (blue). Scale bars, 50  $\mu$ m. The majority of aNSCs (96.69%) expressed both neural stem cell markers Nestin and Sox2 ( $n = 6$  independent experiments per group).

112

113

**c, d** Representative images (**c**) and quantifications (**d**) of NRBF2, LC3-II and p62 protein expression in aNSCs treated with LV-sh*Nrbf2* or LV-GFP ( $n = 6$  independent experiments per group).

115

116

**e** Representative images of neurospheres. Scale bars, 50  $\mu$ m.

117

118

**f** Quantification of the neurosphere-forming efficiency and the diameter of neurospheres ( $n = 4$  independent experiments per group).

119

120

**g, h** Representative images (**g**) and quantifications (**h**) of proliferating aNSCs, followed by BrdU pulse labeling and immunofluorescent analysis ( $n = 3$  independent experiments per group). White arrows indicating BrdU<sup>+</sup>GFP<sup>+</sup> cells. Scale bars, 30  $\mu$ m.

121

122

**i** Representative images of differentiated aNSCs, followed by immunostaining with the neuronal marker, Tuj1, and the astrocytic marker, GFAP. Scale bars, 30  $\mu$ m.

123

124

**j** Quantification of the percentage of differentiated Tuj1<sup>+</sup>GFP<sup>+</sup> neurons and GFAP<sup>+</sup>GFP<sup>+</sup> astrocytes ( $n = 3$  independent experiments per group).

125

126

**k** Representative images of proliferating aNSCs, followed by immunostaining with activated caspase-3 (AC-3). White arrows indicating AC-3<sup>+</sup>GFP<sup>+</sup> cells. Scale bars, 10  $\mu$ m.

127

128

**l** Quantification of the percentage of AC-3<sup>+</sup>GFP<sup>+</sup> proliferating aNSCs or Tuj1<sup>+</sup>AC-3<sup>+</sup>GFP<sup>+</sup> differentiated aNSCs ( $n = 3$  independent experiments per group).

129

130

**m** Representative images of differentiated aNSCs, followed by immunostaining with Tuj1 and AC-3. White arrows indicating Tuj1<sup>+</sup>AC-3<sup>+</sup>GFP<sup>+</sup> cells. Scale bars, 10  $\mu$ m.

131

132

**n** Quantification of the cell viability in control and NRBF2-deficient aNSCs treated with vehicle (0.1% DMSO) or bafilomycin A1 ( $n = 6$  independent experiments per group).

133

134 Data are presented as mean  $\pm$  SEM and analyzed by two-sided unpaired t test (**d, f, h, j, l**) or two-  
135 way ANOVA following by Bonferroni's post hoc test (**n**). \*\* $P < 0.01$ .

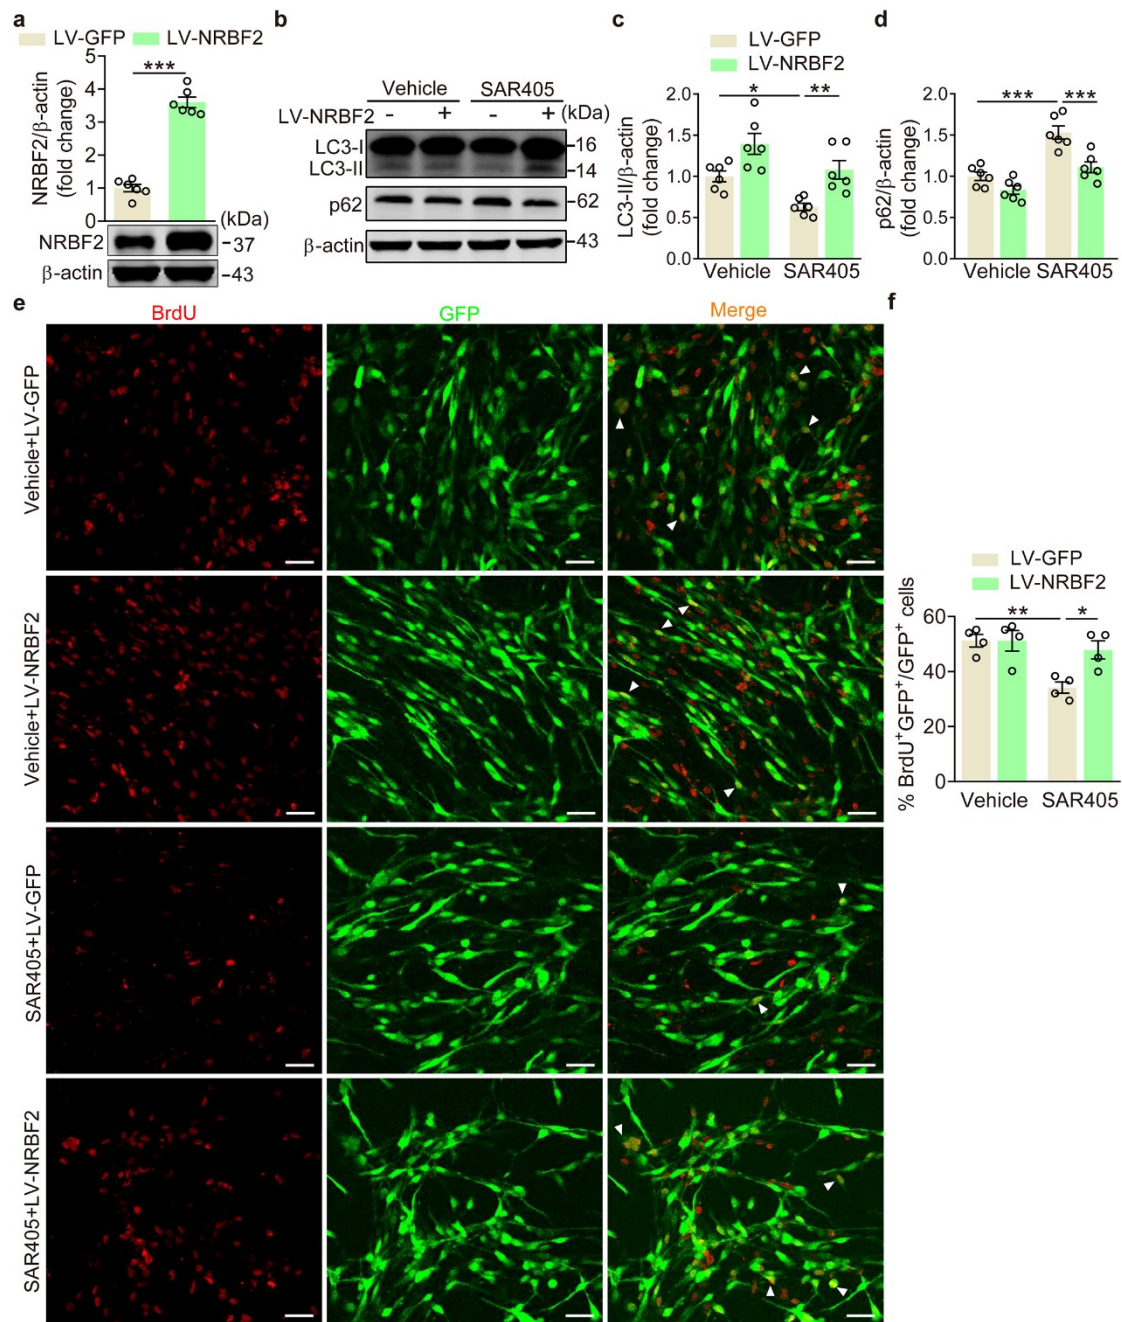

136

137 **Supplementary Fig. S8 NRBF2 overexpression ameliorates SAR405-induced inhibition of**  
 138 **autophagy and proliferated deficiency of aNSCs *in vitro*.**

139 **a** Representative western blotting images and quantification of NRBF2 protein expression in aNSCs  
 140 transfected with LV-GFP or LV-NRBF2 ( $n = 6$  independent experiments per group).

141 **b-d** Representative western blotting images (**b**) and quantification of LC3-II (**c**) and p62 (**d**) protein  
 142 expression in vehicle (0.1% DMSO) and SAR405-treated aNSCs transfected with LV-GFP or LV-  
 143 NRBF2 ( $n = 6$  independent experiments per group).

144 **e, f** Representative images (**e**) and quantifications (**f**) of proliferating aNSCs transfected with LV-  
 145 GFP or LV-NRBF2, followed by SAR405 treatment and BrdU pulse labeling ( $n = 4$  independent  
 146 experiments per group). White arrows indicating BrdU<sup>+</sup>GFP<sup>+</sup> cells. Scale bars, 30 μm.

147 Data are presented as mean ± SEM and analyzed by two-sided unpaired t test (**a**) or two-way

148 ANOVA following by Bonferroni's post hoc test (**c, d, f**). \* $P < 0.05$ , \*\* $P < 0.01$ , and \*\*\* $P < 0.001$ .

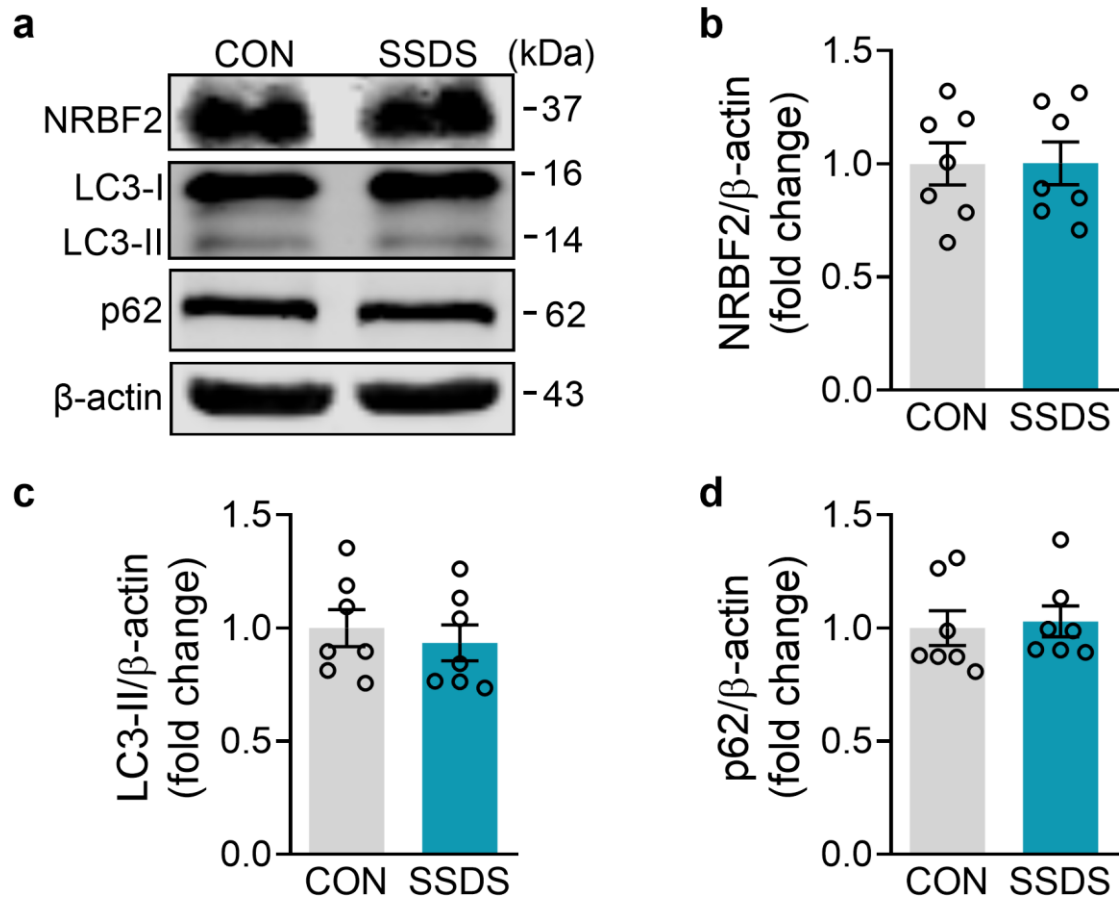

149

150 **Supplementary Fig. S9 Subthreshold social defeat stress does not affect the expression of**  
 151 **NRBF2 in the DG.**

152 **a-d** Representative western blotting images (**a**) and quantification of NRBF2 (**b**), LC3-II (**c**) and  
 153 p62 (**d**) protein expression in control and subthreshold social defeat stress (SSDS)-treated mice ( $n$   
 154 = 7 mice per group).

155 Data are presented as mean  $\pm$  SEM and analyzed by two-sided unpaired t test (**b-d**).



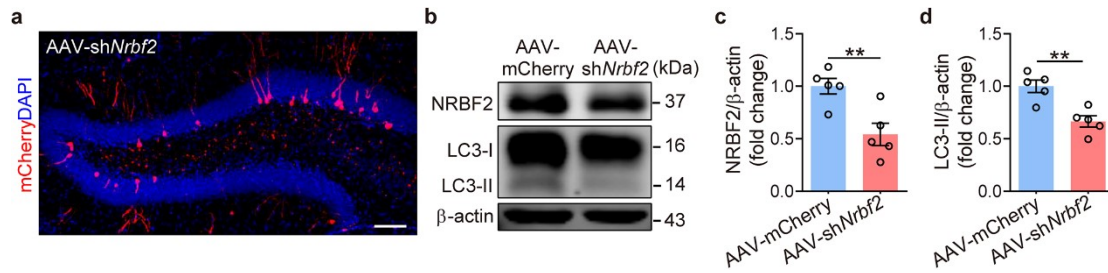

156

157 **Supplementary Fig. S10 Conditional knockdown of NRBF2 in the DG of Nestin-CreER<sup>T2</sup> mice.**

158 **a** Representative image of mCherry<sup>+</sup> cells in the DG of Nestin-CreER<sup>T2</sup> mice that treated with AAV-  
 159 sh*Nrbf2*. Scale bars, 100 μm.

160 **b-d** Western blotting analysis (**b**) and quantifications of NRBF2 (**c**) and LC3-II (**d**) protein  
 161 expression in the DG (*n* = 5 mice per group).

162 Data are presented as mean ± SEM and analyzed by two-sided unpaired t test (**c, d**). \*\**P* < 0.01.

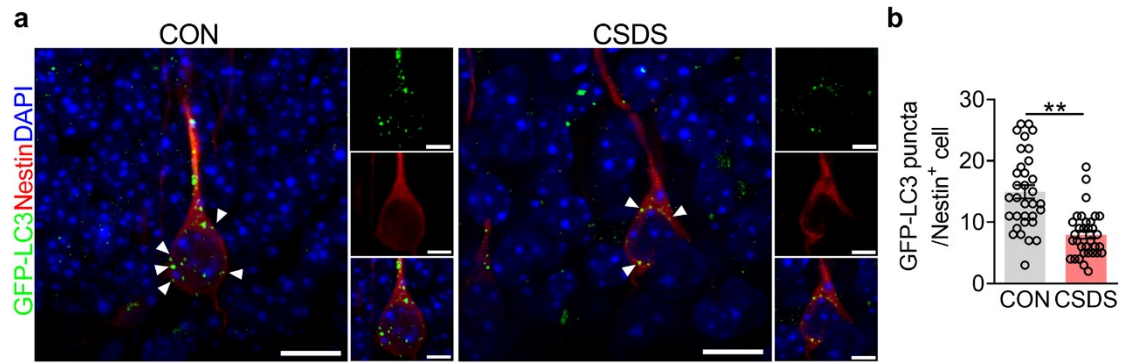

163

164 **Supplementary Fig. S11 Chronic stress leads to the autophagy deficiency of aNSCs in the DG**  
 165 **of CSDS-exposed mice.**

166 **a, b** Representative images of **(a)** and quantifications of GFP-LC3 puncta within the soma of Nestin<sup>+</sup>  
 167 cells in the DG ( $n = 33$  cells per group). Nestin (red) and DAPI (blue). Scale bars, 10 μm (overview)  
 168 and 5 μm (zoom).

169 Data are presented as mean ± SEM and analyzed by two-sided unpaired t test **(b)**. \*\* $P < 0.01$ .

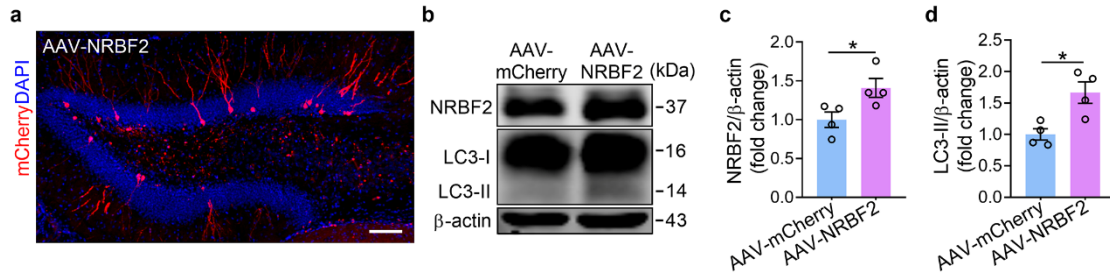

170

171 **Supplementary Fig. S12 Conditional overexpression of NRBF2 in the DG of Nestin-CreER<sup>T2</sup>**  
 172 **mice.**

173 **a** Representative image of mCherry<sup>+</sup> cells in the DG of mice that treated with AAV-NRBF2. Scale  
 174 bars, 100 μm.

175 **b-d** Western blotting analysis (**b**) and quantifications of NRBF2 (**c**) and LC3-II (**d**) protein  
 176 expression in the DG ( $n = 4$  mice per group).

177 Data are presented as mean ± SEM and analyzed by two-sided unpaired t test (**c, d**). \* $P < 0.05$ .

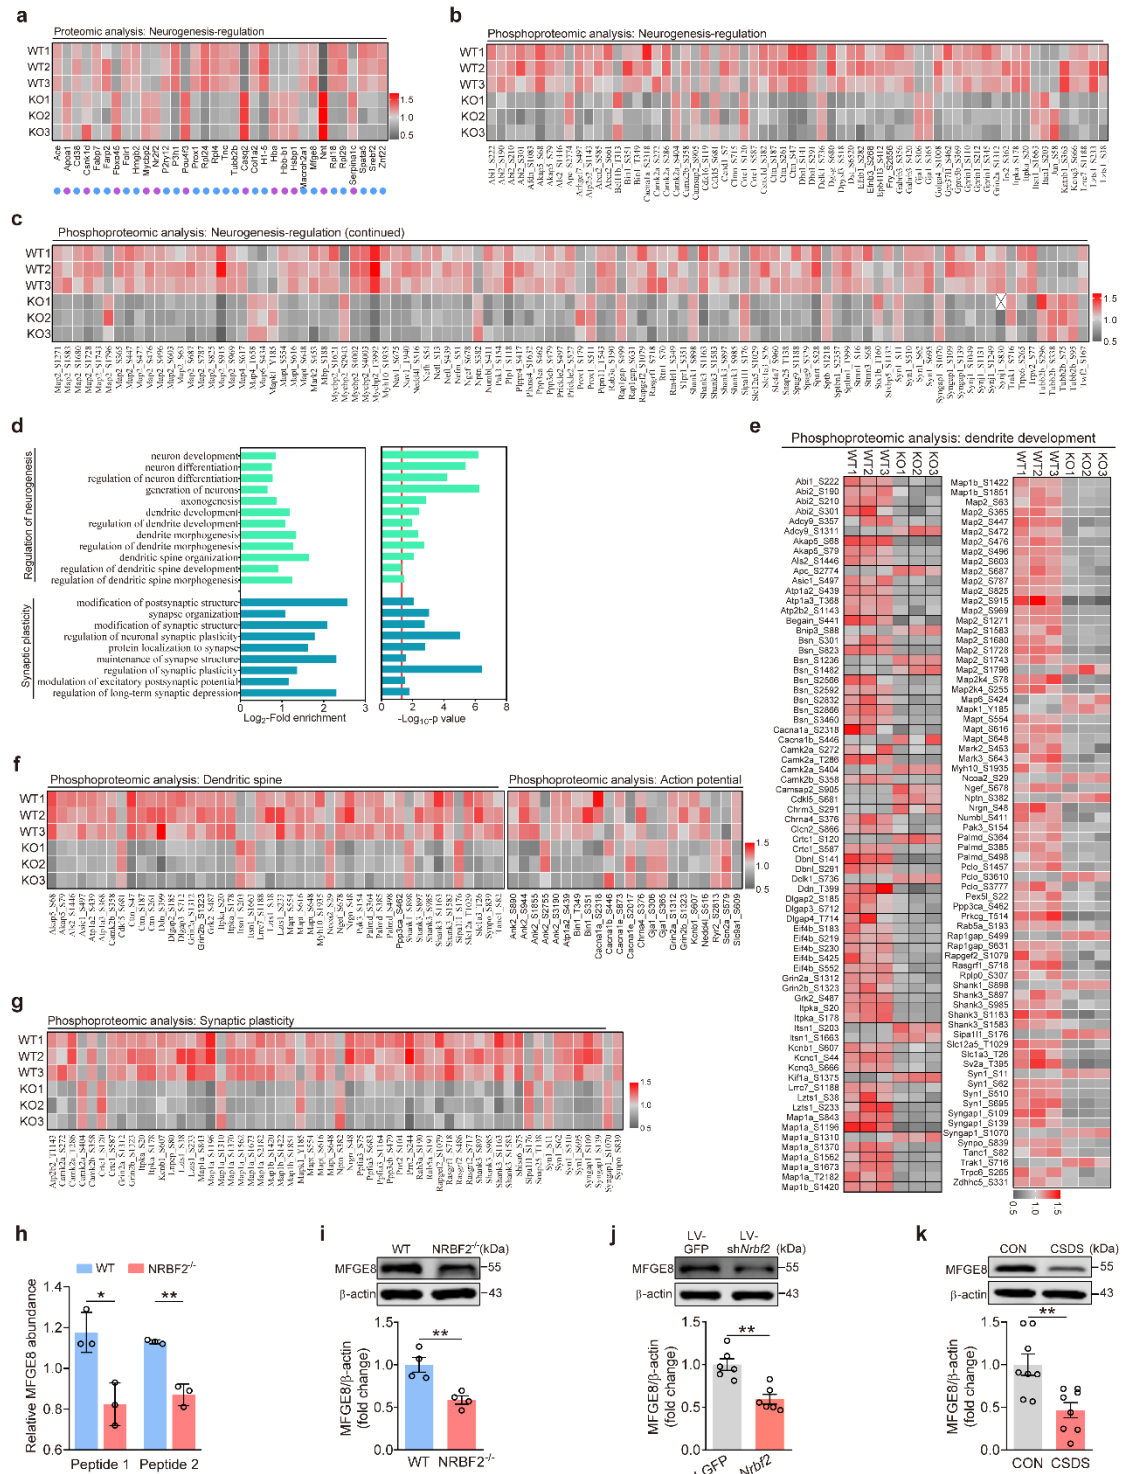

178  
 179 **Supplementary Fig. S13 Deletion of NRBF2 in the DG alters the expression or**  
 180 **phosphorylation of proteins involved in different biological processes.**  
 181 **a** Knockout (KO) of NRBF2 altered the expression of several proteins in the DG involved in the  
 182 biological processes of neurogenesis in proteomic analysis ( $n = 3$  mice per group).  
 183 **b, c** NRBF2 deletion altered the phosphorylation of some proteins involved in the biological process  
 184 of neurogenesis in phosphoproteomic analysis ( $n = 3$  mice per group).  
 185 **d** In bioinformatics analysis, the closely related biological processes were combined to better

186 indicate the alteration of biological processes by NRBF2 deletion, especially, the regulation of  
187 neurogenesis or synapse plasticity. **e** NRBF2 deletion altered the phosphorylation of many proteins  
188 involved in biological processes of dendritic development ( $n = 3$  mice per group).  
189 **f, g** NRBF2 deletion altered the phosphorylation of many proteins involved in biological processes  
190 of dendritic spine (**f**, left), action potential (**f**, right) and synaptic plasticity (**g**) ( $n = 3$  mice per group).  
191 **h** Parallel reaction monitoring proteomics verified the reduce abundance of MFGE8, including  
192 peptide 1 and peptide 2, in the DG of NRBF2<sup>-/-</sup> mice ( $n = 3$  mice per group). Peptide 1:  
193 FELLGCELHGCSEPLGLK; Peptide 2: QVTGIITQGAR.  
194 **i** Western blotting analysis and quantification of MFGE8 protein expression in the DG of WT and  
195 NRBF2<sup>-/-</sup> mice ( $n = 4$  mice per group).  
196 **j** Western blotting analysis and quantification of MFGE8 protein expression in control and NRBF2-  
197 deficient aNSCs ( $n = 6$  independent experiments per group).  
198 **k** Western blotting analysis and quantification of MFGE8 protein expression in the DG of control  
199 and CSDS-exposed mice ( $n = 8$  mice per group).  
200 Data are presented as mean  $\pm$  SEM and analyzed by two-sided unpaired t test (**h-k**). \* $P < 0.05$  and  
201 \*\* $P < 0.01$ .

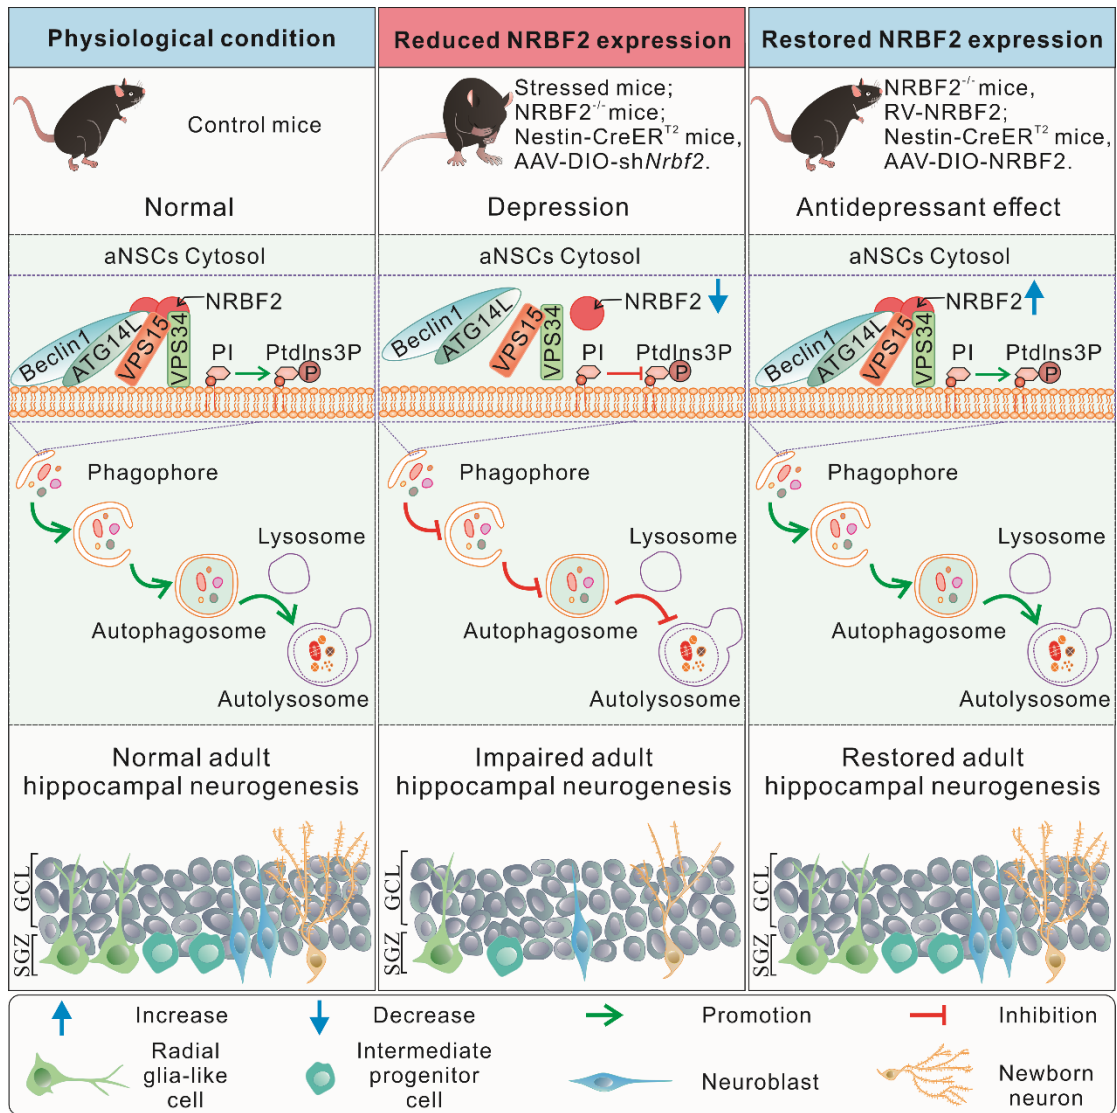

202

203

204

205

206

207

208

209

210

211

212

213

214

**Supplementary Fig. S14 Schematic representation of the aNSCs-specific mechanism of NRBF2 in mediating the impairment of AHN in chronic stress-induced depression.**

The expression of NRBF2 is enriched in the aNSCs and their progeny of dentate gyrus, a hippocampal neurogenic niche. Under normal condition, NRBF2-ATG14L interaction mediates the binding with other components in the cytosol and consequent assembly of activated PtdIns3K complex at the phagophore, synthesizing PtdIns3P by using phosphatidylinositol (PI), resulting in autophagy induction. Chronic stress induces the decrease of NRBF2 in the dentate gyrus. The deficiency of NRBF2 suppresses the PtdIns3K complex activity and autophagosome formation in aNSCs, disrupts the neurogenesis-related protein network, and finally leads to the exhaustion of the aNSCs pool and developmental defects of newborn neurons, which induces depression-like behavior in mice. Importantly, restoring NRBF2 expression in DG aNSCs increases autophagic flux and rescues AHN deficits of NRBF2<sup>-/-</sup> mice and CSDS-exposed mice.

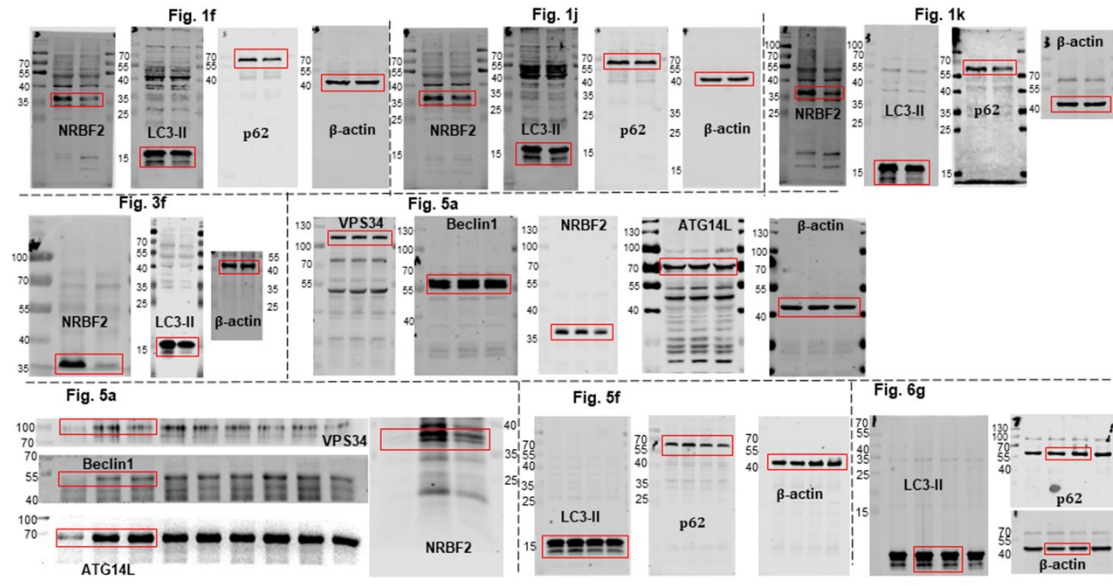

215

216 **Supplementary Fig. S15 Original blots for Fig. 1f, 1j, 1k, 3f, 5a, 5f, and 6g.**

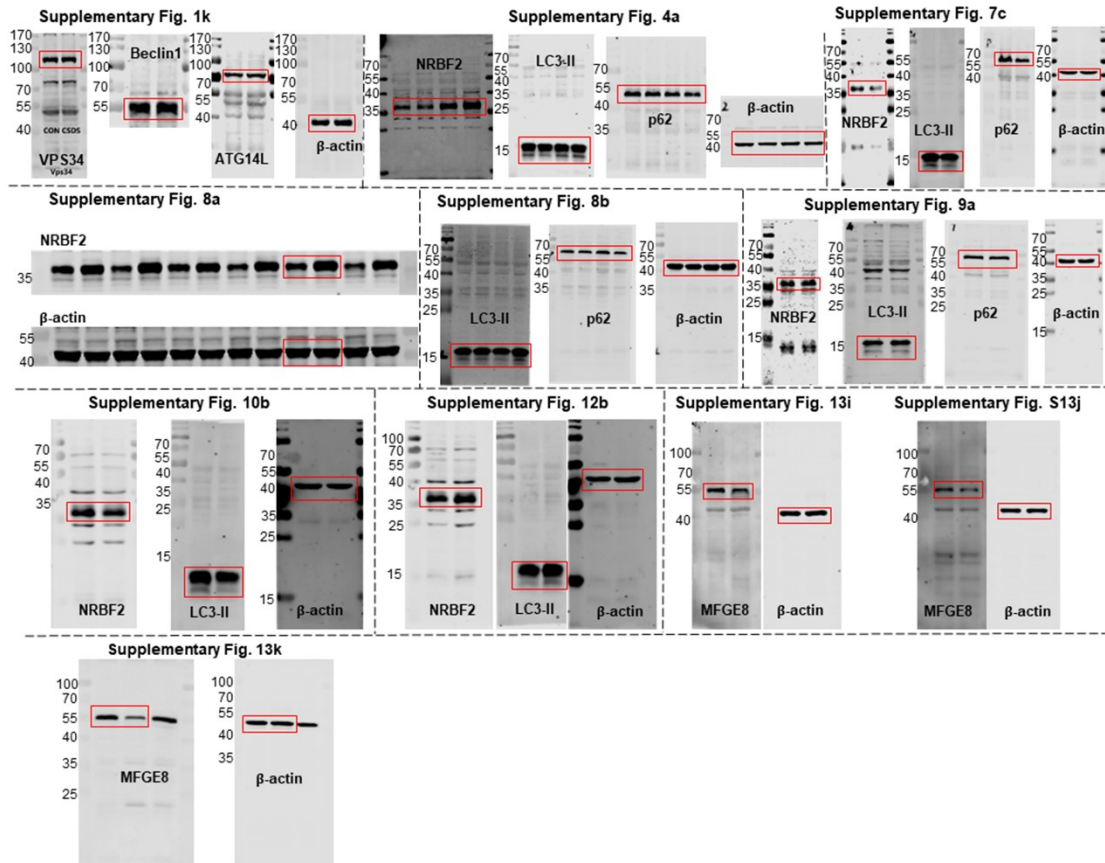

217

218 **Supplementary Fig. S16. Original blots for Fig. S1k, S4a, S7c, S8a, S8b, S9a, S10b, S12b, S13i,**

219 **S13j, and S13k.**



220 **Supplementary Table**

221 Supplementary Table S1. Primers for qPCR analyses.

| Gene          | Primer sequences        |                         |
|---------------|-------------------------|-------------------------|
|               | Forward                 | Reverse                 |
| <i>Nrbf2</i>  | AAGGACCCCTCAACCTTGCT    | CAGTTCCAGTGATAAGTGAGCC  |
| <i>p62</i>    | AGGATGGGGACTTGGTTGC     | TCACAGATCACATTGGGGTGC   |
| <i>Hbb-b1</i> | GCACCTGACTGATGCTGAGAA   | TTCATCGGCGTTCACCTTTC    |
| <i>Nnt</i>    | CTCAGGCTTGTGCTGTGTTG    | CTCGGCCATGCAGGTAAGAA    |
| <i>Pou4f3</i> | ATGCGCCGAGTTTGTCTCC     | GGGCTTGAACGGATGGTTCT    |
| <i>Apoa1</i>  | GGCACGTATGGCAGCAAGAT    | CCAAGGAGGAGGATTCAAACCTG |
| <i>Mfge8</i>  | AGATGCGGGTATCAGGTGTGA   | GGGGCTCAGAACATCCGTG     |
| <i>Fabp7</i>  | GGACACAATGCACATTCAAGAAC | CCGAACCACAGACTTACAGTTT  |
| <i>Farp2</i>  | GTTATTTGACATCGAGCCGAAGT | GAACTCCAGACCAAAGTAGTCAC |
| <i>P3h1</i>   | ACACAAGCTATTGAATGTGCCA  | TTCCCGTTCAGACTTCTGTTTC  |
| <i>Gapdh</i>  | AACGACCCCTTCATTGAC      | TCCACGACATACTCAGCAC     |

222

223 Supplementary Table S2. List of antibodies

| <b>Antibodies</b>                                   | <b>Species</b> | <b>dilution</b> | <b>Supplier</b>                          |
|-----------------------------------------------------|----------------|-----------------|------------------------------------------|
| Anti-ATG14L                                         | Rabbit         | 1:1000 (WB)     | MBL, Cat# PD026                          |
| Anti- $\beta$ -actin                                | Mouse          | 1:3000 (WB)     | Santa Cruz, Cat# sc-517582               |
| Anti-Beclin1                                        | Rabbit         | 1:1000 (WB)     | Novus, Cat# NB110-87318SS                |
| Anti-BrdU                                           | Rat            | 1:1000 (WB)     | Abcam, Cat# ab6126                       |
| Anti-cleaved Caspase3                               | Rabbit         | 1:500 (IF)      | Cell Signaling, Cat# 9661                |
| Anti-DCX                                            | Rabbit         | 1:400 (IF)      | Cell Signaling, Cat# 4604                |
| Anti-GFAP                                           | Mouse          | 1:400 (IF)      | Cell Signaling, Cat# 3670                |
| Anti-GFAP                                           | Rabbit         | 1:200 (IF)      | Proteintech, Cat# 16825-1-AP             |
| Anti-LC3B                                           | Rabbit         | 1:1000 (WB)     | Cell Signaling, Cat# 2775                |
| Anti-LC3                                            | Rabbit         | 1:200 (IF)      | MBL, Cat# PM036                          |
| Anti-MFGE8                                          | Mouse          | 1:1000 (WB)     | Santa Cruz, Cat# sc-33546                |
| Anti-Nestin                                         | Chicken        | 1:500 (JF)      | Aves Labs, Cat# AB_2314882               |
| Anti-NeuN                                           | Rabbit         | 1:500 (IF)      | Abcam, Cat# ab177487                     |
| Anti-NRBF2                                          | Rabbit         | 1:1000 (WB)     | Cell Signaling, Cat# 8066                |
| Anti-NRBF2                                          | Mouse          | 1:200 (IF)      | Santa Cruz, Cat# sc-365213               |
| Anti-RFP                                            | Rabbit         | 1:200 (IF)      | Abcam, Cat# ab62341                      |
| Anti-Sox2                                           | Goat           | 1:200 (IF)      | R&D Systems. Cat# AF2018                 |
| Anti-SQSTM1/p62                                     | Mouse          | 1:1000 (WB)     | Abcam, Cat# ab56416                      |
| Anti-SQSTM1/p62                                     | Mouse          | 1:200 (IF)      | Abcam, Cat# ab56416                      |
| Anti-Tbr2                                           | Rabbit         | 1:200 (IF)      | Abcam, Cat# ab23345                      |
| Anti-Tuj1                                           | Mouse          | 1:500 (IF)      | Proteintech, Cat# 66375-1-Ig             |
| Anti-VPS34                                          | Rabbit         | 1:1000 (WB)     | Proteintech, Cat# 12452-1-AP             |
| Alexa fluor-405-anti-Rat<br>secondary antibody      | Donkey         | 1:1000 (IF)     | Invitrogen, Cat# A48261                  |
| Alexa fluor-488-anti-Rat<br>secondary antibody      | Donkey         | 1:1000 (IF)     | Invitrogen, Cat#A21208                   |
| Alexa fluor-488-anti-Rabbit<br>secondary antibody   | Donkey         | 1:1000 (IF)     | Invitrogen, Cat#A21206                   |
| Alexa fluor-647-anti-Rabbit<br>secondary antibody   | Donkey         | 1:1000 (IF)     | Invitrogen, Cat#A31573                   |
| Alexa fluor-594-anti-<br>Chicken secondary antibody | Donkey         | 1:1000 (IF)     | Jackson ImmunoResearch, Cat# 703-585-155 |
| Alexa fluor-594-anti-Rabbit<br>secondary antibody   | Donkey         | 1:1000 (IF)     | Invitrogen, Cat# A21207                  |
| Alexa fluor-594-anti-Goat<br>secondary antibody     | Donkey         | 1:1000 (IF)     | Invitrogen, Cat# A-11058                 |
| Alexa fluor-594-anti-Mouse<br>secondary antibody    | Donkey         | 1:1000 (IF)     | Invitrogen, Cat# A21203                  |
| Alexa fluor-647-anti-Mouse<br>secondary antibody    | Donkey         | 1:1000 (IF)     | Invitrogen, Cat#A31571                   |

---

|                                               |      |              |                                    |
|-----------------------------------------------|------|--------------|------------------------------------|
| IRDye® LI-COR 800CW<br>anti-Mouse IgG (H + L) | Goat | 1:20000 (WB) | LI-COR Biosciences, Cat# 926-32352 |
| IRDye® 800CW anti-Rabbit<br>IgG (H + L)       | Goat | 1:20000 (WB) | LI-COR Biosciences, Cat# 925-32211 |

---

224

Supplementary Table S3. The statistical information about this study.

| Figures and numbers of animals or cells                                                    | Statistical analysis                                                                                                                                      | Post hoc tests | mean $\pm$ SEM                                                                                                                                             |
|--------------------------------------------------------------------------------------------|-----------------------------------------------------------------------------------------------------------------------------------------------------------|----------------|------------------------------------------------------------------------------------------------------------------------------------------------------------|
| 1b: Number of AVs in DG in CSDS model<br>CON ( $n = 22$ )<br>CSDS ( $n = 18$ )             | Unpaired t test<br>$t = 4.612, P < 0.001$                                                                                                                 |                | CON $2.727 \pm 0.256$<br>CSDS $1.333 \pm 0.114$                                                                                                            |
| 1d: LC3 puncta in DG in CSDS model<br>CON ( $n = 35$ )<br>CSDS ( $n = 38$ )                | Unpaired t test<br>$t = 7.744, P < 0.001$                                                                                                                 |                | CON $12.486 \pm 0.850$<br>CSDS $5.316 \pm 0.420$                                                                                                           |
| 1e: <i>Nrbf2</i> mRNA level in DG in CSDS model<br>CON ( $n = 11$ )<br>CSDS ( $n = 13$ )   | Unpaired t test<br>$t = 4.761, P < 0.001$                                                                                                                 |                | CON $1.014 \pm 0.054$<br>CSDS $0.708 \pm 0.038$                                                                                                            |
| 1g: NRBF2 protein expression in DG in CSDS model<br>CON ( $n = 14$ )<br>CSDS ( $n = 14$ )  | Unpaired t test<br>$t = 4.991, P < 0.001$                                                                                                                 |                | CON $1.000 \pm 0.065$<br>CSDS $0.594 \pm 0.049$                                                                                                            |
| 1h: LC3-II protein expression in DG in CSDS model<br>CON ( $n = 14$ )<br>CSDS ( $n = 14$ ) | Unpaired t test<br>$t = 5.180, P < 0.001$                                                                                                                 |                | CON $1.000 \pm 0.046$<br>CSDS $0.599 \pm 0.062$                                                                                                            |
| 1i: p62 protein expression in DG in CSDS model<br>CON ( $n = 14$ )<br>CSDS ( $n = 14$ )    | Unpaired t test<br>$t = 3.288, P = 0.003$                                                                                                                 |                | CON $1.000 \pm 0.061$<br>CSDS $0.743 \pm 0.049$                                                                                                            |
| 1j: protein expression in DG in CUS model<br>CON ( $n = 13$ )<br>CUS ( $n = 13$ )          | NRBF2: Unpaired t test, $t = 6.710, P < 0.001$<br><br>LC3-II: Unpaired t test, $t = 3.560, P = 0.002$<br><br>p62: Unpaired t test, $t = 3.343, P = 0.003$ |                | CON $1.000 \pm 0.045$<br>CUS $0.654 \pm 0.031$<br><br>CON $1.000 \pm 0.090$<br>CUS $0.643 \pm 0.045$<br><br>CON $1.000 \pm 0.042$<br>CUS $0.776 \pm 0.052$ |

|                                                                                                                                                                                                                                    |                                                                                                                                                                                                      |                                                                                                                                                                                                                                                                                |                                                                                                                                                   |
|------------------------------------------------------------------------------------------------------------------------------------------------------------------------------------------------------------------------------------|------------------------------------------------------------------------------------------------------------------------------------------------------------------------------------------------------|--------------------------------------------------------------------------------------------------------------------------------------------------------------------------------------------------------------------------------------------------------------------------------|---------------------------------------------------------------------------------------------------------------------------------------------------|
| <p>1k: protein expression in DG in CORT model<br/>CON (<i>n</i> = 9)<br/>CORT (<i>n</i> = 11)</p>                                                                                                                                  | <p>NRBF2: Unpaired t test, <i>t</i> = 3.554, <i>P</i> = 0.003</p> <p>LC3-II: Unpaired t test, <i>t</i> = 3.116, <i>P</i> = 0.006</p> <p>p62: Unpaired t test, <i>t</i> = 2.298, <i>P</i> = 0.034</p> |                                                                                                                                                                                                                                                                                | <p>CON 1.000 ± 0.090<br/>CORT 0.646 ± 0.052</p> <p>CON 1.000 ± 0.113<br/>CORT 0.625 ± 0.058</p> <p>CON 1.000 ± 0.135<br/>CUS 0.687 ± 0.056</p>    |
| <p>2b. BrdU<sup>+</sup>Sox2<sup>+</sup>GFAP<sup>+</sup> RGLs after virus injection<br/>CON + LV-vector (<i>n</i> = 3)<br/>CON + LV-NRBF2 (<i>n</i> = 3)<br/>CSDS + LV-vector (<i>n</i> = 3)<br/>CSDS + LV-NRBF2 (<i>n</i> = 3)</p> | <p>Two-way ANOVA:<br/>Stress: F (1, 8) = 6.819, <i>P</i> = 0.031<br/>Virus: F (1, 8) = 48.820, <i>P</i> &lt; 0.001<br/>Stress × Virus: F (1, 8) = 4.483, <i>P</i> = 0.067</p>                        | <p>Bonferroni's post hoc test<br/>CON + LV-vector vs CSDS + LV-vector, <i>P</i> &lt; 0.001;<br/>CON + LV-NRBF2 vs CSDS + LV-NRBF2, <i>P</i> = 0.018;<br/>CON + LV-vector vs CON + LV-NRBF2, <i>P</i> &gt; 0.999;<br/>CSDS + LV-vector vs CSDS + LV-NRBF2, <i>P</i> = 0.020</p> | <p>CON + LV-vector 1495.0 ± 72.111<br/>CON + LV-NRBF2 1530.0 ± 73.993<br/>CSDS + LV-vector 850.0 ± 49.244<br/>CSDS + LV-NRBF2 1185.0 ± 83.516</p> |
| <p>BrdU<sup>+</sup>DCX<sup>+</sup> neuroblasts after virus injection<br/>CON + LV-vector (<i>n</i> = 4)<br/>CON + LV-NRBF2 (<i>n</i> = 4)<br/>CSDS + LV-vector (<i>n</i> = 5)<br/>CSDS + LV-NRBF2 (<i>n</i> = 5)</p>               | <p>Two-way ANOVA:<br/>Stress: F (1, 14) = 19.220, <i>P</i> = 0.001<br/>Virus: F (1, 14) = 37.860, <i>P</i> &lt; 0.001<br/>Stress × Virus: F (1, 14) = 12.150, <i>P</i> = 0.004</p>                   | <p>Bonferroni's post hoc test<br/>CON + LV-vector vs CSDS + LV-vector, <i>P</i> &lt; 0.001;<br/>CON + LV-NRBF2 vs CSDS + LV-NRBF2, <i>P</i> = 0.160;<br/>CON + LV-vector vs CON + LV-NRBF2, <i>P</i> = 0.803;<br/>CSDS + LV-vector vs CSDS + LV-NRBF2, <i>P</i> &lt; 0.001</p> | <p>CON + LV-vector 1102.5 ± 73.072<br/>CON + LV-NRBF2 1152.5 ± 41.105<br/>CSDS + LV-vector 566.0 ± 25.612<br/>CSDS + LV-NRBF2 1004.0 ± 69.036</p> |
| <p>BrdU<sup>+</sup>NeuN<sup>+</sup> neurons after virus injection<br/>CON + LV-vector (<i>n</i> = 3)</p>                                                                                                                           | <p>Two-way ANOVA:<br/>Stress: F (1, 8) = 16.000, <i>P</i> = 0.004<br/>Virus: F (1, 8) =</p>                                                                                                          | <p>Bonferroni's post hoc test<br/>CON + LV-vector vs CSDS + LV-</p>                                                                                                                                                                                                            | <p>CON + LV-vector 1135.0 ± 39.051<br/>CON + LV-NRBF2 1125.0 ± 31.225</p>                                                                         |

|                                                                                                                                                                                                                                            |                                                                                                                                                                                                      |                                                                                                                                                                                                                                                                                               |                                                                                                                                                                                   |
|--------------------------------------------------------------------------------------------------------------------------------------------------------------------------------------------------------------------------------------------|------------------------------------------------------------------------------------------------------------------------------------------------------------------------------------------------------|-----------------------------------------------------------------------------------------------------------------------------------------------------------------------------------------------------------------------------------------------------------------------------------------------|-----------------------------------------------------------------------------------------------------------------------------------------------------------------------------------|
| <p>CON + LV-NRBF2<br/>(<i>n</i> = 3)</p> <p>CSDS + LV-vector<br/>(<i>n</i> = 3)</p> <p>CSDS + LV-NRBF2<br/>(<i>n</i> = 3)</p>                                                                                                              | <p>172.800, <i>P</i> &lt; 0.001</p> <p>Stress × Virus: F (1, 8) = 18.100, <i>P</i> = 0.003</p>                                                                                                       | <p>vector, <i>P</i> &lt; 0.001;</p> <p>CON + LV-NRBF2 vs CSDS + LV-NRBF2, <i>P</i> = 0.001;</p> <p>CON + LV-vector vs CON + LV-NRBF2, <i>P</i> &gt; 0.999;</p> <p>CSDS + LV-vector vs CSDS + LV-NRBF2, <i>P</i> = 0.001</p>                                                                   | <p>CSDS + LV-vector<br/>450.0 ± 52.678</p> <p>CSDS + LV-NRBF2<br/>775.0 ± 30.414</p>                                                                                              |
| <p>2d: RFP-LC3 puncta in the DG after NRBF2 overexpression</p> <p>CON + LV-vector<br/>(<i>n</i> = 36)</p> <p>CON + LV-NRBF2<br/>(<i>n</i> = 35)</p> <p>CSDS + LV-vector<br/>(<i>n</i> = 35)</p> <p>CSDS + LV-NRBF2<br/>(<i>n</i> = 32)</p> | <p>Two-way ANOVA</p> <p>Stress: F (1, 134) = 11.030, <i>P</i> = 0.001</p> <p>Virus: F (1, 134) = 9.814, <i>P</i> = 0.002</p> <p>Stress × virus: F (1, 134) = 0.631, <i>P</i> = 0.428</p>             | <p>Bonferroni's post hoc test</p> <p>CON + LV-vector vs CSDS + LV-vector, <i>P</i> = 0.011;</p> <p>CON + LV-NRBF2 vs CSDS + LV-NRBF2, <i>P</i> = 0.211;</p> <p>CON + LV-vector vs CON + LV-NRBF2, <i>P</i> = 0.144;</p> <p>CSDS + LV-vector vs CSDS + LV-NRBF2, <i>P</i> = 0.010</p>          | <p>CON + LV-vector<br/>14.944 ± 1.051</p> <p>CON + LV-NRBF2<br/>17.371 ± 0.918</p> <p>CSDS + LV-vector<br/>11.171 ± 0.709</p> <p>CSDS + LV-NRBF2<br/>15.125 ± 1.129</p>           |
| <p>2g. Total dendritic length after virus injection</p> <p>CON + LV-vector<br/>(<i>n</i> = 29)</p> <p>CON + LV-NRBF2<br/>(<i>n</i> = 29)</p> <p>CSDS + LV-vector<br/>(<i>n</i> = 33)</p> <p>CSDS + LV-NRBF2<br/>(<i>n</i> = 30)</p>        | <p>Two-way ANOVA:</p> <p>Stress: F (1, 117) = 22.970, <i>P</i> &lt; 0.001</p> <p>Virus: F (1, 117) = 53.260, <i>P</i> &lt; 0.001</p> <p>Stress × virus: F (1, 117) = 16.070, <i>P</i> &lt; 0.001</p> | <p>Bonferroni's post hoc test</p> <p>CON + LV-vector vs CSDS + LV-vector, <i>P</i> &lt; 0.001;</p> <p>CON + LV-NRBF2 vs CSDS + LV-NRBF2, <i>P</i> = 0.047;</p> <p>CON + LV-vector vs CON + LV-NRBF2, <i>P</i> &gt; 0.999;</p> <p>CSDS + LV-vector vs CSDS + LV-NRBF2, <i>P</i> &lt; 0.001</p> | <p>CON + LV-vector<br/>1078.330 ± 35.059</p> <p>CON + LV-NRBF2<br/>1107.072 ± 39.224</p> <p>CSDS + LV-vector<br/>663.663 ± 31.497</p> <p>CSDS + LV-NRBF2<br/>986.461 ± 40.846</p> |
| <p>2h. Number of crossings after virus injection</p> <p>CON + LV-vector<br/>(<i>n</i> = 29)</p> <p>CON + LV-NRBF2</p>                                                                                                                      | <p>Repeated measures ANOVA:</p> <p>Stress: F (1, 60) = 72.700, <i>P</i> &lt; 0.001</p> <p>LV-NRBF2: F (1, 61) =</p>                                                                                  |                                                                                                                                                                                                                                                                                               |                                                                                                                                                                                   |

|                                                                                                                                                                                                     |                                                                                                                                                              |                                                                                                                                                                                                                                                               |                                                                                                                                                                     |
|-----------------------------------------------------------------------------------------------------------------------------------------------------------------------------------------------------|--------------------------------------------------------------------------------------------------------------------------------------------------------------|---------------------------------------------------------------------------------------------------------------------------------------------------------------------------------------------------------------------------------------------------------------|---------------------------------------------------------------------------------------------------------------------------------------------------------------------|
| ( <i>n</i> = 29)<br>CSDS + LV-vector<br>( <i>n</i> = 33)<br>CSDS + LV-NRBF2<br>( <i>n</i> = 30)                                                                                                     | 40.610, <i>P</i> < 0.001                                                                                                                                     |                                                                                                                                                                                                                                                               |                                                                                                                                                                     |
| 2i. Spine density after virus injection<br>CON + LV-vector<br>( <i>n</i> = 33)<br>CON + LV-NRBF2<br>( <i>n</i> = 35)<br>CSDS + LV-vector<br>( <i>n</i> = 37)<br>CSDS + LV-NRBF2<br>( <i>n</i> = 37) | Two-way ANOVA:<br>Stress: $F(1, 138) = 2.410, P = 0.123$<br>Virus: $F(1, 138) = 83.130, P < 0.001$<br>Stress $\times$ virus: $F(1, 138) = 14.510, P < 0.001$ | Bonferroni's post hoc test<br>CON + LV-vector vs CSDS + LV-vector, <i>P</i> < 0.001;<br>CON + LV-NRBF2 vs CSDS + LV-NRBF2, <i>P</i> = 0.001;<br>CON + LV-vector vs CON + LV-NRBF2, <i>P</i> = 0.241;<br>CSDS + LV-vector vs CSDS + LV-NRBF2, <i>P</i> < 0.001 | CON + LV-vector<br>22.299 $\pm$ 1.455<br>CON + LV-NRBF2<br>19.869 $\pm$ 1.187<br>CSDS + LV-vector<br>8.382 $\pm$ 0.686<br>CSDS + LV-NRBF2<br>14.154 $\pm$ 0.920     |
| 2j. SIT after virus injection<br>CON + LV-vector<br>( <i>n</i> = 9)<br>CON + LV-NRBF2<br>( <i>n</i> = 8)<br>CSDS + LV-vector<br>( <i>n</i> = 10)<br>CSDS + LV-NRBF2<br>( <i>n</i> = 14)             | Two-way ANOVA:<br>Stress: $F(1, 37) = 7.532, P = 0.009$<br>Virus: $F(1, 37) = 28.210, P < 0.001$<br>Stress $\times$ virus: $F(1, 37) = 4.582, P = 0.039$     | Bonferroni's post hoc test<br>CON + LV-vector vs CSDS + LV-vector, <i>P</i> < 0.001;<br>CON + LV-NRBF2 vs CSDS + LV-NRBF2, <i>P</i> = 0.057;<br>CON + LV-vector vs CON + LV-NRBF2, <i>P</i> > 0.999;<br>CSDS + LV-vector vs CSDS + LV-NRBF2, <i>P</i> = 0.001 | CON + LV-vector<br>1.165 $\pm$ 0.048<br>CON + LV-NRBF2<br>1.226 $\pm$ 0.077<br>CSDS + LV-vector<br>0.419 $\pm$ 0.061<br>CSDS + LV-NRBF2<br>0.908 $\pm$ 0.124        |
| 2k. TST after virus injection<br>CON + LV-vector<br>( <i>n</i> = 14)<br>CON + LV-NRBF2<br>( <i>n</i> = 14)<br>CSDS + LV-vector<br>( <i>n</i> = 11)<br>CSDS + LV-NRBF2<br>( <i>n</i> = 13)           | Two-way ANOVA:<br>Stress: $F(1, 48) = 6.600, P = 0.013$<br>Virus: $F(1, 48) = 2.964, P = 0.092$<br>Stress $\times$ virus: $F(1, 39) = 11.550, P = 0.001$     | Bonferroni's post hoc test<br>CON + LV-vector vs CSDS + LV-vector, <i>P</i> = 0.002<br>CON + LV-NRBF2 vs CSDS + LV-NRBF2, <i>P</i> = 0.462<br>CON + LV-vector vs CON + LV-                                                                                    | CON + LV-vector<br>86.737 $\pm$ 10.724<br>CON + LV-NRBF2<br>95.172 $\pm$ 8.137<br>CSDS + LV-vector<br>138.788 $\pm$ 12.381<br>CSDS + LV-NRBF2<br>78.121 $\pm$ 9.478 |

|                                                                                                                                                                           |                                                                                                                                                         |                                                                                                                                                                                                                                              |                                                                                                                                                                      |
|---------------------------------------------------------------------------------------------------------------------------------------------------------------------------|---------------------------------------------------------------------------------------------------------------------------------------------------------|----------------------------------------------------------------------------------------------------------------------------------------------------------------------------------------------------------------------------------------------|----------------------------------------------------------------------------------------------------------------------------------------------------------------------|
|                                                                                                                                                                           |                                                                                                                                                         | NRBF2, $P > 0.999$<br>CSDS + LV-vector<br>vs CSDS + LV-<br>NRBF2, $P < 0.001$                                                                                                                                                                |                                                                                                                                                                      |
| 2l. FST after virus injection<br>CON + LV-vector<br>( $n = 15$ )<br>CON + LV-NRBF2<br>( $n = 15$ )<br>CSDS + LV-vector<br>( $n = 12$ )<br>CSDS + LV-NRBF2<br>( $n = 13$ ) | Two-way ANOVA:<br>Stress: $F(1, 51) = 6.435, P = 0.014$<br>Virus: $F(1, 51) = 11.04, P = 0.002$<br>Stress $\times$ virus: $F(1, 51) = 6.224, P = 0.016$ | Bonferroni's post hoc test<br>CON + LV-vector vs CSDS + LV-vector, $P < 0.001$ ;<br>CON + LV-NRBF2 vs CSDS + LV-NRBF2, $P > 0.999$ ;<br>CON + LV-vector vs CON + LV-NRBF2, $P > 0.999$ ;<br>CSDS + LV-vector vs CSDS + LV-NRBF2, $P = 0.003$ | CON + LV-vector<br>$54.337 \pm 8.414$<br>CON + LV-NRBF2<br>$53.885 \pm 10.399$<br>CSDS + LV-vector<br>$117.291 \pm 13.438$<br>CSDS + LV-NRBF2<br>$62.842 \pm 11.310$ |
| 3b: NRBF2 <sup>-/-</sup> mice-SPT<br>WT ( $n = 10$ )<br>NRBF2 <sup>-/-</sup> ( $n = 9$ )                                                                                  | Unpaired t test<br>$t = 4.268, P = 0.001$                                                                                                               |                                                                                                                                                                                                                                              | WT $89.434 \pm 1.972$<br>NRBF2 <sup>-/-</sup> $54.874 \pm 8.274$                                                                                                     |
| 3c: NRBF2 <sup>-/-</sup> mice-TST<br>WT ( $n = 10$ )<br>NRBF2 <sup>-/-</sup> ( $n = 8$ )                                                                                  | Unpaired t test<br>$t = 2.830, P = 0.012$                                                                                                               |                                                                                                                                                                                                                                              | WT $105.676 \pm 11.290$<br>NRBF2 <sup>-/-</sup> $162.248 \pm 17.395$                                                                                                 |
| 3d: NRBF2 <sup>-/-</sup> mice-FST<br>WT ( $n = 10$ )<br>NRBF2 <sup>-/-</sup> ( $n = 9$ )                                                                                  | Unpaired t test<br>$t = 3.789, P = 0.002$                                                                                                               |                                                                                                                                                                                                                                              | WT $89.083 \pm 14.431$<br>NRBF2 <sup>-/-</sup> $161.964 \pm 12.388$                                                                                                  |
| 3e: NRBF2 <sup>-/-</sup> mice-OFT:<br>total distance<br>WT ( $n = 10$ )<br>NRBF2 <sup>-/-</sup> ( $n = 9$ )                                                               | Unpaired t test<br>$t = 0.561, P = 0.582$                                                                                                               |                                                                                                                                                                                                                                              | WT $19.774 \pm 1.030$<br>NRBF2 <sup>-/-</sup> $18.939 \pm 1.074$                                                                                                     |
| 3g: protein expression in DG of NRBF2 <sup>-/-</sup> mice<br><br>WT ( $n = 4$ )<br>NRBF2 <sup>-/-</sup> ( $n = 4$ )                                                       | NRBF2: unpaired t test<br>$t = 14.140, P < 0.001$<br><br>LC3-II: unpaired t test<br>$t = 6.202, P = 0.001$                                              |                                                                                                                                                                                                                                              | WT $1.000 \pm 0.067$<br>NRBF2 <sup>-/-</sup> $0.053 \pm 0.007$<br><br>WT $1.000 \pm 0.063$<br>NRBF2 <sup>-/-</sup> $0.512 \pm 0.047$                                 |
| 3i: LC3 puncta within Nestin <sup>+</sup> cells in DG of NRBF2 <sup>-/-</sup> mice<br>WT ( $n = 25$ )<br>NRBF2 <sup>-/-</sup> ( $n = 29$ )                                | Unpaired t test<br>$t = 5.295, P < 0.001$                                                                                                               |                                                                                                                                                                                                                                              | WT $12.840 \pm 0.984$<br>NRBF2 <sup>-/-</sup> $7.069 \pm 0.552$                                                                                                      |



|                                                                                                                                                                                                                                                                                                                                                                                                                                                         |                                                                                                                                                                                                                                                                                                                                                                                                                                                                                                               |                                                                                                                                                                                                                                                                                                                                                                                                                                                                                                                                                                                                         |                                                                                                                                                                                                                                                                                                                                                                                      |
|---------------------------------------------------------------------------------------------------------------------------------------------------------------------------------------------------------------------------------------------------------------------------------------------------------------------------------------------------------------------------------------------------------------------------------------------------------|---------------------------------------------------------------------------------------------------------------------------------------------------------------------------------------------------------------------------------------------------------------------------------------------------------------------------------------------------------------------------------------------------------------------------------------------------------------------------------------------------------------|---------------------------------------------------------------------------------------------------------------------------------------------------------------------------------------------------------------------------------------------------------------------------------------------------------------------------------------------------------------------------------------------------------------------------------------------------------------------------------------------------------------------------------------------------------------------------------------------------------|--------------------------------------------------------------------------------------------------------------------------------------------------------------------------------------------------------------------------------------------------------------------------------------------------------------------------------------------------------------------------------------|
| <p>3l: BrdU<sup>+</sup>Sox2<sup>+</sup>GFAP<sup>+</sup><br/>RGLs of NRBF2<sup>-/-</sup> mice<br/>WT (<i>n</i> = 5)<br/>NRBF2<sup>-/-</sup> (<i>n</i> = 5)</p> <p>BrdU<sup>+</sup>Tbr2<sup>+</sup> IPCs of<br/>NRBF2<sup>-/-</sup> mice<br/>WT (<i>n</i> = 5)<br/>NRBF2<sup>-/-</sup> (<i>n</i> = 5)</p> <p>BrdU<sup>+</sup>DCX<sup>+</sup> neuroblasts<br/>of NRBF2<sup>-/-</sup> mice<br/>WT (<i>n</i> = 5)<br/>NRBF2<sup>-/-</sup> (<i>n</i> = 5)</p> | <p>Unpaired t test<br/><i>t</i> = 6.305, <i>P</i> = 0.001</p> <p>Unpaired t test<br/><i>t</i> = 5.972, <i>P</i> = 0.001</p> <p>Unpaired t test<br/><i>t</i> = 6.511, <i>P</i> = 0.001</p>                                                                                                                                                                                                                                                                                                                     |                                                                                                                                                                                                                                                                                                                                                                                                                                                                                                                                                                                                         | <p>WT 1398.0 ± 82.89<br/>NRBF2<sup>-/-</sup> 783.0 ± 51.40</p> <p>WT 1326.0 ± 98.32<br/>NRBF2<sup>-/-</sup> 672.0 ± 48.23</p> <p>WT 1190.0 ± 86.96<br/>NRBF2<sup>-/-</sup> 513.0 ± 57.00</p>                                                                                                                                                                                         |
| <p>3o: BrdU<sup>+</sup>NeuN<sup>+</sup> neurons<br/>of NRBF2<sup>-/-</sup> mice<br/>WT (<i>n</i> = 5)<br/>NRBF2<sup>-/-</sup> (<i>n</i> = 5)</p>                                                                                                                                                                                                                                                                                                        | <p>Unpaired t test<br/><i>t</i> = 13.220, <i>P</i> &lt; 0.001</p>                                                                                                                                                                                                                                                                                                                                                                                                                                             |                                                                                                                                                                                                                                                                                                                                                                                                                                                                                                                                                                                                         | <p>WT 1023.0 ± 45.349<br/>NRBF2<sup>-/-</sup> 336.0 ± 25.367</p>                                                                                                                                                                                                                                                                                                                     |
| <p>4b: cOE-SPT<br/>WT + RV-mCherry<br/>(<i>n</i> = 10)<br/>WT + RV-NRBF2<br/>(<i>n</i> = 10)<br/>NRBF2<sup>-/-</sup> + RV-mCherry<br/>(<i>n</i> = 10)<br/>NRBF2<sup>-/-</sup> + RV-NRBF2<br/>(<i>n</i> = 10)</p> <p>cOE-TST:<br/>WT + RV-mCherry<br/>(<i>n</i> = 10)<br/>WT + RV-NRBF2<br/>(<i>n</i> = 10)<br/>NRBF2<sup>-/-</sup> + RV-mCherry<br/>(<i>n</i> = 10)<br/>NRBF2<sup>-/-</sup> + RV-NRBF2</p>                                              | <p>Two-way ANOVA<br/>NRBF2<sup>-/-</sup>: <i>F</i> (1, 36) =<br/>8.806, <i>P</i> = 0.005<br/>RV-NRBF2: <i>F</i> (1, 36) =<br/>15.520, <i>P</i> &lt; 0.001<br/>NRBF2<sup>-/-</sup> × RV-<br/>NRBF2: <i>F</i> (1, 36) =<br/>13.210, <i>P</i> = 0.001</p> <p>Two-way ANOVA<br/>NRBF2<sup>-/-</sup>: <i>F</i> (1, 36) =<br/>15.090, <i>P</i> = 0.001<br/>RV-NRBF2: <i>F</i> (1, 36) =<br/>1.886, <i>P</i> = 0.178<br/>NRBF2<sup>-/-</sup> × RV-<br/>NRBF2: <i>F</i> (1, 36) =<br/>20.700, <i>P</i> &lt; 0.001</p> | <p>Bonferroni's post<br/>hoc test<br/>WT + RV-mCherry<br/>vs NRBF2<sup>-/-</sup> + RV-<br/>mCherry, <i>P</i> &lt; 0.001;<br/>WT + RV-NRBF2<br/>vs NRBF2<sup>-/-</sup> + RV-<br/>NRBF2, <i>P</i> &gt; 0.999;<br/>WT + RV-mCherry<br/>vs WT + RV-<br/>NRBF2, <i>P</i> &gt; 0.999;<br/>NRBF2<sup>-/-</sup> + RV-<br/>mCherry vs<br/>NRBF2<sup>-/-</sup> + RV-<br/>NRBF2, <i>P</i> &lt; 0.001</p> <p>Bonferroni's post<br/>hoc test<br/>WT + RV-mCherry<br/>vs NRBF2<sup>-/-</sup> + RV-<br/>mCherry, <i>P</i> = 0.001;<br/>WT + RV-NRBF2<br/>vs NRBF2<sup>-/-</sup> + RV-<br/>NRBF2, <i>P</i> = 0.062;</p> | <p>WT + RV-mCherry<br/>91.497 ± 0.757<br/>WT + RV-NRBF2<br/>88.593 ± 2.070<br/>NRBF2<sup>-/-</sup> + RV-<br/>mCherry<br/>58.549 ± 7.865<br/>NRBF2<sup>-/-</sup> + RV-NRBF2<br/>87.268 ± 2.994</p> <p>WT + RV-mCherry<br/>91.461 ± 17.229<br/>WT + RV-NRBF2<br/>99.368 ± 10.070<br/>NRBF2<sup>-/-</sup> + RV-<br/>mCherry<br/>161.772 ± 10.889<br/>NRBF2<sup>-/-</sup> + RV-NRBF2</p> |

|                                                                                                                                                                                                                                                                                                                                                                                                              |                                                                                                                                                                                                                                                                                                                                   |                                                                                                                                                                                                                                                                                                                                                                                                                                                                                                   |                                                                                                                                                                                                                                                                        |
|--------------------------------------------------------------------------------------------------------------------------------------------------------------------------------------------------------------------------------------------------------------------------------------------------------------------------------------------------------------------------------------------------------------|-----------------------------------------------------------------------------------------------------------------------------------------------------------------------------------------------------------------------------------------------------------------------------------------------------------------------------------|---------------------------------------------------------------------------------------------------------------------------------------------------------------------------------------------------------------------------------------------------------------------------------------------------------------------------------------------------------------------------------------------------------------------------------------------------------------------------------------------------|------------------------------------------------------------------------------------------------------------------------------------------------------------------------------------------------------------------------------------------------------------------------|
| <p>(<i>n</i> = 10)</p> <p>cOE-FST:<br/>WT + RV-mCherry<br/>(<i>n</i> = 10)<br/>WT + RV-NRBF2<br/>(<i>n</i> = 10)<br/>NRBF2<sup>-/-</sup> + RV-mCherry<br/>(<i>n</i> = 10)<br/>NRBF2<sup>-/-</sup> + RV-NRBF2<br/>(<i>n</i> = 10)</p>                                                                                                                                                                         | <p>Two-way ANOVA<br/>NRBF2<sup>-/-</sup>: F (1, 36) = 9.499, <i>P</i> = 0.004<br/>RV-NRBF2: F (1, 36) = 50.340, <i>P</i> &lt; 0.001<br/>NRBF2<sup>-/-</sup> × RV-NRBF2: F (1, 36) = 2.404, <i>P</i> = 0.130</p>                                                                                                                   | <p>WT + RV-mCherry vs WT + RV-NRBF2, <i>P</i> &gt; 0.999;<br/>NRBF2<sup>-/-</sup> + RV-mCherry vs NRBF2<sup>-/-</sup> + RV-NRBF2, <i>P</i> &lt; 0.001</p> <p>Bonferroni's post hoc test<br/>WT + RV-mCherry vs NRBF2<sup>-/-</sup> + RV-mCherry, <i>P</i> &lt; 0.001;<br/>WT + RV-NRBF2 vs NRBF2<sup>-/-</sup> + RV-NRBF2, <i>P</i> = 0.001;<br/>WT + RV-mCherry vs WT + RV-NRBF2, <i>P</i> = 0.572;<br/>NRBF2<sup>-/-</sup> + RV-mCherry vs NRBF2<sup>-/-</sup> + RV-NRBF2, <i>P</i> = 0.005</p> | <p>61.662 ± 6.834</p> <p>WT + RV-mCherry 57.802 ± 13.554<br/>WT + RV-NRBF2 35.587 ± 9.896<br/>NRBF2<sup>-/-</sup> + RV-mCherry 183.198 ± 15.399<br/>NRBF2<sup>-/-</sup> + RV-NRBF2 116.006 ± 17.967</p>                                                                |
| <p>4d: BrdU<sup>+</sup>Sox2<sup>+</sup>GFAP<sup>+</sup> RGLs of NRBF2<sup>-/-</sup> mice<br/>WT + RV-mCherry<br/>(<i>n</i> = 4)<br/>WT + RV-NRBF2<br/>(<i>n</i> = 4)<br/>NRBF2<sup>-/-</sup> + RV-mCherry<br/>(<i>n</i> = 4)<br/>NRBF2<sup>-/-</sup> + RV-NRBF2<br/>(<i>n</i> = 4)</p> <p>BrdU<sup>+</sup>DCX<sup>+</sup> neuroblasts of NRBF2<sup>-/-</sup> mice<br/>WT + RV-mCherry<br/>(<i>n</i> = 4)</p> | <p>Two-way ANOVA<br/>NRBF2<sup>-/-</sup>: F (1, 12) = 12.690, <i>P</i> = 0.004<br/>RV-NRBF2: F (1, 12) = 50.760, <i>P</i> &lt; 0.001<br/>NRBF2<sup>-/-</sup> × RV-NRBF2: F (1, 12) = 23.310, <i>P</i> &lt; 0.001</p> <p>Two-way ANOVA<br/>NRBF2<sup>-/-</sup>: F (1, 12) = 13.430, <i>P</i> = 0.003<br/>RV-NRBF2: F (1, 12) =</p> | <p>Bonferroni's post hoc test<br/>WT + RV-mCherry vs NRBF2<sup>-/-</sup> + RV-mCherry, <i>P</i> &lt; 0.001;<br/>WT + RV-NRBF2 vs NRBF2<sup>-/-</sup> + RV-NRBF2, <i>P</i> = 0.261;<br/>WT + RV-mCherry vs WT + RV-NRBF2, <i>P</i> = 0.777;<br/>NRBF2<sup>-/-</sup> + RV-mCherry vs NRBF2<sup>-/-</sup> + RV-NRBF2, <i>P</i> &lt; 0.001</p> <p>Bonferroni's post hoc test<br/>WT + RV-mCherry vs NRBF2<sup>-/-</sup> + RV-</p>                                                                     | <p>WT + RV-mCherry 1522.500 ± 102.926<br/>WT + RV-NRBF2 1421.250 ± 58.537<br/>NRBF2<sup>-/-</sup> + RV-mCherry 566.250 ± 63.159<br/>NRBF2<sup>-/-</sup> + RV-NRBF2 1237.500 ± 87.142</p> <p>WT + RV-mCherry 1327.500 ± 67.222<br/>WT + RV-NRBF2 1380.000 ± 125.946</p> |

|                                                                                                                                                                                                                                     |                                                                                                                                                                                                                                                |                                                                                                                                                                                                                                                                                                                                                                  |                                                                                                                                                                                                 |
|-------------------------------------------------------------------------------------------------------------------------------------------------------------------------------------------------------------------------------------|------------------------------------------------------------------------------------------------------------------------------------------------------------------------------------------------------------------------------------------------|------------------------------------------------------------------------------------------------------------------------------------------------------------------------------------------------------------------------------------------------------------------------------------------------------------------------------------------------------------------|-------------------------------------------------------------------------------------------------------------------------------------------------------------------------------------------------|
| NRBF2 <sup>-/-</sup> + RV-mCherry<br>(n = 4)<br>WT + RV-NRBF2<br>(n = 4)<br>NRBF2 <sup>-/-</sup> + RV-NRBF2<br>(n = 4)                                                                                                              | 17.330, <i>P</i> = 0.001<br>NRBF2 <sup>-/-</sup> × RV-<br>NRBF2: <i>F</i> (1, 12) =<br>9.779, <i>P</i> = 0.009                                                                                                                                 | mCherry, <i>P</i> = 0.001<br>WT + RV-NRBF2<br>vs NRBF2 <sup>-/-</sup> + RV-<br>NRBF2, <i>P</i> = 0.956<br>WT + RV-mCherry<br>vs WT + RV-<br>NRBF2, <i>P</i> > 0.999<br>NRBF2 <sup>-/-</sup> + RV-<br>mCherry vs<br>NRBF2 <sup>-/-</sup> + RV-<br>NRBF2, <i>P</i> = 0.001                                                                                         | NRBF2 <sup>-/-</sup> + RV-<br>mCherry<br>615.000 ± 50.867<br>NRBF2 <sup>-/-</sup> + RV-NRBF2<br>1278.750 ± 123.447                                                                              |
| BrdU <sup>+</sup> NeuN <sup>+</sup> neurons of<br>NRBF2 <sup>-/-</sup> mice<br>WT + RV-mCherry<br>(n = 4)<br>NRBF2 <sup>-/-</sup> + RV-mCherry<br>(n = 4)<br>WT + RV-NRBF2<br>(n = 4)<br>NRBF2 <sup>-/-</sup> + RV-NRBF2<br>(n = 4) | Two-way ANOVA<br>NRBF2 <sup>-/-</sup> : <i>F</i> (1, 12) =<br>6.216, <i>P</i> = 0.028<br>RV-NRBF2: <i>F</i> (1, 12) =<br>41.250, <i>P</i> < 0.001<br>NRBF2 <sup>-/-</sup> × RV-<br>NRBF2: <i>F</i> (1, 12) =<br>6.381, <i>P</i> = 0.027        | Bonferroni's post<br>hoc test<br>WT + RV-mCherry<br>vs NRBF2 <sup>-/-</sup> + RV-<br>mCherry, <i>P</i> < 0.001;<br>WT + RV-NRBF2<br>vs NRBF2 <sup>-/-</sup> + RV-<br>NRBF2, <i>P</i> = 0.035;<br>WT + RV-mCherry<br>vs WT + RV-<br>NRBF2, <i>P</i> > 0.999;<br>NRBF2 <sup>-/-</sup> + RV-<br>mCherry vs<br>NRBF2 <sup>-/-</sup> + RV-<br>NRBF2, <i>P</i> = 0.008 | WT + RV-mCherry<br>1065.000 ± 67.639<br>WT + RV-NRBF2<br>1062.500 ± 61.695<br>NRBF2 <sup>-/-</sup> + RV-<br>mCherry<br>387.500 ± 56.771<br>NRBF2 <sup>-/-</sup> + RV-NRBF2<br>767.500 ± 106.409 |
| 4g: Dendritic length of<br>newborn neurons<br>WT + RV-mCherry<br>(n = 49)<br>WT + RV-NRBF2<br>(n = 44)<br>NRBF2 <sup>-/-</sup> + RV-mCherry<br>(n = 41)<br>NRBF2 <sup>-/-</sup> + RV-NRBF2<br>(n = 45)                              | Two-way ANOVA<br>NRBF2 <sup>-/-</sup> : <i>F</i> (1, 175) =<br>127.700, <i>P</i> < 0.001<br>RV-NRBF2: <i>F</i> (1, 175)<br>= 103.700, <i>P</i> < 0.001<br>NRBF2 <sup>-/-</sup> × RV-<br>NRBF2: <i>F</i> (1, 175) =<br>11.640, <i>P</i> = 0.001 | Bonferroni's post<br>hoc test<br>WT + RV-mCherry<br>vs NRBF2 <sup>-/-</sup> + RV-<br>mCherry, <i>P</i> < 0.001;<br>NRBF2 <sup>-/-</sup> + RV-<br>mCherry vs<br>NRBF2 <sup>-/-</sup> + RV-<br>NRBF2, <i>P</i> < 0.001                                                                                                                                             | WT + RV-mCherry<br>968.827 ± 24.809<br>WT + RV-NRBF2<br>1192.521 ± 24.809<br>NRBF2 <sup>-/-</sup> + RV-<br>mCherry<br>632.262 ± 24.104<br>NRBF2 <sup>-/-</sup> + RV-NRBF2<br>1015.899 ± 29.630  |
| 4h: Number of crossings<br>WT + RV-mCherry<br>(n = 49)<br>WT + RV-NRBF2<br>(n = 44)<br>NRBF2 <sup>-/-</sup> + RV-mCherry                                                                                                            | Repeated measures<br>ANOVA<br>NRBF2 <sup>-/-</sup> : <i>F</i> (1, 88) =<br>100.800, <i>P</i> < 0.001<br>RV-NRBF2: <i>F</i> (1, 84) =<br>89.760, <i>P</i> < 0.001                                                                               |                                                                                                                                                                                                                                                                                                                                                                  |                                                                                                                                                                                                 |

|                                                                                                                                                                                                                                        |                                                                                                                                                                                                           |                                                                                                                                                                                                                                                                                                                               |                                                                                                                                                                                  |
|----------------------------------------------------------------------------------------------------------------------------------------------------------------------------------------------------------------------------------------|-----------------------------------------------------------------------------------------------------------------------------------------------------------------------------------------------------------|-------------------------------------------------------------------------------------------------------------------------------------------------------------------------------------------------------------------------------------------------------------------------------------------------------------------------------|----------------------------------------------------------------------------------------------------------------------------------------------------------------------------------|
| ( <i>n</i> = 41)<br>NRBF2 <sup>-/-</sup> + RV-NRBF2<br>( <i>n</i> = 45)                                                                                                                                                                |                                                                                                                                                                                                           |                                                                                                                                                                                                                                                                                                                               |                                                                                                                                                                                  |
| 4i: Spine density of newborn neurons<br>WT + RV-mCherry<br>( <i>n</i> = 46)<br>WT + RV-NRBF2<br>( <i>n</i> = 45)<br>NRBF2 <sup>-/-</sup> + RV-mCherry<br>( <i>n</i> = 44)<br>NRBF2 <sup>-/-</sup> + RV-NRBF2<br>( <i>n</i> = 48)       | Two-way ANOVA<br>NRBF2 <sup>-/-</sup> : F (1, 179) = 11.210, <i>P</i> = 0.001<br>RV-NRBF2: F (1, 179) = 66.080, <i>P</i> < 0.001<br>NRBF2 <sup>-/-</sup> × RV-NRBF2: F (1, 179) = 2.282, <i>P</i> = 0.133 | Bonferroni's post hoc test<br>WT + RV-mCherry vs NRBF2 <sup>-/-</sup> + RV-mCherry, <i>P</i> < 0.001;<br>WT + RV-NRBF2 vs NRBF2 <sup>-/-</sup> + RV-NRBF2, <i>P</i> < 0.001;<br>WT + RV-mCherry vs WT + RV-NRBF2, <i>P</i> = 0.393;<br>NRBF2 <sup>-/-</sup> + RV-mCherry vs NRBF2 <sup>-/-</sup> + RV-NRBF2, <i>P</i> = 0.001 | WT + RV-mCherry<br>17.403 ± 0.833<br>WT + RV-NRBF2<br>18.802 ± 0.913<br>NRBF2 <sup>-/-</sup> + RV-mCherry<br>10.063 ± 0.584<br>NRBF2 <sup>-/-</sup> + RV-NRBF2<br>13.762 ± 0.670 |
| 5b: NRBF2: ATG14L<br>LV-GFP ( <i>n</i> = 7)<br>LV-sh <i>Nrbf2</i> ( <i>n</i> = 7)                                                                                                                                                      | Unpaired t test<br><i>t</i> = 6.302, <i>P</i> < 0.001                                                                                                                                                     |                                                                                                                                                                                                                                                                                                                               | LV-GFP 1.000 ± 0.050<br>LV-sh <i>Nrbf2</i> 0.599 ± 0.039                                                                                                                         |
| 5c: VPS34: ATG14L<br>LV-GFP ( <i>n</i> = 7)<br>LV-sh <i>Nrbf2</i> ( <i>n</i> = 7)                                                                                                                                                      | Unpaired t test<br><i>t</i> = 2.971, <i>P</i> = 0.012                                                                                                                                                     |                                                                                                                                                                                                                                                                                                                               | LV-GFP 1.000 ± 0.117<br>LV-sh <i>Nrbf2</i> 0.582 ± 0.077                                                                                                                         |
| 5d: Beclin1: ATG14L<br>LV-GFP ( <i>n</i> = 7)<br>LV-sh <i>Nrbf2</i> ( <i>n</i> = 7)                                                                                                                                                    | Unpaired t test<br><i>t</i> = 1.133, <i>P</i> = 0.280                                                                                                                                                     |                                                                                                                                                                                                                                                                                                                               | LV-GFP 1.000 ± 0.041<br>LV-sh <i>Nrbf2</i> 0.939 ± 0.035                                                                                                                         |
| 5e: Ptdlns3P level in NRBF2-deficient aNSCs<br>LV-GFP ( <i>n</i> = 8)<br>LV-sh <i>Nrbf2</i> ( <i>n</i> = 8)                                                                                                                            | Unpaired t test<br><i>t</i> = 4.800, <i>P</i> < 0.001                                                                                                                                                     |                                                                                                                                                                                                                                                                                                                               | LV-GFP 1.182 ± 0.105<br>LV-sh <i>Nrbf2</i> 0.504 ± 0.094                                                                                                                         |
| 5g: LC3-II protein expression in NRBF2-deficient aNSCs<br>LV-GFP + Vehicle<br>( <i>n</i> = 9)<br>LV-GFP + BafA1<br>( <i>n</i> = 9)<br>LV-sh <i>Nrbf2</i> + Vehicle<br>( <i>n</i> = 9)<br>LV-sh <i>Nrbf2</i> + BafA1<br>( <i>n</i> = 9) | Two-way ANOVA<br>LV-sh <i>Nrbf2</i> :<br>F (1, 32) = 19.610, <i>P</i> < 0.001<br>BafA1: F (1, 32) = 59.740, <i>P</i> < 0.001<br>LV-sh <i>Nrbf2</i> × BafA1:<br>F (1, 32) = 12.500, <i>P</i> = 0.001       | Bonferroni's post hoc test<br>LV-GFP + Vehicle vs LV-sh <i>Nrbf2</i> + Vehicle, <i>P</i> = 0.011;<br>LV-GFP + BafA1 vs LV-sh <i>Nrbf2</i> + BafA1, <i>P</i> < 0.001;<br>LV-GFP + Vehicle vs LV-GFP + BafA1, <i>P</i> < 0.001;<br>LV-sh <i>Nrbf2</i> + BafA1 vs LV-sh <i>Nrbf2</i> + BafA1, <i>P</i> < 0.001;                  | LV-GFP + Vehicle<br>1.000 ± 0.029<br>LV-GFP + BafA1<br>1.554 ± 0.122<br>LV-sh <i>Nrbf2</i> + Vehicle<br>0.708 ± 0.035<br>LV-sh <i>Nrbf2</i> + BafA1<br>0.770 ± 0.049             |

|                                                                                                                                                                                                         |                                                                                                                                                                                                 |                                                                                                                                                                                                                                                                                              |                                                                                                                                                                                      |
|---------------------------------------------------------------------------------------------------------------------------------------------------------------------------------------------------------|-------------------------------------------------------------------------------------------------------------------------------------------------------------------------------------------------|----------------------------------------------------------------------------------------------------------------------------------------------------------------------------------------------------------------------------------------------------------------------------------------------|--------------------------------------------------------------------------------------------------------------------------------------------------------------------------------------|
|                                                                                                                                                                                                         |                                                                                                                                                                                                 | Vehicle vs LV-sh <i>Nrbf2</i> + BafA1, $P > 0.999$                                                                                                                                                                                                                                           |                                                                                                                                                                                      |
| 5h: p62 protein expression in NRBF2-deficient aNSCs<br>LV-GFP + Vehicle ( $n = 9$ )<br>LV-GFP + BafA1 ( $n = 9$ )<br>LV-sh <i>Nrbf2</i> + Vehicle ( $n = 9$ )<br>LV-sh <i>Nrbf2</i> + BafA1 ( $n = 9$ ) | Two-way ANOVA<br>LV-sh <i>Nrbf2</i> :<br>$F(1, 32) = 12.670$ ,<br>$P = 0.001$<br>BafA1: $F(1, 32) = 59.310$ , $P < 0.001$<br>LV-sh <i>Nrbf2</i> × BafA1:<br>$F(1, 32) = 5.008$ ,<br>$P = 0.032$ | Bonferroni's post hoc test<br>LV-GFP + Vehicle vs LV-sh <i>Nrbf2</i> + Vehicle, $P = 0.001$ ;<br>LV-GFP + BafA1 vs LV-sh <i>Nrbf2</i> + BafA1, $P < 0.001$ ;<br>LV-GFP + Vehicle vs LV-GFP + BafA1, $P < 0.001$ ;<br>LV-sh <i>Nrbf2</i> + Vehicle vs LV-sh <i>Nrbf2</i> + BafA1, $P = 0.714$ | LV-GFP + Vehicle<br>$1.000 \pm 0.037$<br>LV-GFP + BafA1<br>$1.268 \pm 0.063$<br>LV-sh <i>Nrbf2</i> + Vehicle<br>$0.747 \pm 0.037$<br>LV-sh <i>Nrbf2</i> + BafA1<br>$0.808 \pm 0.042$ |
| 5j: GFP-RFP-LC3 puncta in NRBF2 KD aNSCs<br>CON + Vehicle ( $n = 25$ )<br>CON + BafA1 ( $n = 21$ )<br>NRBF2 KD + Vehicle ( $n = 25$ )<br>NRBF2 KD + BafA1 ( $n = 25$ )                                  | Two-way ANOVA<br>NRBF2 KD:<br>$F(1, 92) = 20.330$ ,<br>$P < 0.001$<br>BafA1: $F(1, 92) = 78.080$ , $P < 0.001$<br>NRBF2 KD × BafA1:<br>$F(1, 92) = 14.920$ ,<br>$P < 0.001$                     | Bonferroni's post hoc test<br>CON + Vehicle vs NRBF2 KD + Vehicle, $P = 0.001$ ;<br>CON + BafA1 vs NRBF2 KD + BafA1, $P < 0.001$ ;<br>CON + Vehicle vs CON + BafA1, $P < 0.001$ ;<br>NRBF2 KD + Vehicle vs NRBF2 KD + BafA1, $P > 0.999$                                                     | CON + Vehicle<br>$32.320 \pm 2.153$<br>CON + BafA1<br>$55.143 \pm 4.809$<br>NRBF2 KD + Vehicle<br>$18.760 \pm 1.740$<br>NRBF2 KD + BafA1<br>$20.520 \pm 1.829$                       |
| 5k: RFP-LC3 puncta in NRBF2 KD aNSCs<br>CON + Vehicle ( $n = 25$ )<br>CON + BafA1 ( $n = 21$ )<br>NRBF2 KD + Vehicle ( $n = 25$ )<br>NRBF2 KD + BafA1 ( $n = 25$ )                                      | Two-way ANOVA<br>NRBF2 KD:<br>$F(1, 92) = 6.010$ ,<br>$P = 0.016$<br>BafA1: $F(1, 92) = 104.600$ , $P < 0.001$<br>NRBF2 KD × BafA1:<br>$F(1, 92) = 6.824$ ,<br>$P = 0.011$                      | Bonferroni's post hoc test<br>CON + Vehicle vs NRBF2 KD + Vehicle, $P < 0.001$ ;<br>CON + BafA1 vs NRBF2 KD + BafA1, $P < 0.001$ ;<br>CON + Vehicle vs CON + BafA1,                                                                                                                          | CON + Vehicle<br>$48.760 \pm 2.727$<br>CON + BafA1<br>$65.143 \pm 5.647$<br>NRBF2 KD + Vehicle<br>$24.120 \pm 2.001$<br>NRBF2 KD + BafA1<br>$23.600 \pm 2.129$                       |

|                                                                                                                                        |                                                                                                                                                                                  |                                                                                                                                                                                                                                                         |                                                                                                                                                                |
|----------------------------------------------------------------------------------------------------------------------------------------|----------------------------------------------------------------------------------------------------------------------------------------------------------------------------------|---------------------------------------------------------------------------------------------------------------------------------------------------------------------------------------------------------------------------------------------------------|----------------------------------------------------------------------------------------------------------------------------------------------------------------|
|                                                                                                                                        |                                                                                                                                                                                  | $P = 0.001$ ;<br>NRBF2 KD +<br>Vehicle vs NRBF2<br>KD + BafA1,<br>$P > 0.999$                                                                                                                                                                           |                                                                                                                                                                |
| 6b: SAR405-SIT<br>Vehicle + CON ( $n = 10$ )<br>SAR405 + CON ( $n = 10$ )<br>Vehicle + SSDS ( $n = 9$ )<br>SAR405 + SSDS ( $n = 12$ )  | Two-way ANOVA<br>SSDS:<br>$F(1, 37) = 13.830$ ,<br>$P = 0.001$<br>SAR405: $F(1, 37) =$<br>$12.880$ , $P = 0.001$<br>SSDS $\times$ SAR405:<br>$F(1, 37) = 7.686$ ,<br>$P = 0.009$ | Bonferroni's post<br>hoc test<br>CON + Vehicle vs<br>SSDS + Vehicle,<br>$P > 0.999$ ;<br>CON + SAR405 vs<br>SSDS + SAR405,<br>$P < 0.001$ ;<br>Vehicle + CON vs<br>SAR405 + CON,<br>$P > 0.999$ ;<br>Vehicle + SSDS vs<br>SAR405 + SSDS,<br>$P < 0.001$ | Vehicle + CON<br>$1.282 \pm 0.110$<br>SAR405 + CON<br>$1.180 \pm 0.128$<br>Vehicle + SSDS<br>$1.194 \pm 0.094$<br>SAR405 + SSDS<br>$0.496 \pm 0.093$           |
| 6c: SAR405-SPT<br>Vehicle + CON ( $n = 10$ )<br>SAR405 + CON ( $n = 10$ )<br>Vehicle + SSDS ( $n = 10$ )<br>SAR405 + SSDS ( $n = 12$ ) | Two-way ANOVA<br>SSDS:<br>$F(1, 38) = 10.480$ ,<br>$P = 0.003$<br>SAR405: $F(1, 38) =$<br>$6.361$ , $P = 0.016$<br>SSDS $\times$ SAR405:<br>$F(1, 38) = 7.100$ ,<br>$P = 0.011$  | Bonferroni's post<br>hoc test<br>CON + Vehicle vs<br>SSDS + Vehicle,<br>$P > 0.999$ ;<br>CON + SAR405 vs<br>SSDS + SAR405,<br>$P = 0.001$ ;<br>Vehicle + CON vs<br>SAR405 + CON,<br>$P > 0.999$ ;<br>Vehicle + SSDS vs<br>SAR405 + SSDS,<br>$P < 0.001$ | Vehicle + CON<br>$85.043 \pm 1.446$<br>SAR405 + CON<br>$83.168 \pm 2.141$<br>Vehicle + SSDS<br>$85.510 \pm 1.832$<br>SAR405 + SSDS<br>$66.210 \pm 5.028$       |
| 6d: SAR405-TST<br>Vehicle + CON ( $n = 10$ )<br>SAR405 + CON ( $n = 10$ )<br>Vehicle + SSDS ( $n = 10$ )<br>SAR405 + SSDS ( $n = 12$ ) | Two-way ANOVA<br>SSDS:<br>$F(1, 38) = 6.871$ ,<br>$P = 0.013$<br>SAR405: $F(1, 38) =$<br>$7.541$ , $P = 0.009$<br>SSDS $\times$ SAR405:<br>$F(1, 38) = 3.228$ ,<br>$P = 0.080$   | Bonferroni's post<br>hoc test<br>CON + Vehicle vs<br>SSDS + Vehicle,<br>$P > 0.999$ ;<br>CON + SAR405 vs<br>SSDS + SAR405,<br>$P = 0.004$ ;<br>Vehicle + CON vs<br>SAR405 + CON,                                                                        | Vehicle + CON<br>$98.007 \pm 9.866$<br>SAR405 + CON<br>$111.748 \pm 10.494$<br>Vehicle + SSDS<br>$113.827 \pm 22.075$<br>SAR405 + SSDS<br>$187.446 \pm 18.985$ |

|                                                                                                                                       |                                                                                                                                                                            |                                                                                                                                                                                                                              |                                                                                                                                                               |
|---------------------------------------------------------------------------------------------------------------------------------------|----------------------------------------------------------------------------------------------------------------------------------------------------------------------------|------------------------------------------------------------------------------------------------------------------------------------------------------------------------------------------------------------------------------|---------------------------------------------------------------------------------------------------------------------------------------------------------------|
|                                                                                                                                       |                                                                                                                                                                            | $P > 0.999$ ;<br>Vehicle + SSDS vs<br>SAR405 + SSDS,<br>$P = 0.006$                                                                                                                                                          |                                                                                                                                                               |
| 6e: SAR405-FST<br>Vehicle + CON ( $n = 10$ )<br>SAR405 + CON ( $n = 10$ )<br>Vehicle + SSDS ( $n = 9$ )<br>SAR405 + SSDS ( $n = 12$ ) | Two-way ANOVA<br>SSDS:<br>$F(1, 37) = 11.350$ ,<br>$P = 0.002$<br>SAR405: $F(1, 37) = 7.692$ , $P = 0.009$<br>SSDS $\times$ SAR405:<br>$F(1, 37) = 1.728$ ,<br>$P = 0.197$ | Bonferroni's post hoc test<br>CON + Vehicle vs SSDS + Vehicle, $P = 0.545$ ;<br>CON + SAR405 vs SSDS + SAR405, $P = 0.010$ ;<br>Vehicle + CON vs SAR405 + CON, $P = 0.315$ ;<br>Vehicle + SSDS vs SAR405 + SSDS, $P = 0.004$ | Vehicle + CON<br>$83.174 \pm 12.726$<br>SAR405 + CON<br>$105.786 \pm 11.063$<br>Vehicle + SSDS<br>$99.228 \pm 13.168$<br>SAR405 + SSDS<br>$150.763 \pm 7.459$ |
| 6f: SAR405-OFT<br>Vehicle + CON ( $n = 10$ )<br>SAR405 + CON ( $n = 10$ )<br>Vehicle + SSDS ( $n = 9$ )<br>SAR405 + SSDS ( $n = 12$ ) | Two-way ANOVA<br>SSDS:<br>$F(1, 37) = 0.272$ ,<br>$P = 0.605$<br>SAR405: $F(1, 37) = 0.683$ , $P = 0.414$<br>SSDS $\times$ SAR405:<br>$F(1, 37) = 0.224$ ,<br>$P = 0.639$  | Bonferroni's post hoc test<br>CON + Vehicle vs SSDS + Vehicle, $P > 0.999$ ;<br>CON + SAR405 vs SSDS + SAR405, $P = 0.694$ ;<br>Vehicle + CON vs SAR405 + CON, $P = 0.979$ ;<br>Vehicle + SSDS vs SAR405 + SSDS, $P > 0.999$ | Vehicle + CON<br>$34.494 \pm 2.123$<br>SAR405 + CON<br>$32.295 \pm 2.338$<br>Vehicle + SSDS<br>$35.276 \pm 2.714$<br>SAR405 + SSDS<br>$35.168 \pm 1.754$      |
| 6h: LC3-II expression in the DG of SAR405-treated mice<br>Vehicle + SSDS ( $n = 7$ )<br>SAR405 + SSDS ( $n = 7$ )                     | Unpaired t test<br>$t = 2.440$ , $P = 0.031$                                                                                                                               |                                                                                                                                                                                                                              | Vehicle + SSDS<br>$1.000 \pm 0.116$<br>SAR405 + SSDS<br>$0.675 \pm 0.066$                                                                                     |
| 6i: p62 expression in the DG of SAR405-treated mice<br>Vehicle + SSDS ( $n = 7$ )<br>SAR405 + SSDS ( $n = 7$ )                        | Unpaired t test<br>$t = 2.453$ , $P = 0.030$                                                                                                                               |                                                                                                                                                                                                                              | Vehicle + SSDS<br>$1.000 \pm 0.077$<br>SAR405 + SSDS<br>$1.386 \pm 0.138$                                                                                     |
| 6l: BrdU <sup>+</sup> Sox2 <sup>+</sup> GFAP <sup>+</sup>                                                                             | Unpaired t test                                                                                                                                                            |                                                                                                                                                                                                                              | Vehicle + SSDS                                                                                                                                                |

|                                                                                                                                                |                                           |  |                                                                          |
|------------------------------------------------------------------------------------------------------------------------------------------------|-------------------------------------------|--|--------------------------------------------------------------------------|
| RGLs in the DG of SAR405-treated mice<br>Vehicle + SSDS ( <i>n</i> = 4)<br>SAR405 + SSDS ( <i>n</i> = 4)                                       | $t = 3.720, P = 0.010$                    |  | 1380.000 ± 50.867<br>SAR405 + SSDS<br>776.250 ± 154.115                  |
| BrdU <sup>+</sup> DCX <sup>+</sup> neuroblasts in DG of SAR405-treated mice<br>Vehicle + SSDS ( <i>n</i> = 6)<br>SAR405 + SSDS ( <i>n</i> = 6) | Unpaired t test<br>$t = 3.938, P = 0.003$ |  | Vehicle + SSDS<br>1168.333 ± 61.936<br>SAR405 + SSDS<br>825.000 ± 61.360 |
| 7b: cKD-SPT<br>CON ( <i>n</i> = 8)<br>cKD ( <i>n</i> = 10)                                                                                     | Unpaired t test<br>$t = 3.505, P = 0.003$ |  | CON 88.712 ± 2.643<br>cKD 72.238 ± 3.621                                 |
| 7c: cKD-TST<br>CON ( <i>n</i> = 8)<br>cKD ( <i>n</i> = 10)                                                                                     | Unpaired t test<br>$t = 2.595, P = 0.020$ |  | CON 98.053 ± 19.978<br>cKD 151.101 ± 9.050                               |
| 7d: cKD-FST<br>CON ( <i>n</i> = 8)<br>cKD ( <i>n</i> = 10)                                                                                     | Unpaired t test<br>$t = 3.890, P = 0.001$ |  | CON 50.743 ± 13.892<br>cKD 134.207 ± 15.610                              |
| 7e: cKD-OFT: total distance<br>CON ( <i>n</i> = 8)<br>cKD ( <i>n</i> = 10)                                                                     | Unpaired t test<br>$t = 0.661, P = 0.518$ |  | CON 39.939 ± 2.223<br>cKD 37.470 ± 2.819                                 |
| 7h: BrdU <sup>+</sup> Sox2 <sup>+</sup> GFAP <sup>+</sup> RGLs of NRBF2 cKD mice<br>CON ( <i>n</i> = 4)<br>cKD ( <i>n</i> = 4)                 | Unpaired t test<br>$t = 5.966, P = 0.001$ |  | CON 1380.00 ± 113.80<br>cKD 615.00 ± 59.09                               |
| BrdU <sup>+</sup> DCX <sup>+</sup> neuroblasts of NRBF2 cKD mice<br>CON ( <i>n</i> = 4)<br>cKD ( <i>n</i> = 4)                                 | Unpaired t test<br>$t = 5.832, P = 0.001$ |  | CON 1412.50 ± 140.26<br>cKD 590.00 ± 14.72                               |
| BrdU <sup>+</sup> NeuN <sup>+</sup> neurons of NRBF2 cKD mice<br>CON ( <i>n</i> = 4)<br>cKD ( <i>n</i> = 4)                                    | Unpaired t test<br>$t = 4.681, P = 0.003$ |  | CON 1267.50 ± 108.94<br>cKD 723.75 ± 40.33                               |
| 7i: Membrane potential<br>CON ( <i>n</i> = 26)<br>cKD ( <i>n</i> = 22)                                                                         | Unpaired t test<br>$t = 0.105, P = 0.917$ |  | CON -63.148 ± 1.358<br>cKD -63.329 ± 0.934                               |



|                                                                                                                                                                   |                                                                                                                                                                               |                                                                                                                                                                                                                                                          |                                                                                                                                                                                                                                                                                                                                                                        |
|-------------------------------------------------------------------------------------------------------------------------------------------------------------------|-------------------------------------------------------------------------------------------------------------------------------------------------------------------------------|----------------------------------------------------------------------------------------------------------------------------------------------------------------------------------------------------------------------------------------------------------|------------------------------------------------------------------------------------------------------------------------------------------------------------------------------------------------------------------------------------------------------------------------------------------------------------------------------------------------------------------------|
| 7j: Membrane resistance<br>CON ( <i>n</i> = 26)<br>cKD ( <i>n</i> = 22)                                                                                           | Unpaired t test<br>$t = 1.576, P = 0.122$                                                                                                                                     |                                                                                                                                                                                                                                                          | CON $238.513 \pm 20.959$<br>cKD $189.985 \pm 22.531$                                                                                                                                                                                                                                                                                                                   |
| 7l: AP frequency<br>CON ( <i>n</i> = 26)<br>cKD ( <i>n</i> = 22)                                                                                                  | Two-way ANOVA<br>Current injection: $F(5, 276) = 39.680, P < 0.001$<br>cKD: $F(1, 276) = 41.910, P < 0.001$<br>Current injection $\times$ cKD: $F(5, 276) = 1.725, P < 0.128$ | Bonferroni's post hoc test<br>0 pA: CON vs cKD, $P > 0.999$<br>30 pA: CON vs cKD, $P = 0.632$<br>60 pA: CON vs cKD, $P = 0.042$<br>90 pA: CON vs cKD, $P = 0.002$<br>120 pA: CON vs cKD, $P = 0.001$<br>150 pA: CON vs cKD, $P = 0.002$                  | 0 pA:<br>CON $0.654 \pm 0.277$<br>cKD $0.000 \pm 0.000$<br>30 pA:<br>CON $2.462 \pm 0.633$<br>cKD $0.682 \pm 0.363$<br>60 pA:<br>CON $4.885 \pm 0.860$<br>cKD $1.909 \pm 0.714$<br>90 pA:<br>CON $7.423 \pm 0.933$<br>cKD $3.500 \pm 0.930$<br>120 pA:<br>CON $9.808 \pm 0.925$<br>cKD $5.591 \pm 1.023$<br>150 pA:<br>CON $11.115 \pm 0.982$<br>cKD $7.091 \pm 0.835$ |
| 7m: AP threshold<br>CON ( <i>n</i> = 26)<br>cKD ( <i>n</i> = 22)                                                                                                  | Unpaired t test<br>$t = 3.110, P = 0.003$                                                                                                                                     |                                                                                                                                                                                                                                                          | CON $-45.126 \pm 0.717$<br>cKD $-42.201 \pm 0.572$                                                                                                                                                                                                                                                                                                                     |
| 8b: cOE-SIT<br>CON + AAV-mCherry ( <i>n</i> = 11)<br>CON + AAV-NRBF2 ( <i>n</i> = 11)<br>CSDS + AAV-mCherry ( <i>n</i> = 13)<br>CSDS + AAV-NRBF2 ( <i>n</i> = 12) | Two-way ANOVA<br>Stress: $F(1, 43) = 19.340, P < 0.001$<br>AAV-NRBF2: $F(1, 43) = 80.630, P < 0.001$<br>Stress $\times$ AAV-NRBF2: $F(1, 43) = 18.320, P < 0.001$             | Bonferroni's post hoc test<br>CON + AAV-mCherry vs CSDS + AAV-mCherry, $P < 0.001$ ;<br>CON + AAV-NRBF2 vs CSDS + AAV-NRBF2, $P = 0.004$ ;<br>CON + AAV-mCherry vs CON + AAV-NRBF2, $P > 0.999$ ;<br>CSDS + AAV-mCherry vs CSDS + AAV-NRBF2, $P < 0.001$ | CON + AAV-mCherry $1.143 \pm 0.074$<br>CON + AAV-NRBF2 $1.151 \pm 0.060$<br>CSDS + AAV-mCherry $0.200 \pm 0.056$<br>CSDS + AAV-NRBF2 $0.817 \pm 0.089$                                                                                                                                                                                                                 |

|                                                                                                                                                                                                  |                                                                                                                                                                                                                                 |                                                                                                                                                                                                                                                                                                                                |                                                                                                                                                                                                                                                |
|--------------------------------------------------------------------------------------------------------------------------------------------------------------------------------------------------|---------------------------------------------------------------------------------------------------------------------------------------------------------------------------------------------------------------------------------|--------------------------------------------------------------------------------------------------------------------------------------------------------------------------------------------------------------------------------------------------------------------------------------------------------------------------------|------------------------------------------------------------------------------------------------------------------------------------------------------------------------------------------------------------------------------------------------|
| <p>cOE-TST</p> <p>CON + AAV-mCherry<br/>(<i>n</i> = 12)</p> <p>CON + AAV-NRBF2<br/>(<i>n</i> = 12)</p> <p>CSDS + AAV-mCherry<br/>(<i>n</i> = 13)</p> <p>CSDS + AAV-NRBF2<br/>(<i>n</i> = 13)</p> | <p>Two-way ANOVA</p> <p>Stress: <math>F(1, 46) = 13.130, P = 0.001</math></p> <p>AAV-NRBF2: <math>F(1, 46) = 11.680, P = 0.001</math></p> <p>Stress <math>\times</math> AAV-NRBF2: <math>F(1, 46) = 2.530, P = 0.119</math></p> | <p>Bonferroni's post hoc test</p> <p>CON + AAV-mCherry vs CSDS + AAV-mCherry, <math>P = 0.002</math>;</p> <p>CON + AAV-NRBF2 vs CSDS + AAV-NRBF2, <math>P = 0.406</math>;</p> <p>CON + AAV-mCherry vs CON + AAV-NRBF2, <math>P = 0.331</math>;</p> <p>CSDS + AAV-mCherry vs CSDS + AAV-NRBF2, <math>P = 0.001</math></p>       | <p>CON + AAV-mCherry<br/><math>103.526 \pm 11.920</math></p> <p>CON + AAV-NRBF2<br/><math>80.170 \pm 14.517</math></p> <p>CSDS + RV-mCherry<br/><math>161.060 \pm 8.434</math></p> <p>CSDS + AAV-NRBF2<br/><math>101.159 \pm 10.771</math></p> |
| <p>cOE-FST</p> <p>CON + AAV-mCherry<br/>(<i>n</i> = 12)</p> <p>CON + AAV-NRBF2<br/>(<i>n</i> = 12)</p> <p>CSDS + AAV-mCherry<br/>(<i>n</i> = 12)</p> <p>CSDS + AAV-NRBF2<br/>(<i>n</i> = 12)</p> | <p>Two-way ANOVA</p> <p>Stress: <math>F(1, 44) = 13.330, P = 0.001</math></p> <p>AAV-NRBF2: <math>F(1, 44) = 13.080, P = 0.001</math></p> <p>Stress <math>\times</math> AAV-NRBF2: <math>F(1, 46) = 4.659, P = 0.036</math></p> | <p>Bonferroni's post hoc test</p> <p>CON + AAV-mCherry vs CSDS + AAV-mCherry, <math>P &lt; 0.001</math>;</p> <p>CON + AAV-NRBF2 vs CSDS + AAV-NRBF2, <math>P = 0.616</math>;</p> <p>CON + AAV-mCherry vs CON + AAV-NRBF2, <math>P = 0.594</math>;</p> <p>CSDS + AAV-mCherry vs CSDS + AAV-NRBF2, <math>P &lt; 0.001</math></p> | <p>CON + AAV-mCherry<br/><math>64.657 \pm 13.441</math></p> <p>CON + AAV-NRBF2<br/><math>45.852 \pm 11.272</math></p> <p>CSDS + AAV-mCherry<br/><math>135.372 \pm 14.175</math></p> <p>CSDS + AAV-NRBF2<br/><math>62.230 \pm 11.212</math></p> |
| <p>8d: BrdU<sup>+</sup>Sox2<sup>+</sup>GFAP<sup>+</sup><br/>RGLs of CSDS-exposed<br/>Nestin-CreER<sup>T2</sup> mice</p> <p>CON + AAV-mCherry<br/>(<i>n</i> = 4)</p> <p>CON + AAV-NRBF2</p>       | <p>Two-way ANOVA</p> <p>Stress: <math>F(1, 12) = 2.633, P = 0.131</math></p> <p>AAV-NRBF2: <math>F(1, 12) = 22.940, P &lt; 0.001</math></p>                                                                                     | <p>Bonferroni's post hoc test</p> <p>CON + AAV-mCherry vs CSDS + AAV-mCherry, <math>P = 0.001</math>;</p>                                                                                                                                                                                                                      | <p>CON + AAV-mCherry<br/><math>1327.5 \pm 61.695</math></p> <p>CON + AAV-NRBF2<br/><math>1290.0 \pm 147.097</math></p>                                                                                                                         |

|                                                                                                                                                                                                                                                                                 |                                                                                                                                                                                                      |                                                                                                                                                                                                                                                                                                                       |                                                                                                                                                                                         |
|---------------------------------------------------------------------------------------------------------------------------------------------------------------------------------------------------------------------------------------------------------------------------------|------------------------------------------------------------------------------------------------------------------------------------------------------------------------------------------------------|-----------------------------------------------------------------------------------------------------------------------------------------------------------------------------------------------------------------------------------------------------------------------------------------------------------------------|-----------------------------------------------------------------------------------------------------------------------------------------------------------------------------------------|
| <p>(<i>n</i> = 4)<br/>CSDS + AAV-mCherry</p> <p>(<i>n</i> = 4)<br/>CSDS + AAV-NRBF2</p> <p>(<i>n</i> = 4)</p>                                                                                                                                                                   | <p>Stress × AAV-NRBF2:<br/>F (1, 12) = 4.075,<br/><i>P</i> = 0.067</p>                                                                                                                               | <p>CON + AAV-NRBF2 vs CSDS + AAV-NRBF2,<br/><i>P</i> = 0.148;</p> <p>CON + AAV-mCherry vs CON + AAV-NRBF2,<br/><i>P</i> &gt; 0.999;</p> <p>CSDS + AAV-mCherry vs CSDS + AAV-NRBF2,<br/><i>P</i> = 0.049</p>                                                                                                           | <p>CSDS + AAV-mCherry<br/>682.5 ± 49.181</p> <p>CSDS + AAV-NRBF2<br/>1027.5 ± 89.687</p>                                                                                                |
| <p>BrdU<sup>+</sup>DCX<sup>+</sup> neuroblasts of CSDS-exposed Nestin-CreER<sup>T2</sup> mice</p> <p>CON + AAV-mCherry<br/>(<i>n</i> = 4)</p> <p>CON + AAV-NRBF2<br/>(<i>n</i> = 4)</p> <p>CSDS + AAV-mCherry<br/>(<i>n</i> = 4)</p> <p>CSDS + AAV-NRBF2<br/>(<i>n</i> = 4)</p> | <p>Two-way ANOVA<br/>Stress: F (1, 12) = 4.796, <i>P</i> = 0.049<br/>AAV-NRBF2: F (1, 12) = 32.910, <i>P</i> &lt; 0.001<br/>Stress × AAV-NRBF2: F (1, 12) = 3.657, <i>P</i> = 0.080</p>              | <p>Bonferroni's post hoc test</p> <p>CON + AAV-mCherry vs CSDS + AAV-mCherry,<br/><i>P</i> &lt; 0.001;</p> <p>CON + AAV-NRBF2 vs CSDS + AAV-NRBF2,<br/><i>P</i> = 0.038</p> <p>CON + AAV-mCherry vs CON + AAV-NRBF2,<br/><i>P</i> &gt; 0.999;</p> <p>CSDS + AAV-mCherry vs CSDS + AAV-NRBF2,<br/><i>P</i> = 0.027</p> | <p>CON + AAV-mCherry<br/>1481.25 ± 133.094</p> <p>CON + AAV-NRBF2<br/>1515.00 ± 126.541</p> <p>CSDS + AAV-mCherry<br/>551.25 ± 58.216</p> <p>CSDS + AAV-NRBF2<br/>1050.00 ± 148.366</p> |
| <p>BrdU<sup>+</sup>NeuN<sup>+</sup> neurons of CSDS-exposed Nestin-CreER<sup>T2</sup> mice</p> <p>CON + AAV-mCherry<br/>(<i>n</i> = 5)</p> <p>CON + AAV-NRBF2<br/>(<i>n</i> = 5)</p> <p>CSDS + AAV-mCherry<br/>(<i>n</i> = 5)</p> <p>CSDS + AAV-NRBF2</p>                       | <p>Two-way ANOVA<br/>Stress:<br/>F (1, 15) = 6.116,<br/><i>P</i> = 0.026<br/>AAV-NRBF2: F (1, 15) = 11.860, <i>P</i> = 0.004<br/>Stress × AAV-NRBF2:<br/>F (1, 15) = 5.464,<br/><i>P</i> = 0.034</p> | <p>Bonferroni's post hoc test</p> <p>CON + AAV-mCherry vs CSDS + AAV-mCherry,<br/><i>P</i> = 0.002;</p> <p>CON + AAV-NRBF2 vs CSDS + AAV-NRBF2,<br/><i>P</i> = 0.918;</p> <p>CON + AAV-</p>                                                                                                                           | <p>CON + AAV-mCherry<br/>942.00 ± 68.476</p> <p>CON + AAV-NRBF2<br/>951.00 ± 51.439</p> <p>CSDS + AAV-mCherry<br/>558.00 ± 56.405</p> <p>CSDS + AAV-NRBF2<br/>877.50 ± 91.754</p>       |

|                                                        |                                           |                                                                                                        |                                                 |
|--------------------------------------------------------|-------------------------------------------|--------------------------------------------------------------------------------------------------------|-------------------------------------------------|
| (n = 4)                                                |                                           | mCherry vs CON + AAV-NRBF2,<br>$P > 0.999$ ;<br>CSDS + AAV-mCherry vs CSDS + AAV-NRBF2,<br>$P = 0.010$ |                                                 |
| 8h. Relative mRNA level in the DG of CSDS-exposed mice |                                           |                                                                                                        |                                                 |
| <i>Hbb-b1</i><br>CON (n = 6)<br>CSDS (n = 8)           | Unpaired t test<br>$t = 3.810, P = 0.003$ |                                                                                                        | CON $1.013 \pm 0.070$<br>CSDS $3.086 \pm 0.464$ |
| <i>Nnt</i><br>CON (n = 5)<br>CSDS (n = 8)              | Unpaired t test<br>$t = 3.237, P = 0.008$ |                                                                                                        | CON $0.905 \pm 0.124$<br>CSDS $1.273 \pm 0.048$ |
| <i>Pou4f3</i><br>CON (n = 6)<br>CSDS (n = 6)           | Unpaired t test<br>$t = 2.335, P = 0.042$ |                                                                                                        | CON $1.083 \pm 0.169$<br>CSDS $2.148 \pm 0.424$ |
| <i>Apoa1</i><br>CON (n = 6)<br>CSDS (n = 6)            | Unpaired t test<br>$t = 2.904, P = 0.016$ |                                                                                                        | CON $1.008 \pm 0.054$<br>CSDS $1.832 \pm 0.278$ |
| <i>Mfge8</i><br>CON (n = 6)<br>CSDS (n = 7)            | Unpaired t test<br>$t = 3.369, P = 0.006$ |                                                                                                        | CON $1.006 \pm 0.047$<br>CSDS $0.813 \pm 0.034$ |
| <i>Fabp7</i><br>CON (n = 6)<br>CSDS (n = 7)            | Unpaired t test<br>$t = 3.865, P = 0.003$ |                                                                                                        | CON $1.012 \pm 0.073$<br>CSDS $0.536 \pm 0.095$ |
| <i>Farp2</i><br>CON (n = 6)<br>CSDS (n = 7)            | Unpaired t test<br>$t = 3.621, P = 0.004$ |                                                                                                        | CON $1.005 \pm 0.043$<br>CSDS $0.767 \pm 0.048$ |
| <i>P3h1</i><br>CON (n = 6)<br>CSDS (n = 8)             | Unpaired t test<br>$t = 2.282, P = 0.042$ |                                                                                                        | CON $1.014 \pm 0.080$<br>CSDS $0.807 \pm 0.051$ |
| 8i: <i>Mfge8</i> mRNA level in DG of CSDS-exposed      | Two-way ANOVA<br>Stress: $F(1, 20) =$     | Bonferroni's post hoc test                                                                             | CON + AAV-mCherry<br>$1.007 \pm 0.053$          |

|                                                                                                                                                                                                                                             |                                                                                                                                                                                                       |                                                                                                                                                                                                                                                                                                     |                                                                                                                                                                           |
|---------------------------------------------------------------------------------------------------------------------------------------------------------------------------------------------------------------------------------------------|-------------------------------------------------------------------------------------------------------------------------------------------------------------------------------------------------------|-----------------------------------------------------------------------------------------------------------------------------------------------------------------------------------------------------------------------------------------------------------------------------------------------------|---------------------------------------------------------------------------------------------------------------------------------------------------------------------------|
| <p>mice</p> <p>CON + AAV-mCherry<br/>(<i>n</i> = 6)</p> <p>CON + AAV-NRBF2<br/>(<i>n</i> = 6)</p> <p>CSDS + AAV-mCherry<br/>(<i>n</i> = 6)</p> <p>CSDS + AAV-NRBF2<br/>(<i>n</i> = 6)</p>                                                   | <p>52.090, <i>P</i> &lt; 0.001</p> <p>AAV-NRBF2: F (1, 20) = 2.427, <i>P</i> = 0.135</p> <p>Stress × AAV-NRBF2: F (1, 20) = 19.980, <i>P</i> &lt; 0.001</p>                                           | <p>CON + AAV-mCherry vs CSDS + AAV-mCherry, <i>P</i> = 0.001;</p> <p>CON + AAV-NRBF2 vs CSDS + AAV-NRBF2, <i>P</i> = 0.105;</p> <p>CON + AAV-mCherry vs CON + AAV-NRBF2, <i>P</i> = 0.133;</p> <p>CSDS + AAV-mCherry vs CSDS + AAV-NRBF2, <i>P</i> &lt; 0.001</p>                                   | <p>CON + AAV-NRBF2<br/>1.157 ± 0.047</p> <p>CSDS + AAV-mCherry<br/>0.676 ± 0.032</p> <p>CSDS + AAV-NRBF2<br/>1.317 ± 0.077</p>                                            |
| <p>8j: <i>Fabp7</i> mRNA level in DG of CSDS-exposed mice</p> <p>CON + AAV-mCherry<br/>(<i>n</i> = 5)</p> <p>CON + AAV-NRBF2<br/>(<i>n</i> = 5)</p> <p>CSDS + AAV-mCherry<br/>(<i>n</i> = 6)</p> <p>CSDS + AAV-NRBF2<br/>(<i>n</i> = 6)</p> | <p>Two-way ANOVA</p> <p>Stress: F (1, 18) = 33.070, <i>P</i> &lt; 0.001</p> <p>Virus: F (1, 18) = 1.441, <i>P</i> = 0.246</p> <p>Stress × virus: F (1, 18) = 8.044, <i>P</i> = 0.011</p>              | <p>Bonferroni's post hoc test</p> <p>CON + AAV-mCherry vs CSDS + AAV-mCherry, <i>P</i> = 0.021;</p> <p>CON + AAV-NRBF2 vs CSDS + AAV-NRBF2, <i>P</i> = 0.525;</p> <p>CON + AAV-mCherry vs CON + AAV-NRBF2, <i>P</i> = 0.128;</p> <p>CSDS + AAV-mCherry vs CSDS + AAV-NRBF2, <i>P</i> &lt; 0.001</p> | <p>CON + AAV-mCherry<br/>1.042 ± 0.036</p> <p>CON + AAV-NRBF2<br/>1.217 ± 0.056</p> <p>CSDS + AAV-mCherry<br/>0.798 ± 0.046</p> <p>CSDS + AAV-NRBF2<br/>1.316 ± 0.082</p> |
| <p>8k: <i>Hbb-b1</i> mRNA level in DG of CSDS-exposed mice</p> <p>CON + AAV-mCherry<br/>(<i>n</i> = 6)</p> <p>CON + AAV-NRBF2<br/>(<i>n</i> = 6)</p> <p>CSDS + AAV-mCherry<br/>(<i>n</i> = 6)</p>                                           | <p>Two-way ANOVA</p> <p>Stress: F (1, 20) = 84.790, <i>P</i> &lt; 0.001</p> <p>AAV-NRBF2: F (1, 20) = 12.140, <i>P</i> = 0.002</p> <p>Stress × AAV-NRBF2: F (1, 20) = 28.930, <i>P</i> &lt; 0.001</p> | <p>Bonferroni's post hoc test</p> <p>CON + AAV-mCherry vs CSDS + AAV-mCherry, <i>P</i> &lt; 0.001;</p> <p>CON + AAV-NRBF2 vs CSDS + AAV-NRBF2, <i>P</i> &lt; 0.001</p>                                                                                                                              | <p>CON + AAV-mCherry<br/>1.005 ± 0.047</p> <p>CON + AAV-NRBF2<br/>0.814 ± 0.031</p> <p>CSDS + AAV-mCherry<br/>1.448 ± 0.075</p> <p>CSDS + AAV-NRBF2<br/>0.720 ± 0.034</p> |

|                                                                                                                                                                                                                          |                                                                                                                                                                                                              |                                                                                                                                                                                                                                                                                                                      |                                                                                                                                                    |
|--------------------------------------------------------------------------------------------------------------------------------------------------------------------------------------------------------------------------|--------------------------------------------------------------------------------------------------------------------------------------------------------------------------------------------------------------|----------------------------------------------------------------------------------------------------------------------------------------------------------------------------------------------------------------------------------------------------------------------------------------------------------------------|----------------------------------------------------------------------------------------------------------------------------------------------------|
| CSDS + AAV-NRBF2<br>( <i>n</i> = 6)                                                                                                                                                                                      |                                                                                                                                                                                                              | <i>P</i> = 0.391;<br>CON + AAV-<br>mCherry vs CON +<br>AAV-NRBF2,<br><i>P</i> = 0.027;<br>CSDS + AAV-<br>mCherry vs CSDS<br>+ AAV-NRBF2,<br><i>P</i> < 0.001                                                                                                                                                         |                                                                                                                                                    |
| 8l: <i>Nnt</i> mRNA level in<br>DG of CSDS-exposed<br>mice<br>CON + AAV-mCherry<br>( <i>n</i> = 6)<br>CSDS + AAV-mCherry<br>( <i>n</i> = 5)<br>CON + AAV-NRBF2<br>( <i>n</i> = 6)<br>CSDS + AAV-NRBF2<br>( <i>n</i> = 6) | Two-way ANOVA<br>Stress: <i>F</i> (1, 19) =<br>25.980, <i>P</i> < 0.001<br>AAV-NRBF2: <i>F</i> (1, 19)<br>= 17.300, <i>P</i> = 0.001<br>Stress × AAV-NRBF2:<br><i>F</i> (1, 19) = 5.051,<br><i>P</i> = 0.037 | Bonferroni's post<br>hoc test<br>CON + AAV-<br>mCherry vs CSDS<br>+ AAV-mCherry,<br><i>P</i> = 0.001;<br>CON + AAV-<br>NRBF2 vs CSDS +<br>AAV-NRBF2,<br><i>P</i> = 0.364;<br>CON + AAV-<br>mCherry vs CON +<br>AAV-NRBF2,<br><i>P</i> = 0.106;<br>CSDS + AAV-<br>mCherry vs CSDS<br>+ AAV-NRBF2,<br><i>P</i> < 0.001 | CON + AAV-mCherry<br>1.014 ± 0.072<br>CON + AAV-NRBF2<br>0.888 ± 0.024<br>CSDS + AAV-mCherry<br>1.297 ± 0.023<br>CSDS + AAV-NRBF2<br>0.973 ± 0.031 |
| S1b: CSDS-social<br>interaction time<br>CON ( <i>n</i> = 12)<br>CSDS ( <i>n</i> = 12)                                                                                                                                    | Two-way ANOVA<br>Stress: <i>F</i> (1, 44) =<br>21.950, <i>P</i> < 0.001                                                                                                                                      | Bonferroni's post<br>hoc test<br>Target:<br>CON vs CSDS, <i>P</i> <<br>0.001                                                                                                                                                                                                                                         | No target:<br>CON 52.658 ± 4.705<br>CSDS 51.783 ± 6.150<br>Target:<br>CON 71.075 ± 3.474<br>CSDS 26.158 ± 4.849                                    |
| S1c: CSDS-SIT<br>CON ( <i>n</i> = 11)<br>CSDS ( <i>n</i> = 12)                                                                                                                                                           | Unpaired <i>t</i> test<br><i>t</i> = 8.607, <i>P</i> < 0.001                                                                                                                                                 |                                                                                                                                                                                                                                                                                                                      | CON 1.258 ± 0.065<br>CSDS 0.492 ± 0.061                                                                                                            |
| S1d: CSDS-SPT<br>CON ( <i>n</i> = 12)<br>CSDS ( <i>n</i> = 12)                                                                                                                                                           | Unpaired <i>t</i> test<br><i>t</i> = 8.726, <i>P</i> < 0.001                                                                                                                                                 |                                                                                                                                                                                                                                                                                                                      | CON 87.131 ± 1.214<br>CSDS 66.962 ± 1.967                                                                                                          |
| S1e: CSDS-TST<br>CON ( <i>n</i> = 11)<br>CSDS ( <i>n</i> = 11)                                                                                                                                                           | Unpaired <i>t</i> test<br><i>t</i> = 3.597, <i>P</i> = 0.002                                                                                                                                                 |                                                                                                                                                                                                                                                                                                                      | CON 88.378 ± 9.392<br>CSDS 142.492 ±<br>11.755                                                                                                     |

|                                                                                               |                                                       |  |                                                                                                                                                                                                                                                |
|-----------------------------------------------------------------------------------------------|-------------------------------------------------------|--|------------------------------------------------------------------------------------------------------------------------------------------------------------------------------------------------------------------------------------------------|
| S1f: CSDS-FST<br>CON ( <i>n</i> = 11)<br>CSDS ( <i>n</i> = 11)                                | Unpaired t test<br><i>t</i> = 3.900, <i>P</i> = 0.001 |  | CON 52.640 ± 9.075<br>CSDS 125.800 ± 16.410                                                                                                                                                                                                    |
| S1g: <i>Nrbf2</i> mRNA level in the brain<br>( <i>n</i> = 4)                                  |                                                       |  | mPFC 1.401 ± 0.185<br>ACC 1.226 ± 0.046<br>CPu 1.136 ± 0.044<br>NAc 1.026 ± 0.115<br>Amygdala 1.210 ± 0.072<br>DG 2.338 ± 0.061<br>CA1 1.757 ± 0.060<br>CA3 1.609 ± 0.118<br>VTA 1.098 ± 0.063<br>Cerebellum 1.003 ± 0.045<br>OB 1.045 ± 0.059 |
| 1h: <i>p62</i> mRNA level in DG in CSDS model<br>CON ( <i>n</i> = 6)<br>CSDS ( <i>n</i> = 6)  | Unpaired t test<br><i>t</i> = 2.765, <i>P</i> = 0.020 |  | CON 1.025 ± 0.100<br>CSDS 0.731 ± 0.035                                                                                                                                                                                                        |
| 1j: <i>p62</i> intensity in DG in CSDS model<br>CON ( <i>n</i> = 12)<br>CSDS ( <i>n</i> = 12) | Unpaired t test<br><i>t</i> = 3.274, <i>P</i> = 0.004 |  | CON 1.000 ± 0.071<br>CSDS 0.732 ± 0.040                                                                                                                                                                                                        |
| S1l: VPS34 expression<br>CON ( <i>n</i> = 6)<br>CSDS ( <i>n</i> = 11)                         | Unpaired t test<br><i>t</i> = 0.521, <i>P</i> = 0.610 |  | CON 1.000 ± 0.105<br>CSDS 1.069 ± 0.079                                                                                                                                                                                                        |
| S1m: Beclin1 expression<br>CON ( <i>n</i> = 6)<br>CSDS ( <i>n</i> = 11)                       | Unpaired t test<br><i>t</i> = 0.063, <i>P</i> = 0.951 |  | CON 1.000 ± 0.067<br>CSDS 0.995 ± 0.039                                                                                                                                                                                                        |
| S1n: ATG14L expression<br>CON ( <i>n</i> = 6)<br>CSDS ( <i>n</i> = 11)                        | Unpaired t test<br><i>t</i> = 0.543, <i>P</i> = 0.595 |  | CON 1.000 ± 0.080<br>CSDS 0.959 ± 0.037                                                                                                                                                                                                        |
| S1o: CUS-SPT<br>CON ( <i>n</i> = 11)<br>CUS ( <i>n</i> = 11)                                  | Unpaired t test<br><i>t</i> = 4.009, <i>P</i> = 0.001 |  | CON 82.984 ± 2.129<br>CUS 68.701 ± 2.857                                                                                                                                                                                                       |
| S1p: CUS-TST<br>CON ( <i>n</i> = 11)<br>CUS ( <i>n</i> = 11)                                  | Unpaired t test<br><i>t</i> = 4.812, <i>P</i> < 0.001 |  | CON 99.167 ± 11.126<br>CUS 169.569 ± 9.498                                                                                                                                                                                                     |
| S1q: CUS-FST<br>CON ( <i>n</i> = 11)<br>CUS ( <i>n</i> = 11)                                  | Unpaired t test<br><i>t</i> = 7.143, <i>P</i> < 0.001 |  | CON 61.667 ± 11.525<br>CUS 173.271 ± 10.549                                                                                                                                                                                                    |

|                                                                                                                                                                                                                    |                                                                                                                                                           |                                                                                                                                                                |                                                                                                                                                              |
|--------------------------------------------------------------------------------------------------------------------------------------------------------------------------------------------------------------------|-----------------------------------------------------------------------------------------------------------------------------------------------------------|----------------------------------------------------------------------------------------------------------------------------------------------------------------|--------------------------------------------------------------------------------------------------------------------------------------------------------------|
| S1r: CORT-SPT<br>CON ( <i>n</i> = 9)<br>CORT ( <i>n</i> = 11)                                                                                                                                                      | Unpaired t test<br>$t = 7.142, P < 0.001$                                                                                                                 |                                                                                                                                                                | CON $84.613 \pm 2.227$<br>CORT $50.687 \pm 3.877$                                                                                                            |
| S1s: CORT-TST<br>CON ( <i>n</i> = 9)<br>CORT ( <i>n</i> = 11)                                                                                                                                                      | Unpaired t test<br>$t = 7.022, P < 0.001$                                                                                                                 |                                                                                                                                                                | CON $84.233 \pm 6.947$<br>CORT $188.642 \pm 12.145$                                                                                                          |
| S1t: CORT-FST<br>CON ( <i>n</i> = 9)<br>CORT ( <i>n</i> = 11)                                                                                                                                                      | Unpaired t test<br>$t = 8.921, P < 0.001$                                                                                                                 |                                                                                                                                                                | CON $53.811 \pm 8.842$<br>CORT $169.851 \pm 9.266$                                                                                                           |
| S3b: BrdU <sup>+</sup> Sox2 <sup>+</sup> GFAP <sup>+</sup><br>RGLs<br>CON ( <i>n</i> = 5)<br>CSDS ( <i>n</i> = 5)                                                                                                  | Unpaired t test<br>$t = 5.837, P = 0.001$                                                                                                                 |                                                                                                                                                                | CON $1320.0 \pm 82.432$<br>CSDS $717.0 \pm 62.282$                                                                                                           |
| S3d: BrdU <sup>+</sup> DCX <sup>+</sup><br>neuroblasts<br>CON ( <i>n</i> = 5)<br>CSDS ( <i>n</i> = 5)                                                                                                              | Unpaired t test<br>$t = 6.113, P = 0.001$                                                                                                                 |                                                                                                                                                                | CON $1418.0 \pm 87.943$<br>CSDS $734.0 \pm 69.181$                                                                                                           |
| S3f: Dendritic length of<br>newborn neurons<br>CON ( <i>n</i> = 42)<br>CSDS ( <i>n</i> = 38)                                                                                                                       | Unpaired t test<br>$t = 7.228, P < 0.001$                                                                                                                 |                                                                                                                                                                | CON $982.5 \pm 31.151$<br>CSDS $662.2 \pm 31.378$                                                                                                            |
| S3f: Number of crossings<br>CON ( <i>n</i> = 42)<br>CSDS ( <i>n</i> = 38)                                                                                                                                          | Repeated measures<br>ANOVA<br>Stress: $F(1, 78) = 43.980, P < 0.001$                                                                                      |                                                                                                                                                                |                                                                                                                                                              |
| S4h: Spine density of<br>newborn neurons<br>CON ( <i>n</i> = 50)<br>CSDS ( <i>n</i> = 50)                                                                                                                          | Unpaired t test<br>$t = 10.090, P < 0.001$                                                                                                                |                                                                                                                                                                | CON $21.121 \pm 0.947$<br>CSDS $10.505 \pm 0.459$                                                                                                            |
| S4b. NRBF2 protein<br>expression after virus<br>injection<br>CON + LV-vector<br>( <i>n</i> = 8)<br>CON + LV-NRBF2<br>( <i>n</i> = 8)<br>CSDS + LV-vector<br>( <i>n</i> = 11)<br>CSDS + LV-NRBF2<br>( <i>n</i> = 9) | Two-way ANOVA<br>Stress: $F(1, 32) = 109.800, P < 0.001$<br>Virus: $F(1, 32) = 5.581, P = 0.024$<br>Stress $\times$ Virus: $F(1, 32) = 15.510, P < 0.001$ | Bonferroni's post<br>hoc test<br>CON + AAV-<br>mCherry vs CON +<br>AAV-NRBF2,<br>$P < 0.001$ ;<br>CSDS + AAV-<br>VECTOR vs CSDS<br>+ AAV-NRBF2,<br>$P < 0.001$ | CON + LV-vector<br>$1.000 \pm 0.050$<br>CON + LV-NRBF2<br>$2.528 \pm 0.321$<br>CSDS + LV-vector<br>$0.632 \pm 0.072$<br>CSDS + LV-NRBF2<br>$4.001 \pm 0.354$ |
| S4c. LC3-II protein<br>expression after virus<br>injection                                                                                                                                                         | Two-way ANOVA<br>Stress: $F(1, 33) = 12.710, P = 0.001$                                                                                                   | Bonferroni's post<br>hoc test<br>CON + LV-vector                                                                                                               | CON + LV-vector<br>$1.000 \pm 0.056$<br>CON + LV-NRBF2                                                                                                       |



|                                                                                                                                                                                                                                                                                                                                                                                                                       |                                                                                                                                                                                                                                                                            |                                                                                                                                                                                                                                                                                                                              |                                                                                                                                                                                                                                                                                                                                                                                                                                                                                                                 |
|-----------------------------------------------------------------------------------------------------------------------------------------------------------------------------------------------------------------------------------------------------------------------------------------------------------------------------------------------------------------------------------------------------------------------|----------------------------------------------------------------------------------------------------------------------------------------------------------------------------------------------------------------------------------------------------------------------------|------------------------------------------------------------------------------------------------------------------------------------------------------------------------------------------------------------------------------------------------------------------------------------------------------------------------------|-----------------------------------------------------------------------------------------------------------------------------------------------------------------------------------------------------------------------------------------------------------------------------------------------------------------------------------------------------------------------------------------------------------------------------------------------------------------------------------------------------------------|
| <p>CON + LV-vector<br/>(<i>n</i> = 9)</p> <p>CON + LV-NRBF2<br/>(<i>n</i> = 9)</p> <p>CSDS + LV-vector<br/>(<i>n</i> = 10)</p> <p>CSDS + LV-NRBF2<br/>(<i>n</i> = 9)</p>                                                                                                                                                                                                                                              | <p>Virus: <math>F(1, 33) = 6.777</math>,<br/><math>P = 0.014</math></p> <p>Stress <math>\times</math> Virus: <math>F(1, 33) = 11.300</math>,<br/><math>P = 0.002</math></p>                                                                                                | <p>vs CSDS + LV-vector,<br/><math>P &lt; 0.001</math>;</p> <p>CON + LV-NRBF2 vs CSDS + LV-NRBF2,<br/><math>P &gt; 0.999</math>;</p> <p>CON + LV-vector vs CON + LV-NRBF2,<br/><math>P = 0.999</math>;</p> <p>CSDS + LV-vector vs CSDS + LV-NRBF2,<br/><math>P &lt; 0.001</math></p>                                          | <p><math>1.010 \pm 0.065</math></p> <p>CSDS + LV-vector<br/><math>0.691 \pm 0.039</math></p> <p>CSDS + LV-NRBF2<br/><math>1.050 \pm 0.046</math></p>                                                                                                                                                                                                                                                                                                                                                            |
| <p>S4d. p62 protein expression after virus injection</p> <p>CON + LV-vector<br/>(<i>n</i> = 9)</p> <p>CON + LV-NRBF2<br/>(<i>n</i> = 9)</p> <p>CSDS + LV-vector<br/>(<i>n</i> = 10)</p> <p>CSDS + LV-NRBF2<br/>(<i>n</i> = 8)</p>                                                                                                                                                                                     | <p>Two-way ANOVA</p> <p>Stress: <math>F(1, 32) = 11.730</math>,<br/><math>P = 0.002</math></p> <p>Virus: <math>F(1, 32) = 12.610</math>,<br/><math>P = 0.001</math></p> <p>Stress <math>\times</math> Virus: <math>F(1, 32) = 0.001</math>,<br/><math>P = 0.980</math></p> | <p>Bonferroni's post hoc test</p> <p>CON + LV-vector vs CSDS + LV-vector,<br/><math>P = 0.028</math>;</p> <p>CON + LV-NRBF2 vs CSDS + LV-NRBF2,<br/><math>P = 0.042</math>;</p> <p>CON + LV-vector vs CON + LV-NRBF2,<br/><math>P = 0.040</math>;</p> <p>CSDS + LV-vector vs CSDS + LV-NRBF2,<br/><math>P = 0.045</math></p> | <p>CON + LV-vector<br/><math>1.000 \pm 0.052</math></p> <p>CON + LV-NRBF2<br/><math>0.790 \pm 0.098</math></p> <p>CSDS + LV-vector<br/><math>0.782 \pm 0.027</math></p> <p>CSDS + LV-NRBF2<br/><math>0.576 \pm 0.044</math></p>                                                                                                                                                                                                                                                                                 |
| <p>S5b: TMZ-SIT</p> <p>CON + LV-vector + VEH<br/>(<i>n</i> = 9)</p> <p>CON + LV-vector + TMZ<br/>(<i>n</i> = 9)</p> <p>CON + LV-NRBF2 + VEH<br/>(<i>n</i> = 8)</p> <p>CON + LV-NRBF2 + TMZ<br/>(<i>n</i> = 10)</p> <p>CSDS + LV-vector + VEH<br/>(<i>n</i> = 9)</p> <p>CSDS + LV-vector + TMZ<br/>(<i>n</i> = 9)</p> <p>CSDS + LV-NRBF2 + VEH<br/>(<i>n</i> = 9)</p> <p>CSDS + LV-NRBF2 + TMZ<br/>(<i>n</i> = 10)</p> | <p>One-way ANOVA</p> <p><math>F(7, 65) = 7.949</math>,<br/><math>P &lt; 0.001</math></p>                                                                                                                                                                                   | <p>Tukey's post hoc test</p> <p>CON + LV-vector + VEH vs CSDS + LV-vector + VEH,<br/><math>P = 0.002</math>;</p> <p>CSDS + LV-vector + VEH vs CSDS + LV-NRBF2 + VEH,<br/><math>P = 0.011</math></p> <p>CSDS + LV-NRBF2 + TMZ vs CSDS + LV-NRBF2 + VEH,<br/><math>P = 0.035</math></p>                                        | <p>CON + LV-vector + VEH<br/><math>1.145 \pm 0.128</math></p> <p>CON + LV-vector + TMZ<br/><math>1.203 \pm 0.196</math></p> <p>CON + LV-NRBF2 + VEH<br/><math>1.277 \pm 0.211</math></p> <p>CON + LV-NRBF2 + TMZ<br/><math>0.914 \pm 0.102</math></p> <p>CSDS + LV-vector + VEH<br/><math>0.234 \pm 0.071</math></p> <p>CSDS + LV-vector + TMZ<br/><math>0.397 \pm 0.174</math></p> <p>CSDS + LV-NRBF2 + VEH<br/><math>1.017 \pm 0.199</math></p> <p>CSDS + LV-NRBF2 + TMZ<br/><math>0.341 \pm 0.076</math></p> |
| <p>S5b: TMZ-TST</p>                                                                                                                                                                                                                                                                                                                                                                                                   | <p>One-way ANOVA</p>                                                                                                                                                                                                                                                       | <p>Tukey's post hoc</p>                                                                                                                                                                                                                                                                                                      | <p>CON + LV-vector +</p>                                                                                                                                                                                                                                                                                                                                                                                                                                                                                        |

|                                                                                                                                                                                                                                                                                                                                                                                                                       |                                                                      |                                                                                                                                                                                                                                                                    |                                                                                                                                                                                                                                                                                                                                                                            |
|-----------------------------------------------------------------------------------------------------------------------------------------------------------------------------------------------------------------------------------------------------------------------------------------------------------------------------------------------------------------------------------------------------------------------|----------------------------------------------------------------------|--------------------------------------------------------------------------------------------------------------------------------------------------------------------------------------------------------------------------------------------------------------------|----------------------------------------------------------------------------------------------------------------------------------------------------------------------------------------------------------------------------------------------------------------------------------------------------------------------------------------------------------------------------|
| <p>CON + LV-vector + VEH<br/>(<i>n</i> = 9)</p> <p>CON + LV-vector + TMZ<br/>(<i>n</i> = 9)</p> <p>CON + LV-NRBF2 + VEH<br/>(<i>n</i> = 9)</p> <p>CON + LV-NRBF2 + TMZ<br/>(<i>n</i> = 10)</p> <p>CSDS + LV-vector + VEH<br/>(<i>n</i> = 9)</p> <p>CSDS + LV-vector + TMZ<br/>(<i>n</i> = 9)</p> <p>CSDS + LV-NRBF2 + VEH<br/>(<i>n</i> = 9)</p> <p>CSDS + LV-NRBF2 + TMZ<br/>(<i>n</i> = 10)</p>                     | <p>F (7, 66) = 10.110,<br/><i>P</i> &lt; 0.001</p>                   | <p>test</p> <p>CON + LV-vector+ VEH vs CSDS + LV-vector + VEH,<br/><i>P</i> = 0.004</p> <p>CSDS + LV-vector + VEH vs CSDS + LV-NRBF2 + VEH,<br/><i>P</i> = 0.004</p> <p>CSDS + LV-NRBF2 + TMZ vs CSDS + LV-NRBF2 + VEH,<br/><i>P</i> &lt; 0.001</p>                | <p>VEH 86.624 ± 9.765</p> <p>CON + LV-vector + TMZ 114.208 ± 9.246</p> <p>CON + LV-NRBF2 + VEH 99.155 ± 10.552</p> <p>CON + LV-NRBF2 + TMZ 122.171 ± 12.034</p> <p>CSDS + LV-vector + VEH 146.749 ± 5.884</p> <p>CSDS + LV-vector + TMZ 170.467 ± 13.602</p> <p>CSDS + LV-NRBF2 + VEH 86.151 ± 11.704</p> <p>CSDS + LV-NRBF2 + TMZ 165.383 ± 9.699</p>                     |
| <p>S5b: TMZ-FST</p> <p>CON + LV-vector + VEH<br/>(<i>n</i> = 9)</p> <p>CON + LV-vector + TMZ<br/>(<i>n</i> = 9)</p> <p>CON + LV-NRBF2 + VEH<br/>(<i>n</i> = 9)</p> <p>CON + LV-NRBF2 + TMZ<br/>(<i>n</i> = 10)</p> <p>CSDS + LV-vector + VEH<br/>(<i>n</i> = 9)</p> <p>CSDS + LV-vector + TMZ<br/>(<i>n</i> = 8)</p> <p>CSDS + LV-NRBF2 + VEH<br/>(<i>n</i> = 9)</p> <p>CSDS + LV-NRBF2 + TMZ<br/>(<i>n</i> = 10)</p> | <p>One-way ANOVA<br/>F (7, 65) = 10.840,<br/><i>P</i> &lt; 0.001</p> | <p>Tukey's post hoc test</p> <p>CON + LV-vector + VEH vs CSDS + LV-vector + VEH,<br/><i>P</i> = 0.001</p> <p>CSDS + LV-vector + VEH vs CSDS + LV-NRBF2 + VEH,<br/><i>P</i> = 0.005</p> <p>CSDS + LV-NRBF2 + TMZ vs CSDS + LV-NRBF2 + VEH,<br/><i>P</i> = 0.007</p> | <p>CON + LV-vector + VEH 41.333 ± 13.430</p> <p>CON + LV-vector + TMZ 89.972 ± 15.272</p> <p>CON + LV-NRBF2 + VEH 46.064 ± 12.011</p> <p>CON + LV-NRBF2 + TMZ 71.342 ± 15.044</p> <p>CSDS + LV-vector + VEH 138.239 ± 13.509</p> <p>CSDS + LV-vector + TMZ 177.154 ± 17.354</p> <p>CSDS + LV-NRBF2 + VEH 54.624 ± 15.071</p> <p>CSDS + LV-NRBF2 + TMZ 133.287 ± 16.479</p> |
| <p>S5b: TMZ-OFT</p> <p>CON + LV-vector + VEH<br/>(<i>n</i> = 9)</p> <p>CON + LV-vector + TMZ<br/>(<i>n</i> = 9)</p> <p>CON + LV-NRBF2 + VEH<br/>(<i>n</i> = 9)</p> <p>CON + LV-NRBF2 + TMZ<br/>(<i>n</i> = 10)</p> <p>CSDS + LV-vector +</p>                                                                                                                                                                          | <p>One-way ANOVA<br/>F (7, 66) = 0.698,<br/><i>P</i> = 0.674</p>     | <p>Tukey's post hoc test</p> <p>CON + LV-vector + VEH vs CSDS + LV-vector + VEH,<br/><i>P</i> &gt; 0.999</p> <p>CSDS + LV-vector + VEH vs CSDS + LV-NRBF2 + VEH,<br/><i>P</i> &gt; 0.999</p>                                                                       | <p>CON + LV-vector + VEH 24.707 ± 2.566</p> <p>CON + LV-vector + TMZ 24.642 ± 2.224</p> <p>CON + LV-NRBF2 + VEH 29.094 ± 3.654</p> <p>CON + LV-NRBF2 + TMZ 28.915 ± 1.577</p> <p>CSDS + LV-vector + VEH 25.036 ± 2.496</p>                                                                                                                                                 |

|                                                                                                                                                                                                                                                              |                                                                                          |                                                                                                                                                                                                                                                                       |                                                                                                                                                                                                                                           |
|--------------------------------------------------------------------------------------------------------------------------------------------------------------------------------------------------------------------------------------------------------------|------------------------------------------------------------------------------------------|-----------------------------------------------------------------------------------------------------------------------------------------------------------------------------------------------------------------------------------------------------------------------|-------------------------------------------------------------------------------------------------------------------------------------------------------------------------------------------------------------------------------------------|
| <p>VEH (<math>n = 9</math>)<br/> CSDS + LV-vector + TMZ (<math>n = 9</math>)<br/> CSDS + LV-NRBF2 + VEH (<math>n = 9</math>)<br/> CSDS + LV-NRBF2 + TMZ (<math>n = 10</math>)</p>                                                                            |                                                                                          | <p>CSDS + LV-NRBF2 + TMZ vs CSDS + LV-NRBF2 + VEH, <math>P &gt; 0.999</math></p>                                                                                                                                                                                      | <p>CSDS + LV-vector + TMZ <math>24.319 \pm 2.717</math><br/> CSDS + LV-NRBF2 + VEH <math>24.859 \pm 2.857</math><br/> CSDS + LV-NRBF2 + TMZ <math>23.720 \pm 2.029</math></p>                                                             |
| <p>S5d: TMZ-BrdU<sup>+</sup> cells<br/> CON + LV-vector + VEH (<math>n = 3</math>)<br/> CSDS + LV-vector + VEH (<math>n = 3</math>)<br/> CSDS + LV-NRBF2 + VEH (<math>n = 3</math>)<br/> CSDS + LV-NRBF2 + TMZ (<math>n = 3</math>)</p>                      | <p>One-way ANOVA<br/> <math>F(3, 8) = 19.420</math>,<br/> <math>P = 0.001</math></p>     | <p>Tukey's post hoc test<br/> CON + LV-vector + VEH vs CSDS + LV-vector + VEH, <math>P = 0.001</math><br/> CSDS + LV-NRBF2 + VEH vs CSDS + LV-NRBF2 + TMZ, <math>P = 0.008</math><br/> CSDS + LV-NRBF2 + TMZ vs CSDS + LV-NRBF2 + VEH, <math>P = 0.007</math></p>     | <p>CON + LV-vector + VEH <math>2255.0 \pm 152.56</math><br/> CSDS + LV-vector + VEH <math>1070.0 \pm 72.11</math><br/> CSDS + LV-NRBF2 + VEH <math>1965.0 \pm 105.36</math><br/> CSDS + LV-NRBF2 + TMZ <math>1060.0 \pm 195.64</math></p> |
| <p>S5d: TMZ-BrdU<sup>+</sup>DCX<sup>+</sup> neuroblasts<br/> CON + LV-vector + VEH (<math>n = 3</math>)<br/> CSDS + LV-vector + VEH (<math>n = 3</math>)<br/> CSDS + LV-NRBF2 + VEH (<math>n = 3</math>)<br/> CSDS + LV-NRBF2 + TMZ (<math>n = 3</math>)</p> | <p>One-way ANOVA<br/> <math>F(3, 8) = 28.090</math>,<br/> <math>P &lt; 0.001</math></p>  | <p>Tukey's post hoc test<br/> CON + LV-vector + VEH vs CSDS + LV-vector + VEH, <math>P &lt; 0.001</math><br/> CSDS + LV-vector + VEH vs CSDS + LV-NRBF2 + VEH, <math>P = 0.005</math><br/> CSDS + LV-NRBF2 + TMZ vs CSDS + LV-NRBF2 + VEH, <math>P = 0.003</math></p> | <p>CON + LV-vector + VEH <math>1300.0 \pm 72.110</math><br/> CSDS + LV-vector + VEH <math>510.0 \pm 78.100</math><br/> CSDS + LV-NRBF2 + VEH <math>1047.0 \pm 87.620</math><br/> CSDS + LV-NRBF2 + TMZ <math>456.7 \pm 72.190</math></p>  |
| <p>S5d: TMZ- BrdU<sup>+</sup>NeuN<sup>+</sup> neuron<br/> CON + LV-vector + VEH (<math>n = 3</math>)<br/> CSDS + LV-vector + VEH (<math>n = 3</math>)<br/> CSDS + LV-NRBF2 + VEH (<math>n = 3</math>)</p>                                                    | <p>One-way ANOVA<br/> <math>F(3, 8) = 136.500</math>,<br/> <math>P &lt; 0.001</math></p> | <p>Tukey's post hoc test<br/> CON + LV-vector + VEH vs CSDS + LV-vector + VEH, <math>P &lt; 0.001</math><br/> CSDS + LV-vector + VEH vs CSDS + LV-NRBF2 + VEH, <math>P &lt; 0.001</math></p>                                                                          | <p>CON + LV-vector + VEH <math>1256.7 \pm 37.118</math><br/> CSDS + LV-vector + VEH <math>426.7 \pm 33.830</math><br/> CSDS + LV-NRBF2 + VEH <math>883.3 \pm 48.419</math><br/> CSDS + LV-NRBF2 + TMZ <math>383.3 \pm 12.019</math></p>   |

|                                                                                                                 |                                           |                                                                                                  |                                                                                       |
|-----------------------------------------------------------------------------------------------------------------|-------------------------------------------|--------------------------------------------------------------------------------------------------|---------------------------------------------------------------------------------------|
| CSDS + LV-NRBF2 + TMZ ( $n = 3$ )                                                                               |                                           | LV-NRBF2 + VEH,<br>$P < 0.001$<br>CSDS + LV-NRBF2 + TMZ vs CSDS + LV-NRBF2 + VEH,<br>$P < 0.001$ |                                                                                       |
| S6a: NRBF2 <sup>-/-</sup> mice-OFT: central entries<br>WT ( $n = 10$ )<br>NRBF2 <sup>-/-</sup> ( $n = 9$ )      | Unpaired t test<br>$t = 0.444, P = 0.663$ |                                                                                                  | WT $73.400 \pm 7.820$<br>NRBF2 <sup>-/-</sup> $68.889 \pm 6.235$                      |
| S6b: NRBF2 <sup>-/-</sup> mice-OFT: central duration<br>WT ( $n = 10$ )<br>NRBF2 <sup>-/-</sup> ( $n = 9$ )     | Unpaired t test<br>$t = 0.380, P = 0.709$ |                                                                                                  | WT $105.180 \pm 14.991$<br>NRBF2 <sup>-/-</sup> $96.444 \pm 17.591$                   |
| S6c: NRBF2 <sup>-/-</sup> mice-OFT: central distance<br>WT ( $n = 10$ )<br>NRBF2 <sup>-/-</sup> ( $n = 9$ )     | Unpaired t test<br>$t = 0.286, P = 0.779$ |                                                                                                  | WT $5.412 \pm 0.451$<br>NRBF2 <sup>-/-</sup> $5.227 \pm 0.462$                        |
| S7b: Identification of aNSCs in vitro<br>aNSCs ( $n = 6$ )                                                      | Unpaired t test<br>$t = 8.157, P < 0.001$ |                                                                                                  | Nestin $98.250 \pm 0.540$<br>Sox2 $97.170 \pm 0.453$<br>NestinSox2 $96.690 \pm 0.556$ |
| S7d: NRBF2 protein expression in NRBF2-deficient aNSCs<br>LV-GFP ( $n = 6$ )<br>LV-sh <i>Nrbf2</i> ( $n = 6$ )  | Unpaired t test<br>$t = 8.157, P < 0.001$ |                                                                                                  | LV-GFP<br>$1.000 \pm 0.058$<br>LV-sh <i>Nrbf2</i><br>$0.479 \pm 0.020$                |
| S7d: LC3-II protein expression in NRBF2-deficient aNSCs<br>LV-GFP ( $n = 6$ )<br>LV-sh <i>Nrbf2</i> ( $n = 6$ ) | Unpaired t test<br>$t = 5.532, P < 0.001$ |                                                                                                  | LV-GFP<br>$1.000 \pm 0.036$<br>LV-sh <i>Nrbf2</i><br>$0.681 \pm 0.045$                |
| S7d: p62 protein expression in NRBF2-deficient aNSCs<br>LV-GFP ( $n = 6$ )<br>LV-sh <i>Nrbf2</i> ( $n = 6$ )    | Unpaired t test<br>$t = 4.917, P = 0.001$ |                                                                                                  | LV-GFP<br>$1.000 \pm 0.052$<br>LV-sh <i>Nrbf2</i><br>$0.708 \pm 0.029$                |
| S7f: neurospheres in NRBF2-deficient aNSCs<br>Number<br>LV-GFP ( $n = 4$ )<br>LV-sh <i>Nrbf2</i> ( $n = 4$ )    | Unpaired t test<br>$t = 4.392, P = 0.005$ |                                                                                                  | LV-GFP<br>$10.000 \pm 0.707$<br>LV-sh <i>Nrbf2</i><br>$6.250 \pm 0.479$               |

|                                                                                                                                                                                                                                  |                                                                                                                                                                                               |                                                                                                                                                                                                                                                                |                                                                                                                                                                                           |
|----------------------------------------------------------------------------------------------------------------------------------------------------------------------------------------------------------------------------------|-----------------------------------------------------------------------------------------------------------------------------------------------------------------------------------------------|----------------------------------------------------------------------------------------------------------------------------------------------------------------------------------------------------------------------------------------------------------------|-------------------------------------------------------------------------------------------------------------------------------------------------------------------------------------------|
| Diameter<br>LV-GFP ( <i>n</i> = 4)<br>LV-sh <i>Nrbf2</i> ( <i>n</i> = 4)                                                                                                                                                         | Unpaired t test<br>$t = 6.847, P = 0.001$                                                                                                                                                     |                                                                                                                                                                                                                                                                | LV-GFP<br>$205.684 \pm 9.796$<br>LV-sh <i>Nrbf2</i><br>$124.240 \pm 6.747$                                                                                                                |
| S7h: the percent of<br>BrdU <sup>+</sup> GFP <sup>+</sup> cell in<br>NRBF2-deficient aNSCs<br>LV-GFP ( <i>n</i> = 3)<br>LV-sh <i>Nrbf2</i> ( <i>n</i> = 3)                                                                       | Unpaired t test<br>$t = 6.327, P = 0.003$                                                                                                                                                     |                                                                                                                                                                                                                                                                | LV-GFP<br>$58.660 \pm 3.237$<br>LV-sh <i>Nrbf2</i><br>$33.805 \pm 2.225$                                                                                                                  |
| S7j: the percent of<br>Tuj1 <sup>+</sup> GFP <sup>+</sup> cell in<br>NRBF2-deficient aNSCs<br>LV-GFP ( <i>n</i> = 3)<br>LV-sh <i>Nrbf2</i> ( <i>n</i> = 3)                                                                       | Unpaired t test<br>$t = 5.064, P = 0.007$                                                                                                                                                     |                                                                                                                                                                                                                                                                | LV-GFP<br>$39.653 \pm 0.629$<br>LV-sh <i>Nrbf2</i><br>$27.338 \pm 2.349$                                                                                                                  |
| the percent of<br>GFAP <sup>+</sup> GFP <sup>+</sup> cell in<br>NRBF2-deficient aNSCs<br>LV-GFP ( <i>n</i> = 3)<br>LV-sh <i>Nrbf2</i> ( <i>n</i> = 3)                                                                            | Unpaired t test<br>$t = 0.390, P = 0.717$                                                                                                                                                     |                                                                                                                                                                                                                                                                | LV-GFP<br>$35.047 \pm 1.393$<br>LV-sh <i>Nrbf2</i><br>$35.737 \pm 1.094$                                                                                                                  |
| S7l: the percent of<br>AC3 <sup>+</sup> GFP <sup>+</sup> cell in<br>NRBF2-deficient aNSCs<br>LV-GFP ( <i>n</i> = 3)<br>LV-sh <i>Nrbf2</i> ( <i>n</i> = 3)                                                                        | Unpaired t test<br>$t = 0.108, P = 0.920$                                                                                                                                                     |                                                                                                                                                                                                                                                                | LV-GFP<br>$1.268 \pm 0.180$<br>LV-sh <i>Nrbf2</i><br>$1.299 \pm 0.223$                                                                                                                    |
| the percent of<br>Tuj1 <sup>+</sup> AC3 <sup>+</sup> GFP <sup>+</sup> cells in<br>NRBF2-deficient aNSCs<br>LV-GFP ( <i>n</i> = 3)<br>LV-sh <i>Nrbf2</i> ( <i>n</i> = 3)                                                          | Unpaired t test<br>$t = 0.765, P = 0.487$                                                                                                                                                     |                                                                                                                                                                                                                                                                | LV-GFP<br>$7.902 \pm 0.641$<br>LV-sh <i>Nrbf2</i><br>$8.468 \pm 0.368$                                                                                                                    |
| S7n: Cell viability in<br>NRBF2- deficient aNSCs<br>LV-GFP + Vehicle<br>( <i>n</i> = 6)<br>LV-GFP + BafA1<br>( <i>n</i> = 6)<br>LV-sh <i>Nrbf2</i> + Vehicle<br>( <i>n</i> = 6)<br>LV-sh <i>Nrbf2</i> + BafA1<br>( <i>n</i> = 6) | Two-way ANOVA<br>LV-sh <i>Nrbf2</i> :<br>$F(1, 20) = 1.547,$<br>$P = 0.228$<br>BafA1: $F(1, 20) =$<br>$2.855, P = 0.107$<br>LV-sh <i>Nrbf2</i> × BafA1:<br>$F(1, 20) = 2.352,$<br>$P = 0.141$ | Bonferroni's post<br>hoc test<br>LV-GFP + Vehicle<br>vs LV-sh <i>Nrbf2</i> +<br>Vehicle, $P = 0.068$ ;<br>LV-GFP + BafA1 vs<br>LV-sh <i>Nrbf2</i> +<br>BafA1, $P > 0.999$ ;<br>LV-GFP + Vehicle<br>vs LV-GFP +<br>BafA1, $P = 0.127$ ;<br>LV-sh <i>Nrbf2</i> + | LV-GFP + Vehicle<br>$100.000 \pm 0.567$<br>LV-GFP + BafA1<br>$96.953 \pm 1.336$<br>LV-sh <i>Nrbf2</i> + Vehicle<br>$96.465 \pm 1.299$<br>LV-sh <i>Nrbf2</i> + BafA1<br>$96.782 \pm 1.009$ |

|                                                                                                                                                                                  |                                                                                                                                                          |                                                                                                                                                                                                                                                    |                                                                                                                                                        |
|----------------------------------------------------------------------------------------------------------------------------------------------------------------------------------|----------------------------------------------------------------------------------------------------------------------------------------------------------|----------------------------------------------------------------------------------------------------------------------------------------------------------------------------------------------------------------------------------------------------|--------------------------------------------------------------------------------------------------------------------------------------------------------|
|                                                                                                                                                                                  |                                                                                                                                                          | Vehicle vs LV-sh <i>Nrbf2</i> + BafA1, $P > 0.999$                                                                                                                                                                                                 |                                                                                                                                                        |
| S8a: NRBF2 expression in aNSCs treated with LV-GFP or LV-NRBF2<br>LV-GFP ( $n = 6$ )<br>LV-NRBF2 ( $n = 6$ )                                                                     | Unpaired t test<br>$t = 13.360, P < 0.001$                                                                                                               |                                                                                                                                                                                                                                                    | LV-GFP $1.000 \pm 0.109$<br>LV-NRBF2 $3.600 \pm 0.161$                                                                                                 |
| S8c: LC3-II expression in SAR405-treated aNSCs<br>Vehicle + LV-GFP ( $n = 6$ )<br>Vehicle + LV-NRBF2 ( $n = 6$ )<br>SAR405 + LV-GFP ( $n = 6$ )<br>SAR405 + LV-NRBF2 ( $n = 6$ ) | Two-way ANOVA<br>SAR405: $F(1, 20) = 19.740, P < 0.001$<br>Virus: $F(1, 20) = 11.080, P = 0.003$<br>SAR405 $\times$ Virus: $F(1, 20) = 3.428, P = 0.079$ | Bonferroni's post hoc test<br>Vehicle + LV-GFP vs SAR405 + LV-GFP, $P = 0.003$<br>Vehicle + LV-NRBF2 vs SAR405 + LV-NRBF2, $P = 0.617$<br>Vehicle + LV-GFP vs Vehicle + LV-NRBF2, $P = 0.164$<br>SAR405 + LV-GFP vs SAR405 + LV-NRBF2, $P = 0.001$ | Vehicle + LV-GFP $1.000 \pm 0.067$<br>Vehicle + LV-NRBF2 $1.395 \pm 0.128$<br>SAR405 + LV-GFP $0.630 \pm 0.044$<br>SAR405 + LV-NRBF2 $1.080 \pm 0.113$ |
| S8d: p62 expression in SAR405-treated aNSCs<br>Vehicle + LV-GFP ( $n = 6$ )<br>Vehicle + LV-NRBF2 ( $n = 6$ )<br>SAR405 + LV-GFP ( $n = 6$ )<br>SAR405 + LV-NRBF2 ( $n = 6$ )    | Two-way ANOVA<br>SAR405: $F(1, 20) = 22.060, P < 0.001$<br>Virus: $F(1, 20) = 41.430, P < 0.001$<br>SAR405 $\times$ Virus: $F(1, 20) = 4.173, P = 0.055$ | Bonferroni's post hoc test<br>Vehicle + LV-GFP vs SAR405 + LV-GFP, $P < 0.001$<br>Vehicle + LV-NRBF2 vs SAR405 + LV-NRBF2, $P = 0.011$<br>Vehicle + LV-GFP vs Vehicle + LV-NRBF2, $P = 0.151$<br>SAR405 + LV-GFP vs SAR405 + LV-NRBF2, $P < 0.001$ | Vehicle + LV-GFP $1.000 \pm 0.050$<br>Vehicle + LV-NRBF2 $0.834 \pm 0.052$<br>SAR405 + LV-GFP $1.531 \pm 0.079$<br>SAR405 + LV-NRBF2 $1.109 \pm 0.065$ |
| S8f: the percent of BrdU <sup>+</sup> GFP <sup>+</sup> cells in SAR405-treated aNSCs<br>Vehicle + LV-GFP ( $n = 4$ )                                                             | Two-way ANOVA<br>SAR405: $F(1, 12) = 5.473, P = 0.037$<br>Virus: $F(1, 12) = 12.100, P = 0.005$                                                          | Bonferroni's post hoc test<br>Vehicle + LV-GFP vs SAR405 + LV-GFP, $P = 0.003$                                                                                                                                                                     | Vehicle + LV-GFP $51.231 \pm 2.290$<br>Vehicle + LV-NRBF2 $51.181 \pm 3.728$<br>SAR405 + LV-GFP                                                        |

|                                                                                                                               |                                                       |                                                                                                                                                                                 |                                                                      |
|-------------------------------------------------------------------------------------------------------------------------------|-------------------------------------------------------|---------------------------------------------------------------------------------------------------------------------------------------------------------------------------------|----------------------------------------------------------------------|
| Vehicle + LV-NRBF2<br>( <i>n</i> = 4)<br>SAR405 + LV-GFP<br>( <i>n</i> = 4)<br>SAR405 + LV-NRBF2<br>( <i>n</i> = 4)           | SAR405 × Virus: F (1, 12) = 5.553, <i>P</i> = 0.036   | Vehicle + LV-NRBF2 vs SAR405 + LV-NRBF2, <i>P</i> = 0.886<br>Vehicle + LV-GFP vs Vehicle + LV-NRBF2, <i>P</i> > 0.999<br>SAR405 + LV-GFP vs SAR405 + LV-NRBF2, <i>P</i> = 0.012 | 34.166 ± 2.059<br>SAR405 + LV-NRBF2<br>47.899 ± 3.290                |
| S9b: NRBF2 expression in SSDS-treated mice<br>CON ( <i>n</i> = 7)<br>SSDS ( <i>n</i> = 7)                                     | Unpaired t test<br><i>t</i> = 0.020, <i>P</i> = 0.985 |                                                                                                                                                                                 | CON 1.000 ± 0.093<br>SSDS 1.003 ± 0.094                              |
| S9c: LC3-II expression in SSDS-treated mice<br>CON ( <i>n</i> = 7)<br>SSDS ( <i>n</i> = 7)                                    | Unpaired t test<br><i>t</i> = 0.572, <i>P</i> = 0.578 |                                                                                                                                                                                 | CON 1.000 ± 0.082<br>SSDS 0.935 ± 0.079                              |
| S9d: p62 expression in SSDS-treated mice<br>CON ( <i>n</i> = 7)<br>SSDS ( <i>n</i> = 7)                                       | Unpaired t test<br><i>t</i> = 0.291, <i>P</i> = 0.776 |                                                                                                                                                                                 | CON 1.000 ± 0.077<br>SSDS 1.030 ± 0.068                              |
| S10c: NRBF2 expression in NRBF2 cKD mice<br>AAV-mCherry ( <i>n</i> = 5)<br>AAV-sh <i>Nrbf2</i> ( <i>n</i> = 5)                | Unpaired t test<br><i>t</i> = 3.521, <i>P</i> = 0.008 |                                                                                                                                                                                 | AAV-mCherry<br>1.000 ± 0.075<br>AAV-sh <i>Nrbf2</i><br>0.541 ± 0.107 |
| S10d: LC3-II expression in NRBF2 cKD mice<br>AAV-mCherry ( <i>n</i> = 5)<br>AAV-sh <i>Nrbf2</i> ( <i>n</i> = 5)               | Unpaired t test<br><i>t</i> = 4.197, <i>P</i> = 0.003 |                                                                                                                                                                                 | AAV-mCherry<br>1.000 ± 0.059<br>AAV-sh <i>Nrbf2</i><br>0.665 ± 0.053 |
| S11b: LC3 puncta within Nestin <sup>+</sup> cells in DG of CSDS-exposed mice<br>CON ( <i>n</i> = 33)<br>CSDS ( <i>n</i> = 33) | Unpaired t test<br><i>t</i> = 5.530, <i>P</i> < 0.001 |                                                                                                                                                                                 | CON 14.970 ± 1.079<br>CSDS 7.970 ± 0.662                             |
| S12c: NRBF2 expression<br>AAV-mCherry ( <i>n</i> = 4)<br>AAV-NRBF2 ( <i>n</i> = 4)                                            | Unpaired t test<br><i>t</i> = 2.593, <i>P</i> = 0.041 |                                                                                                                                                                                 | AAV-mCherry<br>1.000 ± 0.099<br>AAV-sh <i>Nrbf2</i><br>1.409 ± 0.123 |
| S12d: LC3-II expression<br>AAV-mCherry ( <i>n</i> = 4)<br>AAV-NRBF2 ( <i>n</i> = 4)                                           | Unpaired t test<br><i>t</i> = 3.449, <i>P</i> = 0.014 |                                                                                                                                                                                 | AAV-mCherry<br>1.000 ± 0.091<br>AAV-NRBF2<br>1.665 ± 0.170           |

|                                                                                                                         |                                                                                                                                        |  |                                                                                                                                                |
|-------------------------------------------------------------------------------------------------------------------------|----------------------------------------------------------------------------------------------------------------------------------------|--|------------------------------------------------------------------------------------------------------------------------------------------------|
| S13h: MFGE8 peptides in NRBF2 <sup>-/-</sup> mice<br>WT ( <i>n</i> = 3)<br>NRBF2 <sup>-/-</sup> ( <i>n</i> = 3)         | Peptide 1: Unpaired t test,<br><i>t</i> = 4.257, <i>P</i> = 0.013<br>Peptide 2: Unpaired t test,<br><i>t</i> = 8.362, <i>P</i> = 0.001 |  | Peptides 1:<br>WT 1.177 ± 0.058<br>NRBF2 <sup>-/-</sup> 0.825 ± 0.060<br>Peptides 2:<br>WT 1.130 ± 0.007<br>NRBF2 <sup>-/-</sup> 0.870 ± 0.028 |
| S13i: MFGE8 expression in DG of NRBF2 <sup>-/-</sup> mice<br>WT ( <i>n</i> = 4)<br>NRBF2 <sup>-/-</sup> ( <i>n</i> = 4) | Unpaired t test<br><i>t</i> = 4.134, <i>P</i> = 0.006                                                                                  |  | WT 1.000 ± 0.087<br>NRBF2 <sup>-/-</sup> 0.587 ± 0.048                                                                                         |
| S13j: MFGE8 expression in NRBF2-deficient aNSCs<br>LV-GFP ( <i>n</i> = 6)<br>LV-sh <i>Nrbf2</i> ( <i>n</i> = 6)         | Unpaired t test<br><i>t</i> = 4.552, <i>P</i> = 0.001                                                                                  |  | LV-GFP 1.000 ± 0.068<br>LV-sh <i>Nrbf2</i> 0.593 ± 0.058                                                                                       |
| S13k: MFGE8 expression in DG after CSDS<br>CON ( <i>n</i> = 8)<br>CSDS ( <i>n</i> = 8)                                  | Unpaired t test<br><i>t</i> = 3.468, <i>P</i> = 0.004                                                                                  |  | CON 1.000 ± 0.126<br>CSDS 0.465 ± 0.089                                                                                                        |

226
